# Supplementary material for: Twelve years of chiari-like malformation and syringomyelia scanning in Cavalier King Charles Spaniels in the Netherlands: Towards a more precise phenotype
Source: PLoS One. 2017 Sep 21;12(9):e0184893. doi: 10.1371/journal.pone.0184893 (PMC5608246; doi:10.1371/journal.pone.0184893)
Supplement: S1 Table — Excel file with all, anonymized, analyzed MRI scan. (XLSX) [file pone.0184893.s002.xlsx]

## Sheet: Origineel
Breed	Gender	Fur colour	Date of the Scan	Birthday	Age when the scan was made	UK age grouping	Microchip checked?	Good quality images?	Neurological signs?	MMVD	UK CM grading BVA/KC	CM grading dutch system	Shape cerebellum (not used).	UK SM grading according to BVA/KC	CK1 Classification of the syrinx/dilation (not used).	CK2 Is the syrinx or dilation visible on the T1?	CK3 Shape of the syrinx or dilation	CK4 From where to where visible?	CK5 mm: width of the syrinx/dilation in mm	Ventricular system	Middle ear lef side	Middle ear Right side	Artefact	Previous old classification	Veterinarian	Radiologist	Were several scans made of this dog?	How often were they made?
Cavalier King Charles Spaniel	Female	Blenheim	2012-07-04	2009-04-29	3.18	b	yes	Good	No	No info provided	Grade 2	3	0	Grade 0	2	0	0	2:C2-C4	0	0	0	0	0	A	Best	L	No
Cavalier King Charles Spaniel	Male	Blenheim	2013-11-14	2006-02-13	7.75	a	Yes	Good	No	No	Grade 2	2	0	Grade 2	6	1	0	1:C2-C3	4	0	0	0	0	D	Dordrecht	L	No
Cavalier King Charles Spaniel	Female	Blenheim	2012-04-17	2005-07-13	6.76	a	yes	Good	No	No info provided	Grade 2	3	0	Grade 0	2	0	0	2:C3	0	0	3	3	0	A	Best	P	No
Cavalier King Charles Spaniel	male (*)	Blenheim (*)	2010-11-30	2010-02-23	0.77	c	Unknown		Unknown	Unknown	Grade 2	3	0	Grade 0	2	0	0	2: C2-C6	0	0	0	0	0	C	Best		Yes	3
Cavalier King Charles Spaniel	male (*)	Blenheim (*)	2011-02-24	2010-02-23	1	c	Unknown		Unknown	Unknown	Grade 2	3	0	Grade 1	3	0	0	2: C2-C6	1	0	0	0	0	C	Best		Yes	3
Cavalier King Charles Spaniel	male (*)	Blenheim (*)	2012-08-24	2010-02-23	2.5	c	Unknown		Unknown	Unknown	Grade 2	3	0	Grade 1	2	0	0	2: C2-C6	0	0	1	0	0	A	Best		Yes	3
Cavalier King Charles Spaniel			2008-03-27	2005-05-15	2.87	c	Unknown		Unknown	Unknown	Grade 2	3	0	Grade 0	2	0	0	2: C1-C5	0	0	0	0	1	A	Best		No
Cavalier King Charles Spaniel	Female	Tricolour	2013-09-27	2012-08-28	1.08	c	Yes	Good	no	No	Grade 2	2	0	Grade 1	3	1	0	2:C2-C3	0.9	0	0	0	0	C	Best	M	Yes	2
Cavalier King Charles Spaniel	Female	Tricolour	2015-03-26	2012-08-28	2.58	c	Yes	Yes	No	No	Grade 2	3	0	Grade 1	3	1	0	1:C2-C3	1	0	0	0	0	A	Best	M	Yes	2
Cavalier King Charles Spaniel	female (*)	Blenheim (*)	2007-08-29	2004-03-21	3.44	b	Unknown		Unknown	Unknown	Grade 2	3	0	Grade 2	6	1	4	1: C2-C5	4.4	0	0	1	1	D	Best		No
Cavalier King Charles Spaniel			2009-01-26	2003-01-18	6.02	a	yes		Unknown		Grade 2	2	0	Grade 0	0	0	0	0	0	0	0	0	1	A	Best		No
Cavalier King Charles Spaniel	Female	Blenheim	2013-04-12	2012-04-07	1.01	c	Yes	Goed	no	Geen	Grade 2	3	0	Grade 0	1	0	0	0	0	0	0	0	1	C	Best	P	Yes	2
Cavalier King Charles Spaniel	Female	Blenheim	2014-10-07	2012-04-07	2.5	c	Yes	Good	No	No	Grade 2	3	0	Grade 0	2	0	0	2:C1-C4	0	0	0	0	0	A	Best	M	Yes	2
Cavalier King Charles Spaniel	male (*)		2009-01-26	2007-09-15	1.36	c	Unknown		Unknown	Unknown	Grade 2	3	1	Grade 2	6	1	3	1: C2-C6	4.8	1	0	0	0	E	Best		No
Cavalier King Charles Spaniel	Female	Blenheim	2013-08-12	2008-01-01	5.61	a	Yes	Good	No	No	Grade 2	3	1	Grade 2	6	1	0	1:C2-C5	9	0	2	3	0	D	Best	M	No
Cavalier King Charles Spaniel	Male	Black and Tan	2011-12-28	2004-06-15	7.54	a	Yes	Could be better	No	No info provided	Grade 2	2	0	Grade 0	2	0	0	0	0	0	2	2	1	A	Best	Paul	No
Cavalier King Charles Spaniel			2010-06-04	2006-12-31	3.43	b	Unknown		Unknown	Unknown	Grade 2	4	0	Grade 2	6	1	3	1: C2-C6	7.4	1	0	0	0	D	Best		No
Cavalier King Charles Spaniel	male (*)		2008-01-26	2001-08-22	6.43	a	Unknown		Unknown	Unknown	Grade 2	4	0	Grade 2	5	0	0	1:C2-C5	4.3	0	3	3	1	D	Meppel		No
Cavalier King Charles Spaniel			2010-12-08	2007-06-05	3.51	b			Unknown		Grade 1	1	0	Grade 0	0	0	0	0	0	0	1	1	1	A	Best		No
Cavalier King Charles Spaniel	Female	Blenheim	2013-06-06	2011-10-09	1.66	c	Yes	Goed	No	Geen	Grade 2	3	0	Grade 1	3	1	0	1:C1-C3	0.5	0	0	0	0	C	MCD	M	Yes	2
Cavalier King Charles Spaniel	Female	Blenheim	2014-09-17	2011-10-09	2.94	c	Yes	Good	No	No	Grade 2	2	0	Grade 0	1	0	0	2:C4-C5	0	0	0	0	0	A	Dordrecht	P	Yes	2
Cavalier King Charles Spaniel	Female	Blenheim	2012-06-04	2009-11-20	2.54	c	yes	Good	No	No info provided	Grade 2	3	0	Grade 1	3	1	0	1:C2-C5	1.4	0	0	0	0	A	Best	L	No
Cavalier King Charles Spaniel	Female	Blenheim	2015-05-07	2013-04-12	2.07	c	Yes	Yes	No	No	Grade 2	3	0	Grade 1	2	0	0	2:C2-C3	0.7	0	0	0	0	C	Orion	M	No
Cavalier King Charles Spaniel	Female	Blenheim	2015-07-16	2010-05-25	5.14	a	Yes	Yes	Present	No	Grade 2	3	0	Grade 2	5	1	0	1:C2-C4	3.4	0	0	0	0	F	Dordrecht	M	No
Cavalier King Charles Spaniel	male (*)	Blenheim (*)	2010-04-27	2007-07-18	2.78	c	Unknown		Unknown	Unknown	Grade 2	3	0	Grade 2	6	1	0	1:C2-C5	4.5	0	0	1	1	D	Drachten		No
Cavalier King Charles Spaniel	Female		2011-12-22	2009-05-24	2.58	c	Not verified - not displayed on the scan	Yes	Unknown	-	Grade 2	2	0	Grade 1	3	0	0	2:C2-C3	1	0	0	0	0	A	Utrecht	Paul	No
Cavalier King Charles Spaniel	Male	Tricolor	2011-11-04	2009-04-27	2.52	c	Yes	Good	no	No info provided	Grade 2	3	0	Grade 1	3	0	0	2:C1-C5	1	0	0	0	0	A	Best		No
Cavalier King Charles Spaniel	Male	Blenheim	2013-07-03	2010-12-05	2.58	c	Yes	T2 is of moderate quality	No	Geen	Grade 2	3	0	Grade 1	3	1	0	1:C2-C4	1	0	1	1	0	A	Best	M	No
Cavalier King Charles Spaniel	male (*)		2011-02-15	2009-04-17	1.83	c	Unknown		Unknown	Unknown	Grade 2	3	0	Grade 0	2	0	0	2: C1-C6	0	0	0	1	0	C	Best		Yes	2
Cavalier King Charles Spaniel	male (*)		2011-12-12	2009-04-17	2.65	c	Unknown		Unknown		Grade 2	3	0	Grade 0	2	0	0	2: C1-C6	0	0	0	2	0	A	Best		Yes	2
Cavalier King Charles Spaniel	Female	Tricolor	2012-10-03	2009-06-14	3.3	c	yes	Good	No	No info provided	Grade 2	3	0	Grade 2	5	1	0	1:C2-C4	3.2	0	3	3	0	D	Best	D	No
Cavalier King Charles Spaniel			2012-04-13	2009-09-09	2.59	c	yes		Unknown		Grade 2	3	0	Grade 2	3	1	0	1:C2-C4	2	0	3	3	0	D	Best		No
Cavalier King Charles Spaniel	Male	Blenheim	2011-02-15	2009-09-09	1.43	c	Unknown		No	Unknown	Grade 2	3	0	Grade 0	1	0	0	2: C2-C3	0	0	0	0	0	C	Best		Yes	2
Cavalier King Charles Spaniel	Male	Blenheim	2012-04-16	2009-09-09	2.6	c	yes	Good	No	No info provided	Grade 2	3	0	Grade 0	1	0	0	2: C2-C3	0	0	0	0	0	A	Best	P	Yes	2
Cavalier King Charles Spaniel	Female	Blenheim	2012-04-16	2009-10-16	2.5	c	yes	Good	No	No info provided	Grade 2	3	0	Grade 0	2	0	0	2: C2-C3	0	0	3	3	0	A	Best	P	No
Cavalier King Charles Spaniel	Male	Blenheim	2012-04-16	2009-10-16	2.5	c	yes	Good	No	No info provided	Grade 2	2	0	Grade 0	2	0	0	2: C1-C5	0	0	0	0	0	A	Best	P	Yes	2
Cavalier King Charles Spaniel	Male	Blenheim	2011-02-15	2009-10-16	1.33	c	Unknown		No	Unknown	Grade 2	2	0	Grade 0	2	0	0	2: C1-C5	0	0	0	0	0	C	Best		Yes	2
Cavalier King Charles Spaniel	male (*)		2011-10-18	2006-06-11	5.35	a			Unknown		Grade 2	2	0	Grade 0	2	0	0	2: C1-C5	0	0	3	0	1	A	Best		No
Cavalier King Charles Spaniel	male (*)		2009-03-04	2006-06-11	2.73	c	Unknown		Unknown	Unknown	Grade 2	3	0	Grade 0	1	1	0	2:C1-C5	0	0	0	0	0	A	Best		No
Cavalier King Charles Spaniel	Female	Blenheim	2014-11-25	2013-10-15	1.11	c	Yes	Yes	No	No	Grade 2	2	0	Grade 0	1	0	0	2:C3-C4	0	0	0	0	0	C	Best	M	No
Cavalier King Charles Spaniel	female (*)	Blenheim (*)	2007-07-19	2006-06-11	1.11	c	Unknown		Unknown	Unknown	Grade 2	2	0	Grade 0	1	1	0	2:C1-C4	0	0	0	0	0	C	Best		Yes	2
Cavalier King Charles Spaniel	female (*)	Blenheim (*)	2010-12-01	2006-06-11	4.47	b	Unknown		Unknown	Unknown	Grade 2	2	0	Grade 0	1	0	0	2:C1-C5	0	0	2	0	0	A	Best		Yes	2
Cavalier King Charles Spaniel	Female	Tricolour	2014-11-19	2010-06-29	4.39	b	Yes	Yes	No	No	Grade 2	3	0	Grade 2	5	1	0	1:C2-C4	3	0	1	0	0	D	Best	M	No
Cavalier King Charles Spaniel	Male	Blenheim	2014-11-10	2013-11-10	1	c	Yes	Good	No	No	Grade 2	3	1	Grade 0	1	0	0	0	0	0	0	0	0	C	Best	M	No
Cavalier King Charles Spaniel	Female	Blenheim	2015-03-18	2013-12-16	1.26	c	Yes	Yes	No	No	Grade 2	3	0	Grade 0	0	0	0	0	0	0	0	2	1	C	Best	M	No
Cavalier King Charles Spaniel	male (*)		2011-12-12	2010-08-09	1.34	c			Unknown		Grade 2	2	0	Grade 0	1	0	0	0	0	0	1	1	0	C	Best		No
Cavalier King Charles Spaniel	Male	Blenheim	2011-12-12	2010-10-07	1.18	c	Yes	Good	No	No info provided	Grade 2	2	0	Grade 0	1	0	0	0	0	0	0	0	0	C	Best		No
Cavalier King Charles Spaniel	female (*)	Blenheim (*)	2011-02-15	2007-03-07	3.94	b			Unknown		Grade 2	2	0	Grade 1	3	0	0	2:C2-C4	1.6	0	1	0	1	A	Best		No
Cavalier King Charles Spaniel			2009-07-02	2007-03-07	2.32	c	Unknown		Unknown	Unknown	Grade 2	3	0	Grade 0	1	0	2	2:C2-C4	0	0	0	3	0	E	Best		Yes	2
Cavalier King Charles Spaniel			2011-03-23	2007-03-07	4.04	b	Unknown		Unknown	Unknown	Grade 2	3	0	Grade 0	2	0	0	2:C2-C6	0	0	0	3	0	A	Best		Yes	2
Cavalier King Charles Spaniel	male (*)		2009-07-02	2007-04-15	2.21	c	Unknown		Unknown	Unknown	Grade 2	3	1	Grade 2	4	1	2	1:C3	2.8	0	3	3	1	E	Best		No
Cavalier King Charles Spaniel	male (*)		2011-12-12	2010-12-05	1.02	c			Unknown		Grade 2	2	0	Grade 0	2	0	0	2: C2-C6	0	0	0	0	0	C	Best		No
Cavalier King Charles Spaniel	female (*)		2008-06-02	2007-06-01	1	c	Unknown		Unknown	Unknown	Grade 2	3	2	Grade 2	4	0	1	2:C2-C3	2.8	0	0	0	1	E	Best		No
Cavalier King Charles Spaniel			2012-07-03	2011-05-01	1.17	c			Unknown		Grade 2	3	0	Grade 2	6	1	0	1:C2-C4	4	0	0	0	0	E	Best		No
Cavalier King Charles Spaniel	Male	Blenheim	2008-04-11	2007-09-24	0.55	c	Unknown		Unknown	Unknown	Grade 2	3	0	Grade 0	1	0	0	2:C1-C5	0	0	0	0	0	C	Best		Yes	2
Cavalier King Charles Spaniel	Male	Blenheim	2010-04-13	2007-09-24	2.55	c	Unknown		Unknown	Unknown	Grade 2	3	0	Grade 1	3	0	0	2:C2-C4	0.9	0	0	0	1	A	Best		Yes	2
Cavalier King Charles Spaniel	Male	Blenheim	2012-09-24	2007-09-24	5	a	yes	Good	No	No info provided	Grade 2	2	0	Grade 1	3	1	0	1:C2-C3	1	0	0	0	1	A	Best	M	No
Cavalier King Charles Spaniel	Female	Blenheim	2013-11-27	2011-10-14	2.12	c	Yes	Good	No	No	Grade 2	2	0	Grade 1	3	1	2	1:C3-C4	1.5	0	3	3	1	C	Orion	L	No
Cavalier King Charles Spaniel	Female	Blenheim	2014-09-24	2011-10-24	2.92	c	Yes	Good	No	No	Grade 2	3	0	Grade 0	1	0	0	2:C3-C4	0	0	0	0	1	A	Best	P	No
Cavalier King Charles Spaniel			2011-03-23	2008-07-05	2.72	c	Unknown		Unknown	Unknown	Grade 2	3	1	Grade 2	4	1	3	1:C2-C3	2	0	0	0	1	D	Best		No
Cavalier King Charles Spaniel	Male	Blenheim	2012-12-27	2011-12-26	1	c	Yes	Yes	No	Onbekend	Grade 2	2	0	Grade 0	0	0	0	0	0	0	0	0	1	C	Best	M	Yes	2
Cavalier King Charles Spaniel	Male	Blenheim	2014-06-27	2011-12-26	2.5	c	Yes	Good	No	No	Grade 2	2	0	Grade 1	3	0	0	2:C3	0.9	0	0	0	1	A	Best	M	Yes	2
Cavalier King Charles Spaniel	Female	Blenheim	2013-07-03	2012-02-07	1.41	c	Yes		No	Geen	Grade 2	2	0	Grade 0	1	0	0	0	0	0	0	1	1	C	Best	M	No
Cavalier King Charles Spaniel	Male	Blenheim	2013-09-12	2012-02-07	1.6	c	Yes	Good	No	No	Grade 2	2	0	Grade 0	1	0	0	2:C2-C5	0	0	0	0	0	C	Best	M	Yes	2
Cavalier King Charles Spaniel	Male	Blenheim	2015-03-18	2012-02-07	3.11	b	Yes	Yes	No	No	Grade 2	2	0	Grade 0	1	0	0	2:C2-C5	0	0	0	0	0	A	Best	M	Yes	2
Cavalier King Charles Spaniel	Female	Blenheim	2012-04-16	2008-11-11	3.43	b	yes	Good	No	No info provided	Grade 2	2	0	Grade 0	1	0	0	2: C2-C6	0	0	0	0	0	A	Best	P	No
Cavalier King Charles Spaniel	female (*)	Blenheim (*)	2011-08-18	2008-12-29	2.64	c	Unknown		Unknown	Unknown	Grade 2	3	0	Grade 1	3	0	0	2:C2-C3	0.9	0	0	0	0	A	Best		No
Cavalier King Charles Spaniel	female (*)		2007-08-29	2004-01-24	3.6	b	Unknown		Unknown	Unknown	Grade 2	3	0	Grade 0	1	0	0	2:C1-C5	0	0	0	0	1	A	Best		No
Cavalier King Charles Spaniel	Male	Tricolor	2012-11-19	2011-09-23	1.16	c	yes	Good	No	No info provided	Grade 2	2	0	Grade 1	2	0	1	1:C2-C3	1	0	3	3	1	C	Dordrecht	L	No
Cavalier King Charles Spaniel	Female	Blenheim	2013-04-09	2011-09-04	1.6	c	Yes	Redelijk	no	Geen	Grade 2	2	0	Grade 2	4	1	1	1:C2-C3	2	0	0	0	0	E	Dordrecht	P	No
Cavalier King Charles Spaniel	female (*)	Blenheim (*)	2010-01-05	2008-10-12	1.23	c	Unknown		Unknown	Unknown	Grade 2	3	2	Grade 0	2	0	0	2:C2-C5	0	0	0	0	1	C	Best		Yes	2
Cavalier King Charles Spaniel	female (*)	Blenheim (*)	2011-04-18	2008-10-12	2.52	c	Unknown		Unknown	Unknown	Grade 2	3	0	Grade 0	2	0	0	2:C2-C5	0	0	0	1	1	A	Best		Yes	2
Cavalier King Charles Spaniel	Female	Blenheim	2011-11-01	2010-10-21	1.03	c	Yes	Good	no	No info provided	Grade 2	2	0	Grade 0	1	0	0	0	0	0	0	1	0	C	Best		Yes	2
Cavalier King Charles Spaniel	Female	Blenheim	2013-08-01	2010-10-21	2.78	c	Yes	Good	No	No	Grade 2	3	0	Grade 0	1	0	0	0	0	0	3	3	1	A	Best	M	Yes	2
Cavalier King Charles Spaniel	Female	Blenheim	2012-10-31	2010-12-14	1.88	c	yes	Good	No	No info provided	Grade 2	3	0	Grade 2	3	1	0	1:C3-C4	2	0	0	0	0	E	Best	M	No
Cavalier King Charles Spaniel	Female	Tricolour	2013-03-18	2011-06-20	1.74	c	Yes	Redelijk	no	Geen	Grade 2	3	0	Grade 0	2	0	0	2:C2-C4	0	0	0	0	1	C	MCD	L	No
Cavalier King Charles Spaniel	Female	Tricolour	2013-03-18	2011-07-20	1.66	c	Yes	Redelijk	no	Geen	Grade 2	2	0	Grade 0	2	0	0	2:C2-C4	0	0	0	0	0	C	MCD	L	No
Cavalier King Charles Spaniel	male (*)	Blenheim (*)	2008-01-26	2002-08-25	5.42	a	Unknown		Unknown	Unknown	Grade 2	3	1	Grade 2	6	1	0	1:C2-T3	6	0	0	0	1	D	Meppel		No
Cavalier King Charles Spaniel	female (*)	Black and tan (*)	2008-06-25	2002-08-25	5.83	a	Unknown		Unknown	Unknown	Grade 2	3	0	Grade 2	4	1	2	1:C3	2.6	0	0	0	1	D	Best		No
Cavalier King Charles Spaniel	female (*)	Tricolor (*)	2008-03-25	2002-11-01	5.4	a	Unknown		Unknown	Unknown	Grade 2	3	0	Niet beoordeelbaar						0	1	0	2		Best		No
Cavalier King Charles Spaniel	female (*)	Blenheim (*)	2007-10-16	2003-10-21	3.99	b	Unknown		Unknown	Unknown	Grade 2	3	0	Grade 0	1	0	0	2:C1	0	0	0	1	1	A	Best		No
Cavalier King Charles Spaniel	female (*)	Blenheim (*)	2008-03-12	2004-11-17	3.32	b	Unknown		Unknown	Unknown	Grade 2	3	0	Grade 2	4	1	2	1:C3	2.8	0	0	0	1	D	Best		No
Cavalier King Charles Spaniel	male (*)	Tricolor (*)	2008-10-22	2004-11-17	3.93	b	Unknown		Unknown	Unknown	Grade 2	3	0	Grade 0	1	0	0	2:C2-C5	0	0	0	0	1	A	Best		No
Cavalier King Charles Spaniel	female (*)	Tricolor (*)	2008-06-25	2005-06-09	3.04	b	Unknown		Unknown	Unknown	Grade 2	3	0	Grade 0	1	0	0	2:C2-C5	0	0	1	0	1	A	Best		No
Cavalier King Charles Spaniel	female (*)	Blenheim (*)	2010-12-27	2008-03-20	2.77	c	Unknown		Unknown	Unknown	Grade 2	3	0	Grade 1	3	1	0	1:C2-C4	1.9	0	0	0	1	A	Best		No
Cavalier King Charles Spaniel	Female	Blenheim	2014-12-19	2013-01-12	1.94	c	Yes	Yes	No	No	Grade 2	3	5	Grade 0	1	0	0	2:C3-C4	0	0	0	0	1.5	C	Best	M	No
Cavalier King Charles Spaniel	Female	Blenheim	2011-06-14	2009-05-31	2.04	c	Unknown		No	Unknown	Grade 2	2	1	Grade 0	1	0	0	2:C2-C5	0	0	0	0	1	C	Best		Yes	2
Cavalier King Charles Spaniel	Female	Blenheim	2012-10-31	2009-05-31	3.42	b	yes	Good	No	No info provided	Grade 2	2	1	Grade 0	1	0	0	2:C2-C5	0	0	0	0	1	A	Best	M	Yes	2
Cavalier King Charles Spaniel	Female	Blenheim	2012-01-12	2009-05-31	2.62	c	Yes	yes	No	No info provided	Grade 2	2	0	Grade 0	1	0	0	2: C1-C6	0	0	0	0	0	A	Best		No
Cavalier King Charles Spaniel	Female	Tricolour	2012-02-15	2009-12-08	2.19	c	Yes	Good	No	No info provided	Grade 2	2	0	Grade 0	2	0	0	2:C2-C5	0	0	0	0	0	C	Best	N	Yes	2
Cavalier King Charles Spaniel	Female	Tricolor	2012-09-06	2009-12-08	2.74	c	yes	Good	No	No info provided	Grade 2	2	0	Grade 0	2	0	0	2:C2-C5	0	0	0	0	0	A	Best	M	Yes	2
Cavalier King Charles Spaniel	female (*)	Blenheim (*)	2011-10-07	2010-11-14	0.9	c	Unknown		Unknown	Unknown	Grade 2	3	0	Grade 0	1	0	0	2:C1-C4	0	0	0	0	1	C	Best		No
Cavalier King Charles Spaniel	Male	Ruby	2013-04-12	2012-04-09	1.01	c	Yes	Goed	no	Geen	Grade 2	3	0	Grade 1	3	1	0	1:C2-C4	1	0	0	0	0	C	Best	P	Yes	2
Cavalier King Charles Spaniel	Male	Ruby	2014-10-23	2012-04-09	2.54	c	Yes	Good	No	No	Grade 2	3	1	Grade 0	2	1	0	1:C1-C5	0	0	0	0	1,5	A	Best	M	Yes	2
Cavalier King Charles Spaniel	Female	Tricolor	2011-11-25	2009-05-07	2.55	c	Yes	Poor quality	no	No info provided	Grade 2	3	0	Grade 0	1	0	0	2:C2-C4	0	0	0	0	0	A	Best		Yes	2
Cavalier King Charles Spaniel	Female	Tricolour	2014-06-26	2009-05-07	5.14	a	Yes	Good	No	No	Grade 2	3	1	Grade 1	3	0	0	2:C3-C4	1	0	0	0	1	A	Best	M	Yes	2
Cavalier King Charles Spaniel	Male	Black and Tan	2014-06-13	2012-05-30	2.04	c	Yes	Good	No	No	Grade 2	2	0	Grade 1	1	1	0	1:C3	1.9	0	0	0	1	C	MCD	M	No
Cavalier King Charles Spaniel	female (*)	Tricolor (*)	2007-06-30	2005-07-01	2	c	Unknown		Unknown	Unknown	Grade 2	4	0	Grade 1	3	0	0	2:C2-C3	0.5	0	0	0	1	C	Meppel		No
Cavalier King Charles Spaniel	male (*)	Black and tan (*)	2008-10-21	2005-10-19	3.01	b	Unknown		Unknown	Unknown	Grade 2	3	0	Grade 0	2	0	0	2:C1-C5	0	0	3	3	1	A	Best		No
Cavalier King Charles Spaniel	Female	Black and Tan	2012-02-16	2009-04-15	2.84	c	Yes	Good	No	No info provided	Grade 2	3	0	Grade 2	3	1	0	1:C2-C3	2.1	0	0	0	0	A	Dordrecht	N	No
Cavalier King Charles Spaniel	female (*)	Ruby (*)	2008-06-13	2005-10-19	2.65	c	Unknown		Unknown	Unknown	Grade 2	3	0	Grade 0	2	0	0	2:C1-C6	0	0	3	2	1	A	Best		No
Cavalier King Charles Spaniel	Female	Blenheim	2013-08-12	2011-01-11	2.59	c	Yes	Good	No	No	Grade 2	3	1	Grade 2	4	1	0	1:C2-C4	2.6	0	0	3	0	D	Best	M	No
Cavalier King Charles Spaniel	male (*)	Tricolor (*)	2011-06-28	2010-06-05	1.06	c	Unknown		Unknown	Unknown	Grade 2	3	0	Grade 0	2	0	0	2:C2-C5	0	0	0	0	1	C	Best		No
Cavalier King Charles Spaniel	Female	Blenheim	2014-04-15	2013-04-12	1.01	c	Yes	Good	No	No	Grade 2	2	0	Grade 0	1	0	0	2:C3-C4	0	0	0	0	0	C	Best	M	No
Cavalier King Charles Spaniel	Female	Blenheim	2012-03-22	2011-03-22	1	c	Yes	Good	No	No info provided	Grade 2	2	0	Grade 0	1	0	0	2:C2-C4	0	0	0	0	0	C	Best	L	No
Cavalier King Charles Spaniel	Female	Blenheim	2012-07-10	2011-03-22	1.3	c	yes	Good	No	No info provided	Grade 2	2	0	Grade 0	0	0	0	2:C2-C4	0	0	0	0	0	C	Best	L	Yes	2
Cavalier King Charles Spaniel	Female	Blenheim	2014-01-09	2011-03-22	2.8	c	Yes	Good	No	No	Grade 2	2	0	Grade 0	0	0	0	0	0	0	0	0	0	A	Best	P	Yes	2
Cavalier King Charles Spaniel	Male	Black and Tan	2014-01-31	2010-09-05	3.41	b	Yes	Good	No	No	Grade 2	2	0	Grade 0	2	0	0	0	0	0	0	0	0	A	Best	P	No
Cavalier King Charles Spaniel	Female	Tricolour	2014-03-24	2013-01-31	1.15	c	Yes	Good	No	No	Grade 2	3	0	Grade 0	1	0	0	2:C2-C3	0	0	0	0	0	C	Best	M	No
Cavalier King Charles Spaniel	female (*)	Tricolor (*)	2008-01-26	2003-09-11	4.38	b	Unknown		Unknown	Unknown	Grade 2	3	0	Grade 1	3	0	0	2:C2-T3	1.2	0	0	1	1	A	Meppel		No
Cavalier King Charles Spaniel	male (*)	Tricolor (*)	2010-09-09	2003-06-14	7.24	a	Unknown		Unknown	Unknown	Grade 2	3	0	Grade 1	3	1	0	1:C3-C4	0.8	0	3	3	1	A	Best		No
Cavalier King Charles Spaniel	female (*)	Black and tan (*)	2011-02-11	2007-02-04	4.02	b	Unknown		Unknown	Unknown	Grade 1	1	0	Grade 1	3	0	2	2:C3-C4	1.2	0	0	0	1	A	Best		No
Cavalier King Charles Spaniel	Female	Blenheim	2013-04-04	2009-07-26	3.69	b	Yes	Good	no	Geen	Grade 2	3	0	Grade 0	1	0	0	0	0	0	0	0	0	A	Utrecht	M	No
Cavalier King Charles Spaniel	Female	Blenheim	2013-04-03	2009-07-28	3.68	b	Yes	Good	no	Geen	Grade 2	3	0	Grade 0	1	0	0	0	0	0	0	0	0	A	Utrecht	M	No
Cavalier King Charles Spaniel	Female	Ruby	2015-04-17	2012-09-12	2.6	c	Yes	Yes	No	No	Grade 2	3	0	Grade 0	0	0	0	2:C3-C4	0	0	0	0	0	A	Best	M	No
Cavalier King Charles Spaniel	Female	Black and Tan	2015-10-05	2012-06-08	3.33	b	Yes	Yes	No	Unknown	Grade 2	3	1	Grade 0	2	0	0	2:C3-C4	0	0	0	0	1	A	Best	M	No
Cavalier King Charles Spaniel	Female	Blenheim	2012-05-10	2010-12-01	1.44	c	yes	Good	No	No info provided	Grade 2	3	0	Grade 0	0	0	0	0	0	0	0	0	0	C	Best	L	Yes	2
Cavalier King Charles Spaniel	Female	Blenheim	2013-12-02	2010-12-01	3	b	Yes	Good	No	No	Grade 2	3	0	Grade 0	1	0	0	2:C2-C3	0	0	0	0	0	A	Best	L	Yes	2
Cavalier King Charles Spaniel	Female	Blenheim	2015-01-19	2012-03-07	2.87	c	Yes	Yes	No	No	Grade 2	3	2	Grade 0	1	0	0	2:C3	0	0	0	1	0	A	Best	M	No
Cavalier King Charles Spaniel	Female	Blenheim	2013-04-10	2012-03-07	1.09	c	Yes	Goed	no	Geen	Grade 2	2	0	Grade 0	1	0	0	0	0	0	0	0	1	C	Best	P	No
Cavalier King Charles Spaniel	Female	Tricolour	2015-01-19	2013-06-13	1.6	c	Yes	Yes	No	No	Grade 2	3	2	Grade 0	1	0	0	2:C2-C5	0	0	0	0	1	C	Best	M	No
Cavalier King Charles Spaniel	Male	Blenheim	2013-12-02	2010-12-01	3	b	Yes	Good	No	No	Grade 2	2	0	Grade 0	0	0	0	0	0	0	0	0	0	A	Best	L	No
Cavalier King Charles Spaniel			2011-10-24	2006-08-24	5.17	a			Unknown		Grade 2	3	0	Grade 2	6	1	3	1:C2-C7	6.4	2	3	3	1	D	Best		No
Cavalier King Charles Spaniel	Male	Tricolour	2011-03-14	2010-09-30	0.46	c	Unknown		No	Unknown	Grade 2	2	0	Grade 0	1	0	0	0	0	0	0	0	1	C	Best		Yes	3
Cavalier King Charles Spaniel	Male	Tricolour	2011-10-18	2010-09-30	1.05	c	Yes	Good	no	No info provided	Grade 1	2	0	Grade 0	1	0	0	0	0	0	0	0	1	C	Best		Yes	3
Cavalier King Charles Spaniel	Male	Tricolour	2013-04-10	2010-09-30	2.53	c	Yes	Goed	no	Geen	Grade 2	4	0	Grade 0	1	0	0	0	0	0	0	0	0	A	Best	P	Yes	3
Cavalier King Charles Spaniel	Female	Blenheim	2012-07-19	2011-01-13	1.52	c	yes	Good	No	No info provided	Grade 2	2	0	Grade 1	2	0	0	2:C1-C6	0.8	0	0	0	1	C	Dordrecht	N	Yes	2
Cavalier King Charles Spaniel	Female	Blenheim	2013-07-15	2011-01-13	2.51	c	Yes		No	Geen	Grade 2	3	0	Grade 1	3	1	0	1:C2-C4	1.3	0	2	0	0	A	Best	HAJ	Yes	2
Cavalier King Charles Spaniel	Female	Blenheim	2011-02-03	2009-07-18	1.54	c	Unknown		No	Unknown	Grade 2	3	0	Grade 1	3	0	0	2:C2-C5	0.7	0	0	1	1	C	Best		Yes	2
Cavalier King Charles Spaniel	Female	Blenheim	2012-07-11	2009-07-18	2.98	b	yes	Good	No	No info provided	Grade 2	2	0	Grade 2	4	1	0	1:C3-C4	2.1	0	0	3	1	D	Best	L	Yes	2
Cavalier King Charles Spaniel	Female	Blenheim	2015-02-16	2012-04-08	2.86	c	Yes	Yes	No	No	Grade 2	2	0	Grade 1	3	1	0	1:C2-C4	1.5	0	0	3	0	A	Best	M	No
Cavalier King Charles Spaniel	Female	Tricolour	2014-08-05	2013-02-14	1.48	c	Yes	Good	No	No	Grade 2	2	0	Grade 0	1	0	0	2:C1-C5	0	0	0	0	1	C	Best	M	No
Cavalier King Charles Spaniel	female (*)	Black and tan (*)	2010-12-10	2006-10-14	4.16	b	Unknown		Unknown	Unknown	Grade 2	3	0	Grade 0	2	0	0	2:C1-C5	0	0	0	0	1	A	Best		No
Cavalier King Charles Spaniel	Male	Blenheim	2015-01-08	2013-12-24	1.04	c	Yes	Yes	No	No	Grade 2	3	0	Grade 0	2	0	0	0	0	0	0	0	0	C	Best	M	No
Cavalier King Charles Spaniel			2009-01-26	2007-02-18	1.94	c	Unknown		Unknown	Unknown	Grade 2	3	0	Grade 1	3	0	1	2:C2-C4	0.5	0	3	3	0	E	Best		Yes	2
Cavalier King Charles Spaniel			2009-12-23	2007-02-18	2.85	c	Unknown		Unknown	Unknown	Grade 2	3	0	Grade 1	3	1	1	1:C3	1.9	0	3	3	0	A	Best		Yes	2
Cavalier King Charles Spaniel	Male	Blenheim	2015-09-29	2008-10-29	6.92	a	Yes	Yes	Present	Unknown	Grade 2	3	0	Grade 0	2	0	0	2:C1-C6	0	0	3	3	0	A	Utrecht	M	No
Cavalier King Charles Spaniel	female (*)	Blenheim (*)	2009-12-23	2008-09-11	1.28	c	Unknown		Unknown	Unknown	Grade 2	3	0	Grade 0	2	0	0	2:C1-C5	0	0	0	0	0	C	Best		Yes	2
Cavalier King Charles Spaniel	female (*)	Blenheim (*)	2011-04-28	2008-09-11	2.63	c	Unknown		Unknown	Unknown	Grade 2	3	0	Grade 1	4	1	1	1:C3	1.4	0	0	0	0	A	Best		Yes	2
Cavalier King Charles Spaniel	Male	Black and Tan	2015-10-20	2010-12-18	4.84	b	Yes	Yes	No	Unknown	Grade 2	3	0	Grade 1	3	1	0	1:C3-C4	1.9	0	0	1	0	A	Best	M	No
Cavalier King Charles Spaniel			2007-10-10	2004-02-11	3.66	b	Unknown		Unknown	Unknown	Grade 2	3	0	Grade 0	2	0	0	2:C1-C5	0	0	0	0	0	A	Best		No
Cavalier King Charles Spaniel	Male	Black and Tan	2011-12-22	2010-12-18	1.01	c	Yes	Poor quality	No	No info provided	Grade 2	2	0	Grade 0	1	0	0	0	0	0	0	0	1	C	Dordrecht		No
Cavalier King Charles Spaniel	female (*)	Tricolor (*)	2004-12-04	2002-08-18	2.29	c	Unknown		Unknown	Unknown	Grade 2	2	0	Grade 0	2	0	0	0	0	0	2	0	1	C	Meppel		No
Cavalier King Charles Spaniel	female (*)	Ruby (*)	2010-12-29	2009-06-11	1.55	c	Unknown		Unknown	Unknown	Grade 2	3	0	Grade 2	5	1	0	1:C3	3.1	0	0	0	0	E	Best		No
Cavalier King Charles Spaniel	Female	Ruby	2015-07-06	2013-08-29	1.85	c	Yes	Yes	No	No	Grade 2	3	0	Grade 1	2	0	0	2:C2	0.7	0	1	0	1	C	Best	M	No
Cavalier King Charles Spaniel	male (*)		2011-01-07	2003-03-11	7.82	a	Unknown		Unknown	Unknown	Grade 2	3	0	Grade 0	2	0	0	2:C1-C4	0	0	3	0	1	A	Best		No
Cavalier King Charles Spaniel	Female	Tricolour	2015-09-02	2014-08-31	1.01	c	Yes	Yes	No	Unknown	Grade 2	2	0	Grade 0	2	0	0	2:C3	0	0	3	3	0	C	Best	M	No
Cavalier King Charles Spaniel	Male	Blenheim	2015-07-24	2013-04-01	2.31	c	Yes	No	Unknown	Unknown	Grade 2	3	0	Grade 1	3	1	0	1:C3	1.5	0	0	0	1	C	Utrecht	M	No
Cavalier King Charles Spaniel	female (*)		2009-08-07	2008-09-09	0.91	c	Unknown		Unknown	Unknown	Grade 2	3	0	Grade 0	1	0	0	2:C1-C5	0	0	0	0	1	C	Best		Yes	2
Cavalier King Charles Spaniel	female (*)		2011-03-30	2008-09-09	2.56	c	Unknown		Unknown	Unknown	Grade 2	3	0	Grade 0	2	0	0	2:C1-C5	0	0	0	0	1	A	Best		Yes	2
Cavalier King Charles Spaniel	Male	Blenheim	2014-06-24	2008-09-14	5.78	a	Yes: M44859	Good	No	No	Grade 2	3	0	Grade 1	2	1	0	1:C3	0.8	0	0	0	1	A	Utrecht	M	Yes	2
Cavalier King Charles Spaniel	Male	Blenheim	2009-10-28	2008-09-14	1.12	c	Unknown		No	Unknown	Grade 2	3	0	Grade 0	1	0	0	2:C1-C5	0	0	0	1	0	C	Best		Yes	2
Cavalier King Charles Spaniel	Female	Blenheim	2012-08-31	2009-02-12	3.55	b			No		Grade 2	2	0	Grade 0	1	0	0	2:C2-C5	0	1	3	3	1	A	Utrecht		Yes	2
Cavalier King Charles Spaniel	Female	Blenheim	2014-06-24	2009-02-12	5.37	a	Yes:M47027	Good	No	No	Grade 2	2	0	Grade 0	1	0	0	0	0	0	3	3	1	A	Utrecht	M	Yes	2
Cavalier King Charles Spaniel	Male	Blenheim	2015-07-24	2014-07-19	1.01	c	Yes	Yes	No	No	Grade 2	3	1	Grade 0	0	0	0	0	0	2	0	0	1	C	Best	M	No
Cavalier King Charles Spaniel	Female	Blenheim	2011-12-16	2010-09-30	1.21	c	Yes	Good	No	No info provided	Grade 2	2	1	Grade 0	2	0	0	0	0	0	0	0	0	C	Best		Yes	2
Cavalier King Charles Spaniel	Female	Blenheim	2013-04-10	2010-09-30	2.53	c	Yes	Goed	no	Geen	Grade 2	3	0	Grade 0	1	0	0	0	0	0	0	0	0	A	Best	P	Yes	2
Cavalier King Charles Spaniel	male (*)	Blenheim (*)	2010-08-09	2007-12-09	2.67	c	Unknown		Unknown	Unknown	Grade 2	3	0	Grade 0	2	0	0	2:C1-C5	0	0	0	0	1	A	Best		No
Cavalier King Charles Spaniel	Female	Ruby	2015-01-16	2013-12-25	1.06	c	Yes	Yes	No	No	Grade 2	3	0	Grade 0	1	0	0	2:C1-C6	0	0	0	0	0	C	Best	M	No
Cavalier King Charles Spaniel	Female	Tricolour	2012-05-03	2008-03-15	4.13	b			Unknown		Grade 2	3	1	Grade 1	3	0	0	2:C2-C6	1.5	0	0	0	1	A	Dordrecht		No
Cavalier King Charles Spaniel	female (*)	Blenheim (*)	2010-01-25	2006-10-05	3.31	b	Unknown		Unknown	Unknown	Grade 2	3	0	Grade 0	1	0	0	2:C1-C4	0	0	0	3	1	A	Best		No
Cavalier King Charles Spaniel	Female	Blenheim	2015-12-07	2012-05-29	3.52	b	Yes	Yes	no	Unknown	Grade 2	3	0	Grade 0	1	0	0	0	0	0	1	1	1	A	Orion	M	No
Cavalier King Charles Spaniel	female (*)	Blenheim (*)	2011-05-13	2008-11-02	2.53	c	Unknown		Unknown	Unknown	Grade 2	3	0	Grade 0	2	0	0	2:C2-C5	0	0	0	0	1	A	Best		No
Cavalier King Charles Spaniel			2010-12-08	2007-06-08	3.5	b			Unknown		Grade 2	2	0	Grade 0	2	0	0	0	0	0	0	0	1	A	Best		No
Cavalier King Charles Spaniel	Female	Blenheim	2013-08-22	2012-08-18	1.01	c	Yes	Good	No	No	Grade 2	3	0	Grade 1	3	0	0	2:C2-C4	1	0	0	2	1	C	Best	M	Yes	2
Cavalier King Charles Spaniel	Female	Blenheim	2015-02-19	2012-08-18	2.5	c	Yes	Yes	No	No	Grade 2	2	0	Grade 2	5	1	3	1:C2-C3	3.5	0	3	0	1	D	Best	M	Yes	2
Cavalier King Charles Spaniel	female (*)	Blenheim (*)	2007-07-01	2006-03-27	1.26	c	Unknown		Unknown	Unknown	Grade 2	3	0	Grade 2	4	1	3	1:C3	2	0	1	0	1	D	Doetichem		Yes	2
Cavalier King Charles Spaniel	female (*)	Blenheim (*)	2009-09-30	2006-03-27	3.51	b	Unknown		Unknown	Unknown	Grade 2	3	0	Grade 2	5	1	3	1:C3	4	0	1	0	1	D	Best		Yes	2
Cavalier King Charles Spaniel	Female	Black and Tan	2008-07-15	2005-05-15	3.17	b	Unknown		No	Unknown	Grade 2	3	5	Grade 0	2	0	0	2:C2-C4	0	0	0	0	1	A	Best		Yes	2
Cavalier King Charles Spaniel	Female	Black and Tan	2012-02-27	2005-05-15	6.78	a	Yes	Good	No	No info provided	Grade 2	2	5	Grade 1	3	1	0	1:C2-C3	1.2	0	0	0	1	A	Best	L	Yes	2
Cavalier King Charles Spaniel	Male	Blenheim	2012-11-26	2011-03-16	1.69	c	Yes	Yes	No	Onbekend	Grade 2	2	0	Grade 0	1	0	0	0	0	0	0	0	0	C	Best	P	No
Cavalier King Charles Spaniel	Female	Blenheim	2012-02-14	2009-12-07	2.19	c	Yes	Good	No	No info provided	Grade 2	2	0	Grade 0	1	0	0	0	0	0	0	0	0	C	Best	N	No
Cavalier King Charles Spaniel	Female	Ruby	2014-03-31	2011-05-29	2.84	c	Yes	Good	No	No	Grade 2	3	2	Grade 0	1	0	0	2:C2-C5	0	0	1	0	0	A	Best	M	No
Cavalier King Charles Spaniel	Female	Blenheim	2012-10-23	2011-05-03	1.47	c	yes	Good	No	No info provided	Grade 2	2	0	Grade 0	0	0	0	0	0	0	0	0	0	C	Best	M	Yes	2
Cavalier King Charles Spaniel	Female	Blenheim	2014-04-01	2011-05-03	2.91	c	Yes	Good	No	No	Grade 2	3	0	Grade 1	3	0	0	2:C2-C3	1.4	0	3	3	0	A	Best	M	Yes	2
Cavalier King Charles Spaniel	Male	Black and Tan	2014-09-24	2012-03-02	2.56	c	Yes	Good	No	No	Grade 2	3	0	Grade 0	1	0	0	2:C2-C3	0	0	0	0	1	A	Best	P	No
Cavalier King Charles Spaniel	Female	Ruby	2014-09-24	2012-09-03	2.06	c	Yes	Good	No	No	Grade 2	3	0	Grade 1	3	1	1	1:C3	1	0	0	0	1	C	Best	P	No
Cavalier King Charles Spaniel	Female	Blenheim	2014-09-19	2013-09-15	1.01	c	Yes	Good	No	No	Grade 2	2	0	Grade 0	1	0	0	2:C1-C3	0	0	0	0	0	C	Best	P	No
Cavalier King Charles Spaniel	Female	Blenheim	2014-03-18	2011-01-14	3.18	b	Yes	Good	No	No	Grade 2	3	0	Grade 0	1	0	0	2:C2-C3	0	0	1	2	0	A	Best	M	No
Cavalier King Charles Spaniel			2007-10-10	2004-07-08	3.26	b	Unknown		Unknown	Unknown	Grade 1	1	0	Grade 1	1	3	0	1:C3	1	0	0	0	0	A	Best		No
Cavalier King Charles Spaniel	Female	Ruby	2010-10-27	2008-11-04	1.98	c	Unknown		No	Unknown	Grade 2	3	0	Grade 1	3	1	3	1:C3	1	0	1	1	0	C	Best		Yes	2
Cavalier King Charles Spaniel	Female	Ruby	2012-06-29	2008-11-04	3.65	b	yes	Good	No	No info provided	Grade 2	3	0	Grade 1	3	1	0	1:C3	1.8	0	3	3	0	A	Best	L	Yes	2
Cavalier King Charles Spaniel	Female	Tricolour	2014-07-10	2012-01-02	2.52	c	Yes	Good	No	No	Grade 2	3	0	Grade 2	5	1	3	1	4	0	0	0	1	D	Best	M	No
Cavalier King Charles Spaniel	Female	Blenheim	2010-08-24	2009-01-08	1.63	c	Unknown		No	Unknown	Grade 2	3	0	Grade 0	2	0	0	2:C2-C4	0	0	1	1	0	C	Best		Yes	2
Cavalier King Charles Spaniel	Female	Blenheim	2011-11-09	2009-01-08	2.84	c	Yes	Good	no	No info provided	Grade 1	1	0	Grade 0	2	0	0	2:C2-C4	0	0	3	3	0	A	Best		Yes	2
Cavalier King Charles Spaniel	reu	Blenheim	2012-01-19	2008-02-11	3.94	b	ja	Matig	No	Auscultatie: geen ruis 0/6	Grade 2	3	0	Grade 2	4	1	0	1:C2-C4	2.3	0	0	0	0	D	Dordrecht		No
Cavalier King Charles Spaniel	Female	Blenheim	2012-11-20	2010-05-20	2.5	c	Yes	Yes	No	Onbekend	Grade 2	2	0	Grade 0	0	0	0	2:C2-C4	0	0	0	0	1	A	Best	P	No
Cavalier King Charles Spaniel	female (*)		2009-09-07	2006-03-11	3.49	b	Unknown		Unknown	Unknown	Grade 2	3	1	Grade 2	5	1	3	1:C2-C3	3	0	1	0	0	D	Best		No
Cavalier King Charles Spaniel	Male	Tricolour	2014-09-01	2013-07-26	1.1	c	Yes	Good	No	No	Grade 2	2	0	Grade 0	1	0	0	2:C1-C5	0	0	0	0	0	C	Best	M	No
Cavalier King Charles Spaniel	female (*)	Black and tan (*)	2009-03-04	2005-11-23	3.28	b	Unknown		Unknown	Unknown	Grade 2	3	2	Grade 0	1	0	0	2:C2-C6	0	0	0	0	0	A	Best		No
Cavalier King Charles Spaniel	female (*)	Black and tan (*)	2010-05-19	2007-11-15	2.51	c	Unknown		Unknown	Unknown	Grade 2	3	5	Grade 0	2	0	0	2:C2-C6	0	0	1	1	1.5	A	Best		No
Cavalier King Charles Spaniel	Female	Blenheim	2010-11-17	2010-06-03	0.46	c	Unknown		No	Unknown	Grade 2	2	2	Grade 0	1	0	0	2:C2-C3	0	0	1	1	1.5	C	Best		Yes	3
Cavalier King Charles Spaniel	Female	Blenheim	2011-10-18	2010-06-03	1.38	c	Yes	Good	no	No info provided	Grade 2	2	0	Grade 0	1	0	0	2:C2-C5	0	0	3	3	1	C	Best		Yes	3
Cavalier King Charles Spaniel	Female	Blenheim	2012-12-10	2010-06-03	2.52	c	Yes	Yes	No	Onbekend	Grade 2	2	0	Grade 0	1	0	0	2:C2-C5	0	0	3	3	1	A	Best	S	Yes	3
Cavalier King Charles Spaniel	Female	Tricolor	2012-09-24	2011-09-11	1.04	c	yes	Good	No	No info provided	Grade 2	3	0	Grade 0	0	0	0	2:C2-C4	0	0	0	0	1	C	Best	M	Yes	2
Cavalier King Charles Spaniel	Female	Tricolour	2014-03-27	2011-09-11	2.54	c	Yes	Good	No	No	Grade 2	3	0	Grade 1	3	0	0	1:C1-C4	0.9	0	1	0	0	A	Best	M	Yes	2
Cavalier King Charles Spaniel	Female	Tricolour	2012-05-09	2009-10-24	2.54	c	yes	Good	No	No info provided	Grade 2	2	0	Grade 1	3	1	0	1:C3-C4	1	0	3	0	0	A	Best	L	No
Cavalier King Charles Spaniel	Female	Blenheim	2011-12-22	2008-10-21	3.17	b	Yes	Good	No	No info provided	Grade 2	2	0	Grade 0	1	0	0	2:C2-C4	0	0	0	0	0	A	Best	Stefanie	Yes	2
Cavalier King Charles Spaniel	Female	Blenheim	2013-12-31	2008-10-21	5.19	a	Yes	Good	No	No	Grade 2	2	0	Grade 0	0	0	0	0	0	0	0	0	0	A	Best	P	Yes	2
Cavalier King Charles Spaniel	Female	Blenheim	2013-04-15	2011-11-24	1.39	c	Yes	Goed	no	Geen	Grade 2	3	0	Grade 0	1	0	0	0	0	0	2	0	0	C	Best	P	Yes	2
Cavalier King Charles Spaniel	Female	Blenheim	2015-01-21	2011-11-24	3.16	b	Yes	Yes	No	No	Grade 2	2	0	Grade 0	1	0	0	2:C2-C5	0	0	0	0	1	A	Best	M	Yes	2
Cavalier King Charles Spaniel	Male	Blenheim	2013-09-12	2012-02-09	1.59	c	Yes	Good	No	No	Grade 2	2	0	Grade 0	1	0	0	2:C2-C5	0	0	1	0	0	C	Best	M	Yes	2
Cavalier King Charles Spaniel	Male	Blenheim	2014-12-02	2012-02-09	2.81	c	Yes	Yes	No	No	Grade 2	2	0	Grade 0	1	0	0	2:C2-C4	0	0	0	0	0	A	Best	M	Yes	2
Cavalier King Charles Spaniel	Male	Blenheim	2013-07-03	2012-06-24	1.03	c	Yes	T2: not aligned	No	Geen	Grade 2	3	0	Grade 0	1	0	0	0	0	0	1	1	0	C	Best	M	No
Cavalier King Charles Spaniel	Male	Blenheim	2014-11-25	2012-11-25	2	c	Yes	Yes	No	No	Grade 2	3	0	Grade 1	3	0	2	2:C3	1	0	0	0	0	C	Best	M	Yes	2
Cavalier King Charles Spaniel	Male	Blenheim	2015-06-30	2012-11-25	2.6	c	Yes	Yes	No	No	Grade 2	3	0	Grade 1	2	1	0	1:C3	0.8	0	0	1	0	A	Best	M	Yes	2
Cavalier King Charles Spaniel	Female	Tricolour	2015-09-22	2014-05-23	1.33	c	Yes	Yes	No	Unknown	Grade 2	3	0	Grade 0	1	0	0	2:C1-C3	0	0	0	0	0	C	Drachten	M	No
Cavalier King Charles Spaniel	Female	Tricolour	2012-12-06	2010-03-21	2.71	c	Yes	Yes	No	Onbekend	Grade 2	3	0	Grade 0	1	0	0	2:C2-C6	0	0	3	3	0	A	Best	P	No
Cavalier King Charles Spaniel	Female	Tricolor	2012-09-18	2010-03-21	2.49	c	yes	Good	No	No murmur	Grade 2	2	0	Grade 2	4	1	0	1:C2	2	0	0	0	1	D	Dordrecht	L	No
Cavalier King Charles Spaniel	female (*)	Black and tan (*)	2011-06-15	2007-06-26	3.97	b	Unknown		Unknown	Unknown	Grade 2	3	0	Grade 2	4	1	0	1:C2-C3	2.4	0	0	0	1.5	D	Best		No
Cavalier King Charles Spaniel	Female	Blenheim	2013-06-20	2011-12-04	1.54	c	Yes	Goed	No	Geen	Grade 2	3	1	Grade 2	5	1	0	1:C2-C3	3.6	0	0	0	0	E	Best	M	No
Cavalier King Charles Spaniel	female (*)	Tricolor (*)	2011-03-29	2007-10-20	3.44	b	Unknown		Unknown	Unknown	Grade 2	3	0	Grade 2	4	0	0	2:C2-C4	2.1	0	0	0	1	D	Best		No
Cavalier King Charles Spaniel	Female	Blenheim	2010-10-05	2009-03-15	1.56	c	Unknown		No	Unknown	Grade 2	2	0	Grade 0	2	0	0	2:C2-C4	0	0	0	0	1	C	Best		Yes	2
Cavalier King Charles Spaniel	Female	Blenheim	2012-05-14	2009-03-15	3.16	b	yes	Good	No	No info provided	Grade 2	2	0	Grade 0	2	0	0	2:C2-C4	0	0	0	0	0	A	Best	M	Yes	2
Cavalier King Charles Spaniel			2010-12-08	2008-03-19	2.72	c	Unknown		Unknown	Unknown	Grade 2	2	0	Grade 0	2	0	0	2:C2-C6	0	0	0	0	0	A	Best		No
Cavalier King Charles Spaniel	Female	Blenheim	2013-12-30	2012-10-12	1.22	c	Yes	Good	No	No	Grade 2	2	0	Grade 0	1	0	0	0	0	0	0	0	0	C	Best	P	No
Cavalier King Charles Spaniel	Female	Tricolour	2015-08-25	2013-09-10	1.96	c	Yes	Yes	No	Unknown	Grade 2	3	0	Grade 0	1	0	0	0	0	0	0	1	0	C	Best	M	No
Cavalier King Charles Spaniel	male (*)		2007-06-30	2005-06-26	2.01	c	Unknown		Unknown	Unknown	Grade 2	2	0	Grade 0	2	0	0	2:C2-C3	0	0	1	3	0	C	Meppel		No
Cavalier King Charles Spaniel	Female	Blenheim	2013-05-16	2010-10-27	2.55	c	Yes	Goed	No	Geen	Grade 2	2	0	Grade 0	1	0	0	0	0	0	0	0	0	A	Best	P	No
Cavalier King Charles Spaniel	Female	Blenheim	2013-05-16	2010-10-27	2.55	c	Yes	Goed	No	Geen	Grade 2	2	0	Grade 0	1	0	0	0	0	0	0	0	1	A	Best	P	No
Cavalier King Charles Spaniel	Female	Blenheim	2015-09-22	2014-05-23	1.33	c	Yes	Yes	No	Unknown	Grade 2	2	2	Grade 0	1	0	0	2:C2-C4	0	0	0	0	0	C	Drachten	M	No
Cavalier King Charles Spaniel	Female	Black and Tan	2013-07-11	2010-09-14	2.83	c	Yes	Yes	No	Geen	Grade 2	2	0	Grade 2	3	0	1	2:C2-C5	1.2	0	2	3	0	D	MCD	L	No
Cavalier King Charles Spaniel	Female	Ruby	2013-07-26	2012-06-29	1.08	c	Yes	Moderate	No	No	Grade 2	2	0	Grade 0	1	0	0	0	0	0	0	0	0	C	Best	M	No
Cavalier King Charles Spaniel	Male	Black and Tan	2013-07-25	2012-03-20	1.35	c	Yes	Good	No	No	Grade 2	3	1	Grade 1	3	1	0	1:C3	1.3	0	0	0	1	C	Best	M	Yes	2
Cavalier King Charles Spaniel	Male	Black and Tan	2014-11-14	2012-03-20	2.65	c	Yes	Good	No	No	Grade 2	3	0	Grade 2	4	1	0	1:C3	2.6	0	0	0	0	D	Best	M	Yes	2
Cavalier King Charles Spaniel	Female	Tricolour	2013-07-24	2011-11-25	1.66	c	Yes	Good	No	No	Grade 2	2	0	Grade 1	3	1	0	1:C3	1.4	3	0	3	0	C	Best	M	Yes	2
Cavalier King Charles Spaniel	Female	Tricolour	2015-04-02	2011-11-25	3.35	b	Yes	Yes	No	No	Grade 2	2	0	Grade 1	3	1	0	1:C2-C3	1.4	2	0	1	0	A	Best	M	Yes	2
Cavalier King Charles Spaniel	Female	Blenheim	2013-07-24	2011-11-25	1.66	c	Yes	Good	No	No	Grade 2	2	0	Grade 0	1	0	0	2:C2-C5	0	3	0	0	0	C	Best	M	Yes	2
Cavalier King Charles Spaniel	Female	Blenheim	2014-12-15	2011-11-25	3.06	b	Yes	Yes	No	No	Grade 2	2	0	Grade 0	1	0	0	2:C3	0	3	0	0	0	A	Best	M	Yes	2
Cavalier King Charles Spaniel	Male	Black and Tan	2013-11-15	2012-11-07	1.02	c	Yes	Good	no	No	Grade 2	3	1	Grade 1	2	0	0	2:C1-C3	0.7	0	0	0	0	C	Best	M	No
Cavalier King Charles Spaniel	Male	Ruby	2015-02-02	2011-12-02	3.17	b	Yes	Yes	no	Unknown	Grade 2	3	0	Grade 1	2	0	0	2:C2-C5	0.8	0	0	0	0	A	Utrecht	M	No
Cavalier King Charles Spaniel	Female	Blenheim	2012-02-02	2010-08-01	1.5	c	Yes	Good	No	No info provided	Grade 2	2	0	Grade 0	2	0	0	2:C2-C4	0	0	0	0	0	C	Best	L	Yes	2
Cavalier King Charles Spaniel	Female	Blenheim	2013-08-08	2010-08-01	3.02	b	Yes	Fair	No	No	Grade 2	2	0	Grade 2	4	1	3	1:C2-C3	2.1	0	0	0	1	D	MCD	M	Yes	2
Cavalier King Charles Spaniel	Male	Blenheim	2015-01-29	2011-06-17	3.62	c	Yes	Yes	No	No	Grade 2	2	0	Grade 0	0	0	0	0	0	0	2	2	1	A	Best	M	No
Cavalier King Charles Spaniel	male (*)	Blenheim (*)	2011-07-07	2003-04-03	8.26	a	Unknown		Unknown	Unknown	Grade 2	3	0	Grade 2	4	1	0	1:C3-C4	2.8	0	0	0	0	D	Best		No
Cavalier King Charles Spaniel	Female	Tricolour	2012-11-26	2009-12-07	2.97	c	Yes	No, position is not correct	No	Onbekend	Grade 2	2	0	Grade 2	6	1	0	1:C2-C3	4.9	0	0	0	0	D	Best	P	No
Cavalier King Charles Spaniel	female (*)	Black and tan (*)	2007-10-15	2006-05-13	1.42	c	Unknown		Unknown	Unknown	Grade 2	3	0	Grade 0	2	0	0	2:C1-C6	0	0	0	0	0	C	Best		Yes	2
Cavalier King Charles Spaniel	female (*)	Black and tan (*)	2009-06-17	2006-05-13	3.09	b	Unknown		Unknown	Unknown	Grade 2	3	0	Grade 0	2	0	0	2:C2-C4	0	0	1	0	0	A	Best		Yes	2
Cavalier King Charles Spaniel	Male	Blenheim	2013-02-19	2011-09-29	1.39	c	Yes	Yes	No	Onbekend	Grade 2	4	0	Grade 0	1	0	0	2:C2-C4	0	0	0	0	1	C	Best	P	Yes	2
Cavalier King Charles Spaniel	Male	Blenheim	2014-10-27	2012-02-13	2.71	c	Yes	Good	No	No	Grade 2	2	0	Grade 1	3	1	0	1:C3	1.5	0	0	0	0	A	Best	M	Yes	2
Cavalier King Charles Spaniel	Female	Blenheim	2011-08-10	2010-02-23	1.46	c	Unknown		No	Unknown	Grade 2	3	0	Grade 0	2	0	0	0	0	0	0	0	0	C	Best		Yes	2
Cavalier King Charles Spaniel	Female	Blenheim	2013-02-25	2010-02-23	3.01	b	Yes	Yes	No	Onbekend	Grade 2	3	0	Grade 2	5	1	0	1:C2-C3	3.2	0	2	3	0	D	Best	P	Yes	2
Cavalier King Charles Spaniel	Female	Blenheim	2013-11-06	2011-03-07	2.66	c	Yes	Good	no	No	Grade 2	3	0	Grade 0	1	1	0	2:C1-C6	0	0	0	0	1	A	Orion	M	No
Cavalier King Charles Spaniel	Male	Tricolour	2014-02-03	2012-10-04	1.33	c	Yes	Good	No	No	Grade 2	2	5	Grade 1	3	0	2	2:C2-C4	1.9	0	0	0	1	C	Best	P	No
Cavalier King Charles Spaniel	female (*)	Blenheim (*)	2011-02-24	2010-02-23	1	c	Unknown		Unknown	Unknown	Grade 2	3	0	Grade 0	0	0	0	2:C2-C4	0	0	0	0	0	C	Best		No
Cavalier King Charles Spaniel	Female	Blenheim	2010-11-17	2010-06-03	0.46	c	Unknown		No	Unknown	Grade 2	2	0	Grade 0	1	0	0	0	0	0	0	0	0	C	Best		Yes	2
Cavalier King Charles Spaniel	Female	Blenheim	2011-10-18	2010-06-03	1.38	c	Yes	Good	no	No info provided	Grade 2	2	0	Grade 0	1	0	0	2:C2-C4	0	0	0	0	0	C	Best		Yes	2
Cavalier King Charles Spaniel	Female	Blenheim	2014-10-28	2013-10-28	1	c	Yes	Good	No	No	Grade 2	3	2	Grade 0	1	0	0	2:C3	0	0	0	0	0	C	Best	M	No
Cavalier King Charles Spaniel	Female	Blenheim	2014-10-28	2013-10-28	1	c	Yes	Good	No	No	Grade 2	3	0	Grade 0	1	0	0	2:C1-C6	0	0	2	0	0	C	Best	M	No
Cavalier King Charles Spaniel	Male	Blenheim	2012-12-18	2011-12-17	1	c	Yes	Yes	No	Onbekend	Grade 2	3	2	Grade 0	1	0	0	0	0	3	0	0	0	C	Best	P	No
Cavalier King Charles Spaniel	Female	Blenheim	2012-02-29	2007-01-13	5.13	a	Yes	Good	No	No info provided	Grade 2	2	0	Grade 0	2	0	0	2:C2-C6	0	0	1	1	1	A	Best	L	No
Cavalier King Charles Spaniel	Female	Blenheim	2014-03-05	2012-04-18	1.88	c	Yes	Good	No	No	Grade 2	2	0	Grade 0	0	0	0	0	0	0	0	0	0	C	Best	M	No
Cavalier King Charles Spaniel	female (*)	Blenheim (*)	2011-03-14	2008-09-01	2.54	c	Unknown		Unknown	Unknown	Grade 2	3	0	Grade 2	4	1	2	1:C2-C3	2.1	0	0	2	1	D	Best		No
Cavalier King Charles Spaniel	Male	Blenheim	2015-04-02	2014-03-07	1.07	c	Yes	Yes	No	No	Grade 2	2	0	Grade 0	0	0	0	2:C1-C3	0	0	0	0	0	C	Best	M	No
Cavalier King Charles Spaniel			2007-04-25	1998-12-23	8.34	a	Unknown		Unknown	Unknown	Grade 2	2	0	Grade 0	1	0	0	0	0	0	0	0	1	A	Best		No
Cavalier King Charles Spaniel	Male	Blenheim	2012-05-03	2009-08-25	2.69	c	yes	Moderate	No	No murmur heared	Grade 2	3	0	Grade 1	3	0	0	2:C2-C5	0.5	0	3	3	1	A	Dordrecht	N	No
Cavalier King Charles Spaniel			2011-10-06	2008-09-22	3.04	b	Unknown		Unknown	Unknown	Grade 2	2	0	Grade 2	5	1	0	1:C3-C6	3.6	0	0	0	1	D	Best		No
Cavalier King Charles Spaniel	Male	Blenheim	2014-09-17	2013-09-10	1.02	c	Yes	Good	No	No	Grade 2	2	0	Grade 0	1	0	0	2:C1-C5	0	0	0	0	0	C	Best	P	No
Cavalier King Charles Spaniel	Male	Blenheim	2015-03-16	2013-11-26	1.31	c	Yes	Yes	No	No	Grade 2	2	0	Grade 0	1	0	0	0	0	1	0	0	1.5	C	Best	M	No
Cavalier King Charles Spaniel	Male	Black and Tan	2013-05-25	2008-11-12	4.54	b	Yes	Goed	No	Geen	Grade 2	2	0	Grade 2	3	1	1	2:C2-C5	0.5	1	0	0	1	D	Utrecht	M	No
Cavalier King Charles Spaniel	Female	Ruby	2012-01-06	2009-01-02	3.01	b	Yes	Could be better	No	No info provided	Grade 2	2	0	Grade 2	6	1	0	1:C2-C6	5.2	0	0	0	1	D	Best	Paul	No
Cavalier King Charles Spaniel	Female	Blenheim	2007-06-01	2006-10-01	0.67	c	Unknown		No	Unknown	Grade 2	2	0	Grade 0	1	0	0	0	0	0	0	0	1	C	Best		Yes	3
Cavalier King Charles Spaniel	Female	Blenheim	2009-08-07	2006-10-01	2.85	c	Unknown		No	Unknown	Grade 2	2	0	Grade 0	1	0	0	0	0	0	0	0	1	A	Best		Yes	3
Cavalier King Charles Spaniel	Female	Blenheim	2012-05-15	2006-10-01	5.62	a	yes	Good	No	No info provided	Grade 2	2	0	Grade 0	1	0	0	2:C2-C6	0	0	0	0	1	A	Best	M	Yes	3
Cavalier King Charles Spaniel			2011-09-16	2008-11-01	2.88	c	Unknown		Unknown	Unknown	Grade 2	3	0	Grade 1	3	1	0	1:C3-C5	1.1	0	1	3	1	A	Best		No
Cavalier King Charles Spaniel	female (*)	Black and tan (*)	2011-11-08	2008-12-15	2.9	c			Unknown	Unknown	Grade 2	3	0	Grade 0	2	0	0	2:C2-C5	0	0	0	0	1	A	Best		No
Cavalier King Charles Spaniel	female (*)	Blenheim (*)	2009-08-05	2007-05-25	2.19	c	Unknown		Unknown		Grade 2	3	0	Grade 0	1	0	0	0	0	0	0	0	1	C	Best		No
Cavalier King Charles Spaniel	Female	Tricolour	2013-11-14	2011-05-14	2.5	c	Yes	Good	no	No	Grade 2	3	0	Grade 0	1	0	0	2:C1-C6	0	0	0	0	1	A	Best	M	No
Cavalier King Charles Spaniel	female (*)		2011-07-07	2011-01-01	0.52	c	Unknown		Unknown	Unknown	Grade 2	2	0	Grade 1	3	0	0	2:C3-C4	1.1	0	0	0	1	C	Best		No
Cavalier King Charles Spaniel	male (*)	Blenheim (*)	2007-05-04	2006-04-17	1.05	c	Unknown		Unknown	Unknown	Grade 2	3	0	Grade 0	1	0	0	0	0	0	0	0	1	C	Best		Yes	2
Cavalier King Charles Spaniel	male (*)	Blenheim (*)	2008-11-24	2006-04-17	2.6	c	Unknown		Unknown	Unknown	Grade 2	3	0	Grade 2	5	0	0	1:C2-C5	3.2	0	0	0	1	D	Best		Yes	2
Cavalier King Charles Spaniel			2008-10-17	2003-12-12	4.85	b	Unknown		Unknown	Unknown	Grade 2	4	0	Grade 2	5	1	0	1:C2-C7	3.4	0	0	3	1	D	Best		No
Cavalier King Charles Spaniel	Female	Tricolour	2012-11-26	2010-05-24	2.51	c	Yes	Yes	No	Onbekend	Grade 2	2	0	Grade 0	0	0	0	0	0	0	0	0	0	A	Best	P	No
Cavalier King Charles Spaniel	male (*)	Black and tan (*)	2009-09-30	2007-03-31	2.5	c	Unknown		Unknown	Unknown	Grade 2	3	0	Grade 0	1	0	0	2:C2-C5	0	0	0	0	1	A	Best		No
Cavalier King Charles Spaniel	female (*)	Blenheim (*)	2011-07-25	2006-04-20	5.26	a	Unknown		Unknown	Unknown	Grade 2	3	0	Grade 2	4	1	0	1:C2-C3	2.5	0	0	0	1	D	Best		No
Cavalier King Charles Spaniel	female (*)	Tricolor (*)	2010-12-27	2007-11-10	3.13	b	Unknown		Unknown	Unknown	Grade 2	3	0	Grade 0	2	0	0	2:C2-C6	0	0	0	2	1.5	A	Best		No
Cavalier King Charles Spaniel	Female	Tricolour	2014-11-13	2012-03-09	2.68	c	Yes	Good	No	No	Grade 2	2	0	Grade 0	1	1	0	2:C1-C4	0	0	0	0	0	A	Best	M	No
Cavalier King Charles Spaniel	Female	Tricolour	2010-12-27	2009-06-26	1.5	c	Unknown		No	Unknown	Grade 2	2	0	Grade 0	1	0	0	0	0	0	0	0	0	C	Best		Yes	2
Cavalier King Charles Spaniel	Female	Tricolour	2012-05-24	2009-06-26	2.91	c	yes	Good	No	No info provided	Grade 2	3	0	Grade 0	1	0	0	2:C2-C6	0	0	2	2	0	A	Best	M	Yes	2
Cavalier King Charles Spaniel	female (*)	Blenheim (*)	2010-12-29	2008-05-19	2.61	c	Unknown		Unknown	Unknown	Grade 2	3	0	Grade 2	6	1	0	1:C3-C5	4.5	0	0	0	1	D	Best		No
Cavalier King Charles Spaniel	Female	Tricolour	2014-12-29	2013-12-27	1.01	c	Yes	Yes	No	No	Grade 2	3	0	Grade 0	0	0	0	0	0	0	0	0	0	C	Best	M	No
Cavalier King Charles Spaniel	Female	Tricolour	2015-09-14	2014-08-16	1.08	c	Yes	Yes	No	Unknown	Grade 2	3	0	Grade 0	0	0	0	0	0	0	0	0	0	C	Best	M	No
Cavalier King Charles Spaniel	Female	Tricolor	2012-01-26	2006-04-19	5.77	a	Yes	Poor quality	No	No info provided	Grade 2	3	0	Grade 1	3	1	0	1:C4-C5	1.6	0	0	0	1	A	Dordrecht	N	No
Cavalier King Charles Spaniel	Female	Tricolour	2015-08-11	2012-07-18	3.06	b	Yes	Yes	No	No	Grade 2	3	2	Grade 2	6	1	0	1:C2-C3	4.4	0	0	1	0	D	Best	M	No
Cavalier King Charles Spaniel	Male	Tricolor (*)	2011-07-27	2010-10-29	0.74	c	Unknown		Unknown	Unknown	Grade 2	2	0	Grade 0	1	0	0	0	0	0	0	0	0	C	Best		No
Cavalier King Charles Spaniel	Female	Blenheim	2011-12-22	2009-09-27	2.24	c	Yes	Good	No	No info provided	Grade 2	3	0	Grade 0	2	0	0	0	0	0	0	0	0	C	Best	Stefanie	Yes	2
Cavalier King Charles Spaniel	Female	Blenheim	2012-07-05	2009-09-27	2.77	c	yes	Good	No	No info provided	Grade 2	3	0	Grade 0	2	0	0	2:C2-C6	0	0	0	3	0	A	Best	L	Yes	2
Cavalier King Charles Spaniel	female (*)	Black and tan (*)	2009-11-25	2008-11-14	1.03	c	Unknown		Unknown	Unknown	Grade 2	3	0	Grade 0	1	0	0	2:C3-C4	0	0	0	0	1	C	Best		No
Cavalier King Charles Spaniel	Female	Black and Tan	2014-01-16	2012-07-03	1.54	c	Yes	Good	Present	No	Grade 2	2	0	Grade 1	3	1	0	1:C3	1	0	0	0	1	C	Best	P	Yes	2
Cavalier King Charles Spaniel	Female	Black and Tan	2015-10-19	2012-07-03	3.29	b	Yes	Yes	Present	Unknown	Grade 2	3	0	Grade 2	4	1	0	1:C3	3	0	0	0	1	D	Best	M	Yes	2
Cavalier King Charles Spaniel	Female	Tricolor	2012-02-02	2006-04-04	5.83	a	Yes	Good	No	No info provided	Grade 2	2	0	Grade 2	5	1	0	1:C2-C3	3.65	0	0	0	0	D	Dordrecht	N	No
Cavalier King Charles Spaniel	Female	Tricolour	2012-03-29	2009-12-05	2.32	c	yes	Good	No	No info provided	Grade 2	2	0	Grade 2	5	1	3	1:C2-C4	3.3	0	0	0	0	E	Best	M	Yes	2
Cavalier King Charles Spaniel	Female	Tricolour	2012-08-17	2009-12-05	2.7	c	yes	Good	No	No info provided	Grade 2	2	0	Grade 2	5	1	3	1:C2-C4	3	0	0	0	0	D	Best	M	Yes	2
Cavalier King Charles Spaniel	male (*)	Black and tan (*)	2009-09-30	2004-04-30	5.42	a	Unknown		Unknown	Unknown	Grade 2	2	0	Grade 0	1	0	0	0	0	0	3	0	0	A	Best		Yes	2
Cavalier King Charles Spaniel	male (*)	Black and tan (*)	2011-06-21	2004-04-30	7.14	a	Unknown		Unknown	Unknown	Grade 2	2	0	Grade 0	1	0	0	0	0	0	3	0	0	A	Best		Yes	2
Cavalier King Charles Spaniel	female (*)	Tricolor (*)	2007-06-30	2001-06-09	6.06	a	Unknown		Unknown	Unknown	Grade 2	4	0	Grade 2	4	1	0	1:C2-T3	2.6	2	3	3	0	D	Meppel		No
Cavalier King Charles Spaniel	Female	Tricolour	2014-09-19	2013-08-28	1.06	c	Yes	Good	No	No	Grade 2	2	0	Grade 0	1	0	0	2:C1-C4	0	0	0	0	0	C	Best	P	No
Cavalier King Charles Spaniel	Male	Blenheim	2011-08-10	2010-08-10	1	c	Unknown		No	Unknown	Grade 2	3	0	Grade 0	1	0	0	2:C2-C6	0	0	0	0	0	C	Best		Yes	3
Cavalier King Charles Spaniel	Male	Blenheim	2013-02-25	2010-08-10	2.54	c	Yes	Yes	No	Onbekend	Grade 2	2	1	Grade 0	1	0	0	2:C2-C4	0	0	0	3	1	A	Best	P	Yes	3
Cavalier King Charles Spaniel	Male	Blenheim	2015-08-31	2010-08-10	5.06	a	Yes	Yes	No	Unknown	Grade 2	3	0	Grade 0	2	0	0	2:C3-C4	0	0	0	0	1.5	A	Best	M	Yes	3
Cavalier King Charles Spaniel	Female	Blenheim	2011-09-16	2010-08-10	1.1	c	Unknown		No	Unknown	Grade 2	2	0	Grade 0	1	0	0	0	0	1	0	0	0	C	Best		Yes	2
Cavalier King Charles Spaniel	Female	Blenheim	2013-02-19	2010-08-10	2.53	c	Yes	Yes	No	Onbekend	Grade 2	3	0	Grade 0	1	0	0	2:C2-C4	0	0	0	0	0	A	Best	P	Yes	2
Cavalier King Charles Spaniel	male (*)	Blenheim (*)	2011-08-10	2010-08-10	1	c	Unknown		Unknown	Unknown	Grade 2	2	0	Grade 0	0	0	0	0	0	0	0	0	0	C	Best		No
Cavalier King Charles Spaniel	male (*)	Blenheim (*)	2011-08-10	2010-08-10	1	c	Unknown		Unknown	Unknown	Grade 2	3	0	Grade 0	2	0	0	2:C2-C6	0	0	0	0	0	C	Best		No
Cavalier King Charles Spaniel	Male	Blenheim	2012-12-18	2011-12-17	1	c	Yes	Yes	No	Onbekend	Grade 2	2	0	Grade 1	3	0	0	2:C2-C5	0.5	0	0	0	1	C	Best	P	Yes	2
Cavalier King Charles Spaniel	Male	Blenheim	2014-06-18	2011-12-17	2.5	c	Yes	Good	No	No	Grade 2	3	3	Grade 2	5	1	3	1:C2-C3	3	1	0	0	1	D	Best	M	Yes	2
Cavalier King Charles Spaniel	Female	White-Crème	2012-07-17	2009-08-18	2.91	c	yes	Good	No	No info provided	Grade 2	2	0	Grade 0	1	0	0	0	0	0	0	0	0	A	Best	L	No
Cavalier King Charles Spaniel	male (*)		2011-04-01	2010-01-27	1.18	c	Unknown		Unknown	Unknown	Grade 2	3	2	Grade 2	4	1	0	1:C2-C6	2.8	1	0	0	1	D	Best		No
Cavalier King Charles Spaniel	Male	Blenheim	2008-06-02	2006-11-06	1.57	c	Unknown		No	Unknown	Grade 2	3	0	Grade 0	1	0	0	2:C3-C4	0	0	0	0	0	C	Best		Yes	2
Cavalier King Charles Spaniel	Male	Blenheim	2012-10-30	2006-11-06	5.98	a	yes	Good	No	No info provided	Grade 2	3	0	Grade 1	3	0	0	2:C2-C6	0.5	0	2	2	0	A	Best	M	Yes	2
Cavalier King Charles Spaniel	female (*)	Black and tan (*)	2010-01-19	2007-06-09	2.61	c	Unknown		Unknown	Unknown	Grade 2	3	0	Grade 1	3	1	0	1:C2-C3	1.2	0	0	0	0	A	Best		No
Cavalier King Charles Spaniel	Male	Tricolour	2013-08-29	2008-09-22	4.94	a	Yes	Good	No	No	Grade 2	3	0	Grade 1	3	1	0	1:C2-C3	1.3	0	1	1	0	A	Best	M	No
Cavalier King Charles Spaniel			2008-10-16	2008-03-09	0.6	c	Unknown		Unknown	Unknown	Grade 2	3	0	Grade 0	1	0	0	0	0	0	0	0	0	C	Best		No
Cavalier King Charles Spaniel	female (*)	Tricolor (*)	2007-06-30	2000-08-02	6.91	a	Unknown		Unknown	Unknown	Grade 2	4	0	Grade 2	5	1	0	1:C2-T3	3.6	0	0	3	0	D	Meppel		No
Cavalier King Charles Spaniel	male (*)	Blenheim (*)	2011-05-04	2007-12-22	3.37	b	Unknown		Unknown	Unknown	Grade 2	3	0	Grade 0	1	0	0	0	0	0	2	0	1	A	Drachten		No
Cavalier King Charles Spaniel	female (*)	Ruby (*)	2009-10-20	2007-03-31	2.56	c	Unknown		Unknown	Unknown	Grade 2	3	0	Grade 0	0	0	0	0	0	0	0	0	0	A	Best		No
Cavalier King Charles Spaniel	female (*)	Tricolor (*)	2010-11-19	2009-06-23	1.41	c			Unknown		Grade 2	3	0	Grade 1	3	1	0	1:C3	1.2	0	0	0	1	C	Best		No
Cavalier King Charles Spaniel	Male	Tricolour	2012-08-08	2010-07-10	2.08	c	yes	Good	No	No info provided	Grade 2	3	0	Grade 1	3	1	0	0	1	0	0	0	1.5	C	Best	M	No
Cavalier King Charles Spaniel	Female	Black and Tan	2012-11-15	2006-02-18	6.74	a	yes	Good	No	No info provided	Grade 2	3	0	Grade 0	2	0	0	2:C2-C6	0	0	0	2	0	A	Best	M	No
Cavalier King Charles Spaniel	Male	Tricolor	2012-10-17	2010-03-24	2.56	c	yes	Good	No	No info provided	Grade 2	3	0	Grade 1	3	0	1	2:C4	1.79	0	0	0	1	A	Best	M	No
Cavalier King Charles Spaniel	Female	Blenheim	2012-06-12	2011-06-09	1.01	c	yes	Poor	No	No info provided	Grade 2	3	0	Grade 1	2	0	0	0	0.5	0	0	0	0	C	Best	P	No
Cavalier King Charles Spaniel	female (*)	Black and tan (*)	2011-05-26	2008-09-11	2.71	c	Unknown		Unknown	Unknown	Grade 2	3	0	Grade 1	3	0	0	2:C1-C4	0.5	0	0	0	1	A	Best		No
Cavalier King Charles Spaniel	female (*)		2009-01-13	2002-03-28	6.79	a	Unknown		Unknown	Unknown	Grade 2	3	0	Grade 0	0	0	0	0	0	0	0	0	1	A	Best		No
Cavalier King Charles Spaniel	Male	Tricolour	2015-12-21	2014-07-02	1.47	c	Yes	Yes	no	Unknown	Grade 2	3	0	Grade 0	1	0	0	0	0	0	0	0	1.5	C	Best	M	No
Cavalier King Charles Spaniel	Male	Blenheim	2014-12-29	2012-02-01	2.91	c	Yes	Yes	No	No	Grade 2	2	0	Grade 0	1	0	0	2:C3-C4	0	0	0	0	1.5	A	Best	M	No
Cavalier King Charles Spaniel	female (*)	Blenheim (*)	2008-01-07	2003-12-21	4.04	b	Unknown		Unknown	Unknown	Grade 2	2	2	Grade 2	5	1	0	1:C2-C5	4		0	0	1	D	Best		No
Cavalier King Charles Spaniel	Male	Blenheim	2012-02-10	2011-02-03	1.02	c	ja	Goed	No	Geen informatie vermeld	Grade 2	2	0	Grade 0	2	0	0	2:C2-C4	0	0	0	0	0	C	Best	N	Yes	2
Cavalier King Charles Spaniel	Male	Blenheim	2013-08-16	2011-02-03	2.54	c	Yes	Good	No	No	Grade 2	3	0	Grade 0	1	0	0	2:C2-C5	0	0	1	0	0	A	Best	M	Yes	2
Cavalier King Charles Spaniel	female (*)	Blenheim (*)	2010-12-30	2006-10-06	4.23	b	Unknown		Unknown	Unknown	Grade 2	3	0	Grade 0	2	0	0	2:C2-C4	0	0	1	0	1	A	Best		No
Cavalier King Charles Spaniel	female (*)	Black and tan (*)	2011-02-04	2007-10-25	3.28	b	Unknown		Unknown	Unknown	Grade 2	3	0	Grade 2	4	1	0	1:C2-C3	2.6	0	0	1	1	D	Best		No
Cavalier King Charles Spaniel			2010-05-18	2007-11-27	2.48	c	Unknown		Unknown	Unknown	Grade 2	2	0	Grade 0	2	0	0	2:C2-C5	0	0	0	0	1	A	Best		No
Cavalier King Charles Spaniel	female (*)	Blenheim (*)	2011-06-14	2008-12-12	2.51	c	Unknown		Unknown	Unknown	Grade 2	3	0	Grade 0	1	0	0	2:C2-C3	0	0	0	0	1	A	Best		No
Cavalier King Charles Spaniel	Female	Tricolour	2015-02-11	2013-11-13	1.24	c	Yes	Yes	No	No	Grade 2	3	0	Grade 0	1	0	0	2:C3-C5	0	0	0	0	0	C	Best	M	No
Cavalier King Charles Spaniel	male (*)	Tricolor (*)	2010-10-25	2008-12-12	1.87	c	Unknown		Unknown	Unknown	Grade 2	3	0	Grade 0	0	0	0	0	0	0	1	2	1	C	Best		Yes	2
Cavalier King Charles Spaniel	male (*)	Tricolor (*)	2011-06-14	2008-12-12	2.51	c	Unknown		Unknown	Unknown	Grade 2	3	0	Grade 0	0	0	0	0	0	0	1	2	1	A	Best		Yes	2
Cavalier King Charles Spaniel	female (*)	Tricolor (*)	2011-03-07	2006-03-19	4.97	a	Unknown		Unknown	Unknown	Grade 2	2	0	Grade 0	1	0	0	2:C1-C5	0	0	0	0	1	A	Best		No
Cavalier King Charles Spaniel	Female	Blenheim	2013-10-11	2012-05-24	1.38	c	Yes	Good	no	No	Grade 2	2	0	Grade 0	1	0	0	2:C2-C4	0	0	0	0	0	C	Best	M	Yes	2
Cavalier King Charles Spaniel	Female	Blenheim	2015-03-24	2012-05-24	2.83	c	Yes	Yes	No	No	Grade 2	2	0	Grade 0	0	0	0	0	0	0	0	1	0	A	Best	M	Yes	2
Cavalier King Charles Spaniel	Female	Tricolour	2013-09-09	2012-08-28	1.03	c	Yes	Good	No	No	Grade 2	3	0	Grade 0	1	0	0	2:C2-C5	0	0	0	0	0	C	Best	M	Yes	2
Cavalier King Charles Spaniel	Female	Tricolour	2015-03-02	2012-08-28	2.51	c	Yes	Yes	No	No	Grade 2	2	0	Grade 0	0	0	0	0	0	0	0	0	0	A	Best	M	Yes	2
Cavalier King Charles Spaniel	female (*)	Blenheim (*)	2008-02-27	2006-11-18	1.28	c	Unknown		Unknown	Unknown	Grade 2	3	0	Grade 0	0	0	0	0	0	0	0	3	1.5	C	Best		Yes	2
Cavalier King Charles Spaniel	female (*)	Blenheim (*)	2010-11-17	2006-11-18	4	b	Unknown		Unknown	Unknown	Grade 2	3	0	Grade 0	1	0	0	2:C2-C4	0	0	3	3	1	A	Best		Yes	2
Cavalier King Charles Spaniel	Female	Tricolor	2011-11-17	2009-03-19	2.66	c	Yes	Good	no	No info provided	Grade 2	2	0	Grade 1	3	0	0	2:C1-C5	0.5	0	0	0	1	A	Best		No
Cavalier King Charles Spaniel	Female	Blenheim	2013-06-27	2012-06-21	1.02	c	Yes	A chip artefact is visible at the level of C4-C5	No	Geen	Grade 2	3	1	Grade 1	3	0	0	2:C2-C5	1	0	0	0	1	C	Best	M	No
Cavalier King Charles Spaniel	Female	Black and Tan	2012-02-29	2010-07-11	1.63	c	ja	Goed	No	Geen hartruis (1ste lijns dierenarts)	Grade 2	3	0	Grade 0	2	0	0	2:C2-C6	0	0	0	0	0	C	Best	L	Yes	2
Cavalier King Charles Spaniel	Female	Black and Tan	2013-04-26	2010-07-11	2.79	c			No		Grade 2	3	0	Grade 1	3	0	0	2:C2-C4	1	0	0	0	0	A	Best		Yes	2
Cavalier King Charles Spaniel			2007-08-17	2002-05-17	5.25	a	Unknown		Unknown	Unknown	Grade 2	3	2	Grade 1	3	0	0	2:C2-C4	1.1	0	1	1	1	A	Best		No
Cavalier King Charles Spaniel	Male	Black and Tan	2013-08-29	2010-12-02	2.74	c	Yes	Good	No	No	Grade 2	4	0	Grade 1	3	1	0	1:C1-C3	1.3	0	0	0	1	A	Best	M	No
Cavalier King Charles Spaniel	Female	Blenheim	2014-10-20	2013-10-18	1.01	c	Yes	Good	No	No	Grade 2	2	1	Grade 0	2	0	0	1:C2-C5	0	1	0	0	1	C	Best	M	No
Cavalier King Charles Spaniel	Female	Black and Tan	2012-11-02	2010-05-01	2.5	c	yes	Good	No	No info provided	Grade 2	2	0	Grade 0	1	0	0	0	0	0	0	0	0	A	Best	M	No
Cavalier King Charles Spaniel	Female	Blenheim	2012-08-07	2006-07-01	6.1	a	yes	Good	No	No info provided	Grade 2	2	0	Grade 1	3	1	0	1:C2-C6	1.4	0	0	2	0	A	Best	M	No
Cavalier King Charles Spaniel	Female	Tricolour	2014-08-05	2013-04-22	1.29	c	Yes	Good	No	No	Grade 2	3	0	Grade 0	1	0	0	2:C2	0	0	0	0	1	C	Best	M	No
Cavalier King Charles Spaniel	Male	Blenheim	2015-05-18	2014-04-07	1.11	c	Yes	Yes	No	No	Grade 2	3	1	Grade 0	0	0	0	0	0	0	0	0	0	C	Best	M	No
Cavalier King Charles Spaniel	Female	Black and Tan	2015-09-17	2014-05-19	1.33	c	Yes	Yes	No	Unknown	Grade 2	3	2	Grade 0	2	0	0	2:C2-C5	0	0	0	0	0	C	Best	M	No
Cavalier King Charles Spaniel	Female	Blenheim	2014-12-17	2013-03-09	1.77	c	Yes	Yes	No	No	Grade 2	3	0	Grade 0	0	0	0	0	0	0	0	0	0	C	Best	M	Yes	2
Cavalier King Charles Spaniel	Female	Blenheim	2015-12-18	2013-03-09	2.78	c	Yes	Yes	no	Unknown	Grade 2	3	0	Grade 0	1	0	0	0	0	0	0	0	0	A	Best	M	Yes	2
Cavalier King Charles Spaniel	female (*)	Tricolor (*)	2004-09-18	2003-08-31	1.05	c	Unknown		Unknown	Unknown	Grade 2	3	3	Grade 2	5	1	0	1:C2	4	0	0	0	1	E	Meppel		No
Cavalier King Charles Spaniel	Female	Blenheim	2014-02-03	2012-09-23	1.36	c	Yes	Good	No	No	Grade 2	3	5	Grade 1	3	0	2	2:C3	1	0	0	0	1	C	Best	P	Yes	2
Cavalier King Charles Spaniel	Female	Blenheim	2015-05-21	2012-09-23	2.66	c	Yes	Yes	No	No	Grade 2	3	0	Grade 1	3	0	1	2:C3-C4	1	0	0	0	1.5	A	Best	M	Yes	2
Cavalier King Charles Spaniel	Male castrated	Blenheim	2015-07-16	2011-03-04	4.37	b	Yes	Yes	Present	No	Grade 2	2	0	Grade 1	2	1	0	1:C1-C2	0.8	0	0	0	0	F	Dordrecht	M	No
Cavalier King Charles Spaniel	Female	Black and Tan	2012-10-12	2010-02-09	2.68	c	yes	Good	No	No info provided	Grade 2	3	0	Grade 0	2	0	0	2:C2-C6	0	0	1	1	1	A	Best	M	No
Cavalier King Charles Spaniel	female (*)	Black and tan (*)	2011-03-21	2010-10-25	0.41	c	Unknown		Unknown	Unknown	Grade 2	3	0	Grade 1	3	1	0	1:C2	1	0	0	0	1.5	C	Best		No
Cavalier King Charles Spaniel	Female	Ruby	2013-08-29	2010-09-27	2.92	c	Yes	Poor	No	No	Grade 2	3	0	Grade 0	1	0	0	0	0	0	1	1	0	A	Best	M	No
Cavalier King Charles Spaniel	Female	Tricolour	2012-04-24	2009-10-20	2.51	c	yes	Good	No	No info provided	Grade 2	3	0	Grade 1	3	0	0	0	1	0	0	0	0	A	Best	P	No
Cavalier King Charles Spaniel	Teef	Ruby	2012-01-27	2009-03-20	2.85	c	ja	Storing artefact!	Unknown	Geen informatie vermeld	Grade 2	3	0	Grade 1	3	0	0	2:C2-C5	0.5	0	0	0	1.5	A	Best	N	No
Cavalier King Charles Spaniel	Female	Tricolor	2008-06-02	2006-10-30	1.59	c	Unknown		No	Unknown	Grade 2	3	0	Grade 1	3	1	0	1:C3	1.5	0	0	0	1.5	C	Best		Yes	2
Cavalier King Charles Spaniel	Female	Tricolor	2012-10-30	2006-10-30	6	a	yes	Good	No	No info provided	Grade 2	3	0	Grade 1	3	1	0	1:C3	1.4	0	0	0	1	A	Best	M	Yes	2
Cavalier King Charles Spaniel	Female	Ruby	2013-07-25	2011-04-05	2.31	c	Yes	Good	No	No	Grade 2	3	1	Grade 2	6	1	0	1:C2-C4	5.5	3	1	2	0	E	Best	M	Yes	2
Cavalier King Charles Spaniel	Female	Ruby	2014-03-03	2011-04-05	2.91	c	Yes	Good	No	No	Grade 2	3	0	Grade 2	6	1	0.3	1:C2-C4	5.9	3	1	0	0	D	Best	M	Yes	2
Cavalier King Charles Spaniel	Female	Tricolor	2011-06-14	2009-11-08	1.6	c	Unknown		No	Unknown	Grade 2	3	0	Grade 0	0	0	0	0	0	0	0	2	1	C	Best		Yes	2
Cavalier King Charles Spaniel	Female	Tricolor	2012-10-31	2009-11-08	2.98	b	yes	Good	No	No info provided	Grade 2	2	0	Grade 0	1	0	0	0	0	0	0	2	1	A	Best	M	Yes	2
Cavalier King Charles Spaniel			2010-10-27	2009-04-28	1.5	c	Unknown		Unknown	Unknown	Grade 2	3	0	Grade 0	0	0	0	0	0	0	1	1	1	C	Best		No
Cavalier King Charles Spaniel	Male	Blenheim	2011-10-03	2006-06-08	5.32	a	Yes	Good	no	No info provided	Grade 2	3	0	Grade 0	1	0	0	2:C2-C4	0	0	0	1	1	A	Best		No
Cavalier King Charles Spaniel	female (*)	Tricolor (*)	2011-02-01	2006-05-20	4.7	b	Unknown		Unknown	Unknown	Grade 2	3	0	Grade 0	0	0	0	0	0	0	2	2	1	A	Best		Yes	2
Cavalier King Charles Spaniel	female (*)	Tricolor (*)	2008-07-15	2006-05-20	2.15	c	Unknown		Unknown	Unknown	Grade 2	3	0	Grade 0	1	0	0	2:C2-C5	0	1	0	1	1.5	C	Best		Yes	2
Cavalier King Charles Spaniel	Female	Ruby	2013-08-22	2010-09-27	2.9	c	Yes	Good	No	No	Grade 2	2	0	Grade 1	3	1	0	1:C3	1.5	0	1	2	1	A	Best	M	No
Cavalier King Charles Spaniel	Female	Ruby	2010-11-17	2010-05-05	0.53	c	Unknown		No	Unknown	Grade 2	3	0	Grade 0	0	0	0	0	0	0	0	0	2	C	Best		Yes	2
Cavalier King Charles Spaniel	Female	Ruby	2012-11-06	2010-05-05	2.5	c	yes	An artefact at C4 of the chip!!	No	No info provided	Grade 2	3	0							0	0	2	2		Best	M	Yes	2
Cavalier King Charles Spaniel	Female	Ruby	2013-08-29	2010-07-02	3.16	b	Yes	Good	No	No	Grade 2	3	0	Grade 0	1	0	0	2:C2-C5	0	0	2	2	0	A	Best	M	No
Cavalier King Charles Spaniel	female (*)	Ruby (*)	2009-08-27	2007-10-27	1.83	c	Unknown		Unknown	Unknown	Grade 2	3	2	Grade 1	3	0	0	2:C2-C5	1	0	0	0	0	C	Best		Yes	2
Cavalier King Charles Spaniel	female (*)	Ruby (*)	2011-01-28	2007-10-27	3.25	b	Unknown		Unknown	Unknown	Grade 2	3	0	Grade 2	4	1	3	1:C2-C3	2	0	0	0	1	D	Best		Yes	2
Cavalier King Charles Spaniel	Male	Blenheim	2014-12-16	2013-12-15	1	c	Yes	Yes	No	No	Grade 2	3	0	Grade 0	1	0	0	0	0	0	0	0	0	C	Best	M	No
Cavalier King Charles Spaniel	Female	Blenheim	2015-06-22	2013-12-15	1.52	c	Yes	Yes	No	No	Grade 2	2	0	Grade 1	2	0	2	2:C2-C5	0.8	0	0	0	1	C	Best	M	No
Cavalier King Charles Spaniel	Female	Blenheim	2015-02-11	2013-12-15	1.16	c	Yes	Yes	No	No	Grade 2	3	0	Grade 0	1	0	0	2:C3-C5	0	0	0	0	0	C	Best	M	No
Cavalier King Charles Spaniel	Female	Black and Tan	2013-12-12	2011-04-22	2.64	c	Yes	Good	No	No	Grade 2	2	2	Grade 1	2	0	3	2:C1-C3	0.6	0	0	0	0	A	Best	P	No
Cavalier King Charles Spaniel	female (*)	Blenheim (*)	2010-08-05	2007-10-08	2.83	c	Unknown		Unknown	Unknown	Grade 2	3	0	Grade 1	2	0	0	2:C2-C3	1	0	1	1	1	A	Best		No
Cavalier King Charles Spaniel	Male	Tricolour	2015-10-28	2013-07-22	2.27	c	Yes	Yes	No	Unknown	Grade 2	3	0	Grade 1	3	0	0	2:C3	1.1	0	0	2	0	C	Best	M	No
Cavalier King Charles Spaniel	male (*)	Tricolor (*)	2009-11-25	2005-03-08	4.71	b	Unknown		Unknown	Unknown	Grade 2	3	0	Grade 2	6	1	0	1:C2-C6	4.3	1	0	3	1	D	Best		No
Cavalier King Charles Spaniel	female (*)	Tricolor (*)	2010-10-27	2009-06-12	1.38	c	Unknown		Unknown	Unknown	Grade 2	2	0	Grade 0	0	0	0	0	0	0	0	0	1	C	Best		No
Cavalier King Charles Spaniel	female (*)	Tricolor (*)	2011-12-09	2008-12-19	2.97	b			Unknown		Grade 2	3	0	Grade 1	2	0	0	2:C2-C5	0.5	0	2	0	1	A	Best		No
Cavalier King Charles Spaniel	Female	Tricolour	2012-05-04	2010-02-03	2.25	c	yes	Good	Present	No murmur heared	Grade 2	3	0	Grade 2	4	1	0	1:C2-T3	3.5	3	0	0	1	F	Drachten	M	No
Cavalier King Charles Spaniel	female (*)	Tricolor (*)	2011-10-24	2007-02-07	4.71	b			Unknown		Grade 2	3	0	Grade 1	2	0	0	2:C2-C5	0.5	0	1	2	1	A	Best		No
Cavalier King Charles Spaniel	Male	Ruby	2013-11-15	2011-05-03	2.53	c	Yes	Good	No	No	Grade 2	3	0	Grade 2	5	1	0	1:C3-C4	3	0	3	0	0	D	Best	M	No
Cavalier King Charles Spaniel	Male	Tricolour	2011-03-29	2009-11-19	1.36	c	Unknown		No	Unknown	Grade 2	3	0	Grade 1	2	0	0	2:C2-C4	0.5	0	0	0	1	C	Best		Yes	2
Cavalier King Charles Spaniel	Male	Tricolour	2012-08-09	2009-11-19	2.72	c	yes	Good	No	No info provided	Grade 2	3	0	Grade 1	3	0	0	2:C2-C6	1	0	0	1	0	A	Best	M	Yes	2
Cavalier King Charles Spaniel	Female	Blenheim	2014-04-30	2012-12-18	1.37	c	Yes	Good	No	No	Grade 2	3	0	Grade 0	1	0	0	2:C1-C3	0	0	0	0	0	C	Best	M	Yes	2
Cavalier King Charles Spaniel	Female	Blenheim	2015-07-01	2012-12-18	2.54	c	Yes	Yes	No	No	Grade 2	2	0	Grade 2	4	1	0	1:C3-C4	2	0	0	0	1	D	Best	M	Yes	2
Cavalier King Charles Spaniel	female (*)	Tricolor (*)	2011-11-16	2009-09-06	2.19	c			Unknown		Grade 2	3	0	Grade 2	4	1	0	1:C2-C3	3.4	0	0	0	1	E	Best		No
Cavalier King Charles Spaniel	Female	Blenheim	2013-02-14	2009-09-06	3.44	b	Yes	Yes	No	Onbekend	Grade 2	3	0	Grade 1	3	1	0	1:C2	1.7	0	0	2	0	A	Best	P	No
Cavalier King Charles Spaniel	male (*)	Black and tan (*)	2009-12-01	2007-05-26	2.51	c	Unknown		Unknown	Unknown	Grade 1	1	0	Grade 0	1	0	0	0	0	0	3	0	1	A	Best		No
Cavalier King Charles Spaniel	Female	Ruby	2015-10-29	2012-04-16	3.54	b	Yes	Yes	No	Unknown	Grade 2	3	0	Grade 1	3	1	0	1:C3	1.1	0	0	0	1	A	Drachten	M	No
Cavalier King Charles Spaniel	Male	Ruby	2012-08-08	2007-07-23	5.04	a	yes	Good	No	No info provided	Grade 2	3	0	Grade 1	3	0	0	2:C2-C6	1	0	0	0	0	D	Dordrecht	M	No
Cavalier King Charles Spaniel	Female	Blenheim	2014-07-21	2013-03-05	1.38	c	Yes	Good	No	No	Grade 2	3	2	Grade 0	1	0	0	2:C2-C4	0	0	0	0	0	C	Best	M	Yes	2
Cavalier King Charles Spaniel	Female	Blenheim	2015-12-15	2013-03-05	2.78	c	Yes	Yes	no	Unknown	Grade 2	3	0	Grade 0	1	0	0	2:C3-C5	0	0	0	1	0	A	Best	M	Yes	2
Cavalier King Charles Spaniel	Male	Blenheim	2015-08-03	2014-03-22	1.36	c	Yes	Yes	No	No	Grade 2	3	0	Grade 0	0	0	0	0	0	0	0	0	0	C	Best	M	No
Cavalier King Charles Spaniel	Male	Black and Tan	2015-08-03	2014-06-13	1.14	c	Yes	Yes	No	No	Grade 2	2	0	Grade 0	0	0	0	0	0	0	0	2	1	C	Best	M	No
Cavalier King Charles Spaniel	female (*)	Blenheim (*)	2008-04-11	2007-08-22	0.64	c	Unknown		Unknown	Unknown	Grade 2	2	0	Grade 0	2	0	0	2:C2-C5	0	0	0	0	0	C	Best		No
Cavalier King Charles Spaniel	female (*)	Blenheim (*)	2010-01-22	2007-06-09	2.62	c	Unknown		Unknown	Unknown	Grade 2	3	0	Grade 2	6	1	0	1:C2-C6	5.4	1	0	0	1	D	Best		No
Cavalier King Charles Spaniel	teef	Tricolor	2012-03-21	2010-07-16	1.68	c	ja	Goed	No	Geen hartruis (1ste lijns dierenarts)	Grade 2	3	0	Grade 0	2	0	0	2:C2-C6	0	0	0	0	0	C	Best	L	No
Cavalier King Charles Spaniel	Female	Blenheim	2011-12-13	2008-07-13	3.42	b	Yes	Good	no	No info provided	Grade 2	3	0	Grade 2	4	1	0	1:C3-C4	2.2	0	0	0	1	D	Best	Stefanie	No
Cavalier King Charles Spaniel	Female	Blenheim	2014-07-22	2013-03-12	1.36	c	Yes	Good	No	No	Grade 2	3	4	0	2	0	0	2:C1-C5	0	0	1	2	1	C	Drachten	M	Yes	2
Cavalier King Charles Spaniel	Female	Blenheim	2015-09-17	2013-03-11	2.52	c	Yes	Yes	No	Unknown	Grade 2	3	0	Grade 0	2	0	0	0	0	0	0	3	0	A	Best	M	Yes	2
Cavalier King Charles Spaniel	Male	Black and Tan	2012-04-02	2009-07-15	2.71	c	yes	Good	No	No info provided	Grade 2	2	0	Grade 0	1	0	0	0	0	0	0	0	0	A	Best	N	No
Cavalier King Charles Spaniel	Female	Tricolor	2011-06-14	2010-01-28	1.38	c	Unknown		No	Unknown	Grade 2	3	0	Grade 0	0	0	0	0	0	0	0	1	1	C	Best		Yes	2
Cavalier King Charles Spaniel	Female	Tricolor	2012-10-31	2010-01-28	2.76	c	yes	Good	No	No info provided	Grade 2	3	0	Grade 1	3	0	0	2:C2-C4	1.5	0	0	0	1	A	Best	M	Yes	2
Cavalier King Charles Spaniel	female (*)	Blenheim (*)	2011-09-08	2007-12-27	3.7	b	Unknown		Unknown	Unknown	Grade 2	2	0	Grade 0	1	0	0	0	0	0	3	3	1	A	Best		No
Cavalier King Charles Spaniel	Female	Blenheim	2014-09-26	2011-10-05	2.98	c	Yes	Good	No	No	Grade 2	2	1	Grade 0	2	0	0	2:C3-C4	0	0	1	1	1	A	Best	M	No
Cavalier King Charles Spaniel	female (*)	Blenheim (*)	2010-12-29	2008-03-25	2.76	c	Unknown		Unknown	Unknown	Grade 2	3	0	Grade 0	0	0	0	0	0	0	0	0	1	A	Best		No
Cavalier King Charles Spaniel	Female	Ruby	2012-05-16	2009-05-03	3.04	b	yes	Good	No	No info provided	Grade 2	3	0	Grade 2	4	1	0	1:C2-C4	2.38	0	0	0	0	D	Best	M	No
Cavalier King Charles Spaniel	Male	Blenheim	2013-01-24	2011-07-22	1.51	c	Yes	Yes	No	Onbekend	Grade 2	3	0	Grade 0	1	0	0	2:C2-C4	0	0	0	0	1	C	Best	M	No
Cavalier King Charles Spaniel	Female	Blenheim	2015-09-14	2014-06-28	1.21	c	Yes	Yes	No	Unknown	Grade 2	3	0	Grade 0	2	0	0	2:C2-C3	0	0	0	0	0	C	Best	M	No
Cavalier King Charles Spaniel	Female	Blenheim	2011-12-20	2008-12-07	3.04	b	Yes	Good	No	No info provided	Grade 2	3	0	Grade 1	3	1	0	1:C3	1.6	0	3	3	1	A	Best	Stefanie	No
Cavalier King Charles Spaniel	female (*)	Blenheim (*)	2009-06-08	2006-04-08	3.17	b	Unknown		Unknown	Unknown	Grade 2	3	0	Grade 0	2	0	0	2:C1-C6	0	0	0	0	0	A	Best		No
Cavalier King Charles Spaniel	Female	Blenheim	2014-05-22	2013-04-03	1.14	c	Yes	Good	No	No	Grade 2	2	0	Grade 0	1	0	0	2:C3-C4	0	0	0	0	0	C	Best	M	Yes	2
Cavalier King Charles Spaniel	Female	Blenheim	2015-11-17	2013-04-03	2.62	c	Yes	Yes	No	Unknown	Grade 2	3	0	Grade 0	2	0	0	2:C2-C6	0	0	0	0	1.5	A	Best	M	Yes	2
Cavalier King Charles Spaniel	female (*)	Blenheim (*)	2011-09-16	2008-11-04	2.87	c	Unknown		Unknown	Unknown	Grade 2	3	0	Grade 0	1	0	0	2:C2-C4	0	0	2	0	1	A	Best		No
Cavalier King Charles Spaniel	Male	Blenheim	2014-02-28	2013-02-27	1	c	Yes	Good	No	No	Grade 2	3	0	Grade 0	1	0	0	2:C2-C3	0	2	0	0	0	C	Best	M	No
Cavalier King Charles Spaniel	female (*)	Ruby (*)	2010-01-25	2006-12-01	3.15	b	Unknown		Unknown	Unknown	Grade 2	3	0	Grade 1	3	1	0	1:C3	1.3	1	1	1	1.5	A	Best		No
Cavalier King Charles Spaniel	Female	Tricolor	2011-12-20	2008-07-14	3.43	b	Yes	Not good	No	No info provided	Grade 2	2	0	Grade 0	2	0	0	2:C2-C5	0	0	0	0	0	A	Best	Stefanie	No
Cavalier King Charles Spaniel	Female	Blenheim	2014-10-21	2012-12-06	1.88	c	Yes	Good	No	No	Grade 2	2	1	Grade 0	2	0	0	2:C2	0	0	0	2	1	C	Best	M	Yes	2
Cavalier King Charles Spaniel	Female	Blenheim	2015-07-21	2012-12-06	2.63	c	Yes	Yes	No	No	Grade 2	2	0	Grade 0	0	0	0	0	0	0	1	1	1.5	A	Best	M	Yes	2
Cavalier King Charles Spaniel	Female	Blenheim	2012-06-26	2009-12-25	2.5	c	yes	Good	No	No info provided	Grade 2	3	0	Grade 0	2	0	0	2:C2-C6	0	0	0	1	1	A	Best	L	No
Cavalier King Charles Spaniel	Female	Tricolour	2012-08-07	2008-01-06	4.59	b	yes	Good	No	No info provided	Grade 2	2	0	Grade 1	3	1	0	1:C3	1.3	0	2	2	0	A	Best	M	No
Cavalier King Charles Spaniel	Female	Tricolour	2013-10-08	2011-11-27	1.86	c	Yes	Good	no	No	Grade 2	3	1	Grade 2	4	1	0	2:C2-C4	3	0	0	0	1	E	Best	M	Yes	2
Cavalier King Charles Spaniel	Female	Tricolour	2015-03-05	2011-11-27	3.27	b	Yes	Yes	No	No	Grade 2	4	1	Grade 2	5	1	0	1:C2-C4	3	0	0	0	0	D	Best	M	Yes	2
Cavalier King Charles Spaniel	Female	Black and Tan	2014-11-14	2013-02-07	1.77	c	Yes	Good	No	No	Grade 2	3	1	Grade 0	1	0	0	2:C3-C6	0	0	0	0	0	C	Best	M	No
Cavalier King Charles Spaniel	Male	Ruby	2011-05-27	2008-11-22	2.51	c	Yes	Yes	No	Unknown	Grade 2	4	0	Grade 1	3	0	0	2:C2-C5	1	0	3	3	0	A	Best	M	No
Cavalier King Charles Spaniel	Female	Tricolor	2011-04-19	2010-04-16	1.01	c	Unknown		No	Unknown	Grade 2	3	0	Grade 0	1	0	0	0	0	0	0	0	1	C	Best		Yes	2
Cavalier King Charles Spaniel	Female	Tricolor	2012-10-19	2010-04-16	2.51	c	yes	Good	No	No info provided	Grade 2	2	0	Grade 0	1	0	0	0	0	0	0	0	1	A	Best	M	Yes	2
Cavalier King Charles Spaniel	Female	Blenheim	2015-05-27	2013-10-07	1.64	c	Yes	Yes	No	No	Grade 2	2	0	Grade 2	5	1	3	1:C2-C3	3.5	0	3	0	0	E	Drachten	M	No
Cavalier King Charles Spaniel	female (*)	Blenheim (*)	2011-04-26	2008-03-25	3.09	b	Unknown		Unknown	Unknown	Grade 2	3	0	Grade 1	2	0	0	2:C2-C5	0.5	0	0	3	1	A	Best		No
Cavalier King Charles Spaniel	female (*)	Tricolor (*)	2011-10-24	2008-08-02	3.23	b			Unknown		Grade 2	3	0	Grade 1	2	0	0	2:C2-C5	0.5	0	0	0	1	A	Best		No
Cavalier King Charles Spaniel	female (*)	Tricolor (*)	2011-10-24	2008-08-02	3.23	b			Unknown		Grade 2	3	0	Grade 2	5	1	0	1:C2-C3	2.9	0	2	1	1	D	Best		No
Cavalier King Charles Spaniel	female (*)	Tricolor (*)	2011-10-24	2011-05-13	0.45	c			Unknown		Grade 2	2	0	Grade 0	0	0	0	0	0	0	0	0	1	C	Best		No
Cavalier King Charles Spaniel	male (*)		2006-02-11	2005-05-21	0.72	c	Unknown		Unknown	Unknown	Grade 1	1	0	Grade 0	1	0	0	2:C2-C4	0	0	0	0	0	C	Best		Yes	3
Cavalier King Charles Spaniel	male (*)		2008-01-26	2005-05-21	2.68	c	Unknown		Unknown	Unknown	Grade 1	1	0	Grade 0	1	0	0	2:C2-C4	0	0	0	0	0	A	Meppel		Yes	3
Cavalier King Charles Spaniel	male (*)		2011-07-06	2005-05-21	6.13	a	Unknown		Unknown	Unknown	Grade 2	2	0	Grade 0	1	0	0	2:C2-C6	0	0	2	2	1	A	Best		Yes	3
Cavalier King Charles Spaniel	Male	Blenheim	2013-04-08	2006-06-07	6.84	a	Yes	Goed	no	Geen	Grade 2	3	0	Grade 2	4	1	0	1:C2-C3	2.7	0	0	0	1	D	Best	P	No
Cavalier King Charles Spaniel	Male	Blenheim	2014-12-18	2013-06-19	1.5	c	Yes	Yes	No	No	Grade 2	3	0	Grade 1	3	0	0	TV: C2-C3	1	0	1	1	1.5	C	Best	M	No
Cavalier King Charles Spaniel	Female	Tricolour	2015-06-10	2013-08-16	1.82	c	Yes	Yes	No	No	Grade 2	2	0	Grade 0	1	0	0	2:C2	0	0	0	0	1	C	Best	M	No
Cavalier King Charles Spaniel	Male	Blenheim	2014-12-18	2013-08-18	1.33	c	Yes	Yes	No	No	Grade 2	2	0	Grade 1	3	0	0	2:C2-C3	1	0	1	2	1.5	C	Best	M	No
Cavalier King Charles Spaniel	Female	Tricolour	2015-03-16	2013-12-03	1.29	c	Yes	Yes	No	No	Grade 2	2	0	Grade 0	1	0	0	0	0	0	0	0	1	C	Best	M	No
Cavalier King Charles Spaniel	Female	Tricolour	2015-06-10	2013-12-03	1.52	c	Yes	Yes	No	No	Grade 2	3	0	Grade 0	1	0	0	2:C2-C4	0	0	1	2	1	C	Best	M	No
Cavalier King Charles Spaniel	Female	Blenheim	2015-03-16	2014-03-11	1.01	c	Yes	Yes	No	No	Grade 2	3	0	Grade 0	1	0	0	0	0	2	0	0	1	C	Best	M	No
Cavalier King Charles Spaniel	Female	Tricolor	2012-10-03	2009-10-30	2.93	c	yes	Good	No	No info provided	Grade 2	2	0	Grade 0	1	0	0	0	0	0	2	2	0	A	Best	D	No
Cavalier King Charles Spaniel	Female	Blenheim	2012-10-03	2010-03-07	2.57	c	yes	Good	No	No info provided	Grade 2	3	0	Grade 2	4	1	0	1:C3	2.47	0	1	0	0	D	Best	D	No
Cavalier King Charles Spaniel	Male	Tricolour	2012-05-15	2011-05-13	1.01	c	yes	Good	No	No info provided	Grade 2	2	0	Grade 0	1	0	0	0	0	0	0	0	0	C	Best	M	Yes	2
Cavalier King Charles Spaniel	Male	Tricolour	2013-11-15	2011-05-13	2.51	c	Yes	Good	no	No	Grade 2	3	0	Grade 1	3	1	0	2:C1-C4	1	0	0	3	1	A	Best	M	Yes	2
Cavalier King Charles Spaniel	Male	Blenheim	2014-12-18	2012-05-15	2.59	c	Yes	Yes	No	No	Grade 2	3	0	Grade 0	0	0	0	0	0	0	0	0	1	A	Best	M	No
Cavalier King Charles Spaniel	Male	Blenheim	2014-12-18	2012-11-11	2.1	c	Yes	Yes	No	No	Grade 2	3	0	Grade 1	3	0	0	2:C3-C5	1.2	0	0	0	1	C	Best	M	No
Cavalier King Charles Spaniel	Female	Tricolour	2014-12-29	2013-04-03	1.74	c	Yes	Yes	No	No	Grade 2	3	0	Grade 0	1	0	0	2:C3-C6	0	0	0	0	0	C	Best	M	No
Cavalier King Charles Spaniel	Female	Ruby	2013-12-27	2012-12-25	1.01	c	Yes	Good	No	No	Grade 2	3	0	Grade 0	1	0	0	2:C1-C3	0	0	0	0	0	C	Best	P	Yes	2
Cavalier King Charles Spaniel	Female	Ruby	2015-06-26	2012-12-25	2.5	c	Yes	Yes	No	No	Grade 2	3	0	Grade 0	2	0	0	2:C3-C5	0	0	0	0	1.5	A	Best	M	Yes	2
Cavalier King Charles Spaniel	Female	Blenheim	2013-01-17	2011-09-26	1.31	c	Yes	Yes	No	Onbekend	Grade 2	3	0	Grade 0	1	0	0	2:C2-C5	0	0	0	0	0	C	Best	P	Yes	2
Cavalier King Charles Spaniel	Female	Blenheim	2014-05-13	2011-09-26	2.63	c	Yes	Good	No	No	Grade 2	3	0	Grade 0	2	0	0	1:C1-C6	0	0	0	0	0	A	Best	M	Yes	2
Cavalier King Charles Spaniel			2011-07-07	2008-03-21	3.29	b	Unknown		Unknown	Unknown	Grade 2	3	0	Grade 0	0	0	0	0	0	0	0	3	1	A	Best		No
Cavalier King Charles Spaniel	female (*)		2011-04-18	2004-01-16	7.26	a	Unknown		Unknown	Unknown	Grade 2	3	0	Grade 2	4	1	3	1:C2-C3	2	0	3	1	1	D	Best		No
Cavalier King Charles Spaniel	male (*)	Black and tan (*)	2008-07-23	2005-09-18	2.85	c	Unknown		Unknown	Unknown	Grade 2	3	0	Grade 1	3	1	0	1:C3-C4	1.8	0	0	0	1	C	Meppel		No
Cavalier King Charles Spaniel	Female	Black and Tan	2011-12-22	2009-05-22	2.58	c	Yes	Good	No	No info provided	Grade 2	3	0	Grade 2	4	1	0	1:C2-C3	2.5	0	0	0	1	D	Best	Stefanie	No
Cavalier King Charles Spaniel	Female	Blenheim	2014-04-04	2012-03-15	2.05	c	Yes	Good	No	No	Grade 2	3	0	Grade 0	1	0	0	2:C2-C6	0	0	1	1	0	C	Best	M	Yes	2
Cavalier King Charles Spaniel	Female	Blenheim	2015-10-28	2012-03-15	3.62	b	Yes	Yes	No	Unknown	Grade 2	3	0	Grade 0	2	0	0	2:C1-C4	0	0	0	0	0	A	Best	M	Yes	2
Cavalier King Charles Spaniel	Male	Tricolour	2015-02-27	2014-02-25	1.01	c	Yes	Yes	No	No	Grade 2	2	0	Grade 0	1	0	0	0	0	0	0	0	0	C	Best	M	No
Cavalier King Charles Spaniel	male (*)	Tricolor (*)	2008-01-26	2007-03-15	0.86	c	Unknown		Unknown	Unknown	Grade 2	2	0	Grade 0	3	0	0	2:C1-C6	0	0	0	0	1	C	Meppel		No
Cavalier King Charles Spaniel	male (*)	Ruby (*)	2010-09-01	2009-06-26	1.18	c	Unknown		Unknown	Unknown	Grade 2	3	0	Grade 0	1	0	0	0	0	0	0	0	1	C	Best		No
Cavalier King Charles Spaniel	male (*)	Tricolor (*)	2010-08-03	2009-11-12	0.73	c			Unknown		Grade 2	3	0	Grade 0	1	0	0	2:C1-C4	0	0	0	0	1	C	Best	B	No
Cavalier King Charles Spaniel	Male	Blenheim	2013-05-10	2010-10-23	2.55	c	Yes	Goed	No	Geen	Grade 2	3	0	Grade 0	1	0	0	0	0	0	0	0	0	A	Best	P	No
Cavalier King Charles Spaniel	female (*)	Blenheim (*)	2009-04-10	2006-05-01	2.94	c	Unknown		Unknown	Unknown	Grade 2	2	0	Grade 0	2	0	0	2:C2-C5	0	0	0	3	0	A	Best		No
Cavalier King Charles Spaniel	Female	Blenheim	2011-10-21	2010-10-21	1	c	Yes	Good	no	No info provided	Grade 2	2	0	Grade 0	1	0	0	2:C2-C4	0	0	0	0	1	C	Best		No
Cavalier King Charles Spaniel	Male	Tricolor	2012-10-30	2009-02-17	3.7	b	yes	Good	No	No info provided	Grade 2	2	0	Grade 0	1	0	0	0	0	0	0	0	1	A	Best	M	No
Cavalier King Charles Spaniel	Male	Blenheim	2010-12-29	2009-10-23	1.18	c	Unknown		No	Unknown	Grade 2	3	0	Grade 0	1	0	0	2:C2-C6	0	0	0	0	1	C	Best		Yes	2
Cavalier King Charles Spaniel	Male	Blenheim	2012-09-11	2009-10-23	2.88	c	yes	Good	No	No info provided	Grade 1	1	0	Grade 0	2	0	0	2:C2-C6	0	0	0	0	0	A	Best	M	Yes	2
Cavalier King Charles Spaniel	Female	Blenheim	2012-07-18	2009-04-04	3.29	b	yes	Good	No	No info provided	Grade 2	2	0	Grade 0	1	0	0	0	0	0	0	1	0	A	Best	L	No
Cavalier King Charles Spaniel	Female	Black and Tan	2015-06-09	2014-04-11	1.16	c	Yes	Yes	No	No	Grade 2	3	1	Grade 0	1	0	0	2:C2-C3	0	0	0	0	1	C	Best	M	No
Cavalier King Charles Spaniel	Female	Tricolour	2013-04-23	2011-12-01	1.39	c			Unknown		Grade 2	3	0	Grade 0	1	0	0	0	0	0	0	0	1	C	Best		No
Cavalier King Charles Spaniel	male (*)	Tricolor (*)	2009-09-22	2006-03-17	3.51	b	Unknown		Unknown	Unknown	Grade 2	4	0	Grade 1	3	1	0	1:C2-C3	1.2	0	3	3	0	A	Best		No
Cavalier King Charles Spaniel	female (*)	Tricolor (*)	2007-06-30	2006-08-13	0.88	c	Unknown		Unknown	Unknown	Grade 2	3	0	Grade 0	1	0	0	0	0	0	0	0	0	C	Meppel		No
Cavalier King Charles Spaniel	Female	Black and Tan	2015-06-19	2014-02-28	1.3	c	Yes	Yes	No	No	Grade 2	3	0	Grade 1	2	0	0	2:C2-C3	0.6	0	0	0	0	C	Best	M	No
Cavalier King Charles Spaniel	Female	Tricolour	2014-08-27	2011-10-13	2.87	c	Yes	Good	No	No	Grade 2	2	0	Grade 0	2	0	0	2:C2-C6	0	0	0	2	1	A	Drachten	P	No
Cavalier King Charles Spaniel	Male	Ruby	2012-08-07	2009-10-27	2.78	c	yes	Good	No	No info provided	Grade 2	2	0	Grade 1	3	0	0	0	0.5	0	1	1	0	A	Best	M	No
Cavalier King Charles Spaniel	Female	Blenheim	2015-06-30	2013-10-22	1.69	c	Yes	Yes	No	No	Grade 2	2	0	Grade 0	2	0	0	2:C2-C4	0	0	2	0	1.5	C	Best	M	No
Cavalier King Charles Spaniel	Female	Ruby	2013-02-14	2011-07-16	1.58	c	Yes	Yes	No	Onbekend	Grade 2	3	0	Grade 0	1	0	0	2:C2-C4	0	0	0	2	0	C	Best	P	Yes	2
Cavalier King Charles Spaniel	Female	Ruby	2014-07-24	2011-07-16	3.02	b	Yes	Good	No	No	Grade 2	2	0	Grade 0	1	0	0	2:C3-C4	0	0	3	3	1	A	Best	M	Yes	2
Cavalier King Charles Spaniel	female (*)	Tricolor (*)	2011-06-09	2008-11-21	2.55	c	Unknown		Unknown	Unknown	Grade 2	3	0	Grade 0	1	0	0	2:C2-C5	0	0	0	0	1	A	Best		No
Cavalier King Charles Spaniel	Female	Blenheim	2012-09-11	2009-10-22	2.89	c	yes	Good	No	No info provided	Grade 2	3	0	Grade 1	3	0	0	2:C2-C4	1	0	0	0	0	A	Best	M	No
Cavalier King Charles Spaniel	teef	Ruby	2012-01-27	2009-06-19	2.61	c	ja	Goed	No	Geen hartruis (1ste lijns dierenarts)	Grade 2	3	0	Grade 0	1	0	0	0	0	0	0	0	1	A	Drachten	L	No
Cavalier King Charles Spaniel	female (*)	Blenheim (*)	2010-09-03	2007-12-09	2.73	c	Unknown		Unknown	Unknown	Grade 2	2	0	Grade 1	3	1	3	1:C2-C3	2.3	0	0	0	1	D	Best		No
Cavalier King Charles Spaniel			2009-07-09	2005-04-27	4.2	b	Unknown		Unknown	Unknown	Grade 2	3	0	Grade 1	3	1	0	1:C2-C3	1.8	0	0	1	0	A	Best		No
Cavalier King Charles Spaniel	Male	Blenheim	2014-10-21	2013-06-11	1.36	c	Yes	Good	No	No	Grade 2	3	1	Grade 0	2	0	0	2:C2-C3	0	0	0	0	1	C	Best	M	No
Cavalier King Charles Spaniel	female (*)	Ruby (*)	2008-07-03	2007-03-22	1.28	c	Unknown		Unknown	Unknown	Grade 2	3	0	Grade 2	5	1	0	1:C2-C4	3.3	0	0	0	1	E	Best		No
Cavalier King Charles Spaniel	Female	Blenheim	2012-09-11	2009-10-23	2.88	c	yes	Good	No	No info provided	Grade 1	1	0	Grade 0	1	0	0	0	0	0	0	0	0	A	Best	M	No
Cavalier King Charles Spaniel	Female	Black and Tan	2012-02-03	2010-10-11	1.31	c	ja	Goed	No	Geen informatie vermeld	Grade 2	2	0	Grade 0	2	0	0	2:C2-C5	0	1	0	0	1.5	C	Best	N	Yes	2
Cavalier King Charles Spaniel	Female	Black and Tan	2013-04-12	2010-10-11	2.5	c	Yes	Goed	no	Geen	Grade 2	3	0	Grade 0	1	0	0	0	0	2	0	0	0	A	Best	P	Yes	2
Cavalier King Charles Spaniel	Female	Tricolour	2013-03-07	2012-03-06	1	c	Yes	Yes	No	Onbekend	Grade 2	2	0	Grade 0	1	0	0	2:C2-C4	0	0	0	0	1	C	Best	M	Yes	2
Cavalier King Charles Spaniel	Female	Tricolour	2014-09-17	2012-03-06	2.53	c	Yes	Good	No	No	Grade 2	2	0	Grade 0	1	0	0	2:C2-C3	0	0	0	0	0	A	Best	P	Yes	2
Cavalier King Charles Spaniel	Female	Ruby	2013-11-27	2010-09-08	3.22	b	Yes	Good	No	No	Grade 2	3	0	Grade 2	5	1	3	1:C2-C4	3.6	0	0	3	0	D	Orion	L	No
Cavalier King Charles Spaniel	Female	Tricolour	2013-03-05	2010-05-22	2.79	c	Yes	Yes	No	Onbekend	Grade 2	3	0	Grade 0	1	0	0	2:C2-C4	0	0	0	3	0	A	Best	M	No
Cavalier King Charles Spaniel	Female	Black and Tan	2012-11-19	2010-05-18	2.5	c	Yes	Yes	No	Onbekend	Grade 2	2	0	Grade 1	3	1	0	1:C2	1	0	2	2	1	A	Best	P	No
Cavalier King Charles Spaniel			2009-09-25	2004-04-18	5.44	a	Unknown		Unknown	Unknown	Grade 2	3	0	Grade 0	1	0	0	2:C2-C6	0	0	0	0	0	A	Best		No
Cavalier King Charles Spaniel	female (*)	Tricolor (*)	2011-08-31	2009-02-22	2.53	c	Unknown		Unknown	Unknown	Grade 2	2	0	Grade 2	4	1	0	1:C2-C4	2.2	0	0	0	0	D	Best		No
Cavalier King Charles Spaniel	Female	Ruby	2013-03-05	2010-03-09	2.99	b	Yes	Yes	No	Onbekend	Grade 2	2	0	Grade 1	3	1	0	1:C1-C2	1.9	0	0	0	0	A	Best	M	No
Cavalier King Charles Spaniel	Female	Tricolour	2013-07-10	2011-03-07	2.34	c	Yes	Yes	No	Geen	Grade 2	2	0	Grade 1	3	1	0	1:C2	1.5	0	0	0	1	C	Best	HAJ	Yes	2
Cavalier King Charles Spaniel	Female	Tricolour	2014-09-26	2011-03-07	3.55	b	Yes	Good	No	No	Grade 2	2	0	Grade 2	4	1	3	1:C2-C4	2.8	0	0	0	1	D	Best	M	Yes	2
Cavalier King Charles Spaniel	Female	Black and Tan	2013-08-22	2010-03-09	3.45	b	Yes	Good	No	No	Grade 2	3	1	Grade 0	1	0	0		0	0	1	2	0	A	Best	M	No
Cavalier King Charles Spaniel	Female	Black and Tan	2015-02-11	2013-05-06	1.76	c	Yes	Yes	No	No	Grade 2	3	0	Grade 0	1	0	0	2:C2-C3	0	0	0	0	1	C	Best	M	No
Cavalier King Charles Spaniel			2011-08-23	2005-10-17	5.85	a	Unknown		Unknown	Unknown	Grade 2	3	0	Grade 2	5	1	3	1:C2-C5	3.4	0	0	2	1	D	Best		No
Cavalier King Charles Spaniel	Female	Blenheim	2013-10-15	2012-10-15	1	c	Yes	Good	no	No	Grade 2	2	1	Grade 0	1	0	0	2:C2	0	0	0	0	1	C	Best	M	Yes	2
Cavalier King Charles Spaniel	Female	Blenheim	2015-05-05	2012-10-15	2.56	c	Yes	Yes	No	No	Grade 2	3	0	Grade 1	3	1	3	1:C3	1.8	0	0	0	0	A	Best	M	Yes	2
Cavalier King Charles Spaniel	Female	Black and Tan	2015-04-20	2010-11-26	4.4	b	Yes	Yes	No	No	Grade 2	3	0	Grade 2	5	1	0	1:C2-C4	3.4	0	0	2	1	D	Best	M	No
Cavalier King Charles Spaniel	Female	Blenheim	2013-06-20	2011-12-04	1.54	c	Yes	Goed	Present	Geen	Grade 2	3	5	Grade 2	6	1	0	1:C1-C5	6.7	1	2	3	0	F	Best	M	No
Cavalier King Charles Spaniel			2011-04-28	2006-07-27	4.75	b	Unknown		Unknown	Unknown	Grade 2	3	0	Grade 1	3	1	0	1:C3	1.8	0	0	0	1	A	Best		No
Cavalier King Charles Spaniel	Female	Blenheim	2013-11-06	2010-12-28	2.86	c	Yes	Good	no	No	Grade 2	3	0	Grade 1	1	1	0	2:C1-C6	0	0	0	0	1	A	Orion	M	No
Cavalier King Charles Spaniel	Male	Ruby	2015-11-11	2010-10-12	5.08	a	Yes	Yes	No	Unknown	Grade 2	3	0	Grade 0	1	0	0	2:C2-C4	0	0	3	0	0	A	Best	M	No
Cavalier King Charles Spaniel			2009-01-26	2004-05-22	4.68	b	Unknown		Unknown	Unknown	Grade 2	3	0	Grade 1	2	0	0	2:C2-C5	0.5	0	0	0	0	A	Best		No
Cavalier King Charles Spaniel	female (*)	Black and tan (*)	2009-04-10	2006-07-30	2.69	c	Unknown		Unknown	Unknown	Grade 2	3	0	Grade 0	1	0	0	2:C2-C3	0	0	0	0	0	A	Best		No
Cavalier King Charles Spaniel	Female	Blenheim	2011-01-24	2007-02-04	3.97	b	Yes	Yes	No	Onbekend	Grade 2	2	0	Grade 0	2	0	0	0	0	0	0	0	0	A	Best	P	No
Cavalier King Charles Spaniel	Female	Blenheim	2013-06-17	2010-06-15	3.01	b	Yes	Goed	No	Geen	Grade 2	3	0	Grade 0	1	0	0	2:C2-C5	0	0	0	0	1	A	Best	L	No
Cavalier King Charles Spaniel	Female	Blenheim	2011-01-24	2007-02-04	3.97	b	Yes	Yes	No	Onbekend	Grade 2	3	0	Grade 0	2	0	0	2:C2-C4	0	0	0	0	1.5	A	Best	P	No
Cavalier King Charles Spaniel	Female	Blenheim	2013-08-22	2012-08-18	1.01	c	Yes	No not correctly aligned	No	No	Grade 2	2	0	Grade 1	3	1	0	1:C3	1.3	0	1	0	1	C	Best	M	No
Cavalier King Charles Spaniel	Female	Ruby	2012-11-19	2011-01-05	1.87	c	Yes	Yes	No	Onbekend	Grade 2	3	0	Grade 1	3	0	0	2:C2-C3	0.5	0	0	0	0	A	Best	P	Yes	2
Cavalier King Charles Spaniel	Female	Ruby	2014-05-30	2011-01-05	3.4	b	Yes	Good	No	No	Grade 2	3	0	Grade 1	3	0	0	2:C2-C3	1	0	0	0	0	A	Best	M	Yes	2
Cavalier King Charles Spaniel	reu	Tricolour	2012-01-30	2004-01-04	8.07	a	ja	Goed	No	Geen info vermeld	Grade 2	3	0	Grade 0	2	0	0	2:C2-C6	0	0	2	2	1	A	Best	L	No
Cavalier King Charles Spaniel	Female	Ruby	2011-12-13	2009-02-21	2.81	c	Yes	Good	no	No info provided	Grade 2	3	0	Grade 1	3	1	0	1:C3	1.1	0	0	0	1	A	Best	Stefanie	No
Cavalier King Charles Spaniel	female (*)	Blenheim (*)	2008-06-26	2005-10-02	2.73	c	Unknown		Unknown	Unknown	Grade 2	2	0	Grade 0	1	0	0	2:C2-C4	0	0	0	0	1	A	Best		No
Cavalier King Charles Spaniel	Female	Blenheim	2012-09-12	2010-02-26	2.54	c	yes	Good	No	No info provided	Grade 2	2	0	Grade 0	1	0	0	0	0	0	0	0	0	A	Best	M	No
Cavalier King Charles Spaniel	Female	Blenheim	2011-10-13	2007-12-03	3.86	b	Yes	Good	no	No info provided	Grade 2	3	0	Grade 1	3	0	0	2:C2-C4	0.5	0	0	2	1	A	Best		No
Cavalier King Charles Spaniel	Female	Blenheim	2011-12-27	2009-05-30	2.58	c	Yes	yes	No	No info provided	Grade 2	2	0	Grade 1	3	0	0	2:C2-C4	0.5	0	0	0	1	A	Best	Stefanie	No
Cavalier King Charles Spaniel	female (*)	Blenheim (*)	2011-06-28	2006-11-19	4.61	b	Unknown		Unknown	Unknown	Grade 2	4	0	Grade 2	4	1	0	1:C2-C4	2.3	0	0	0	1	D	Best		No
Cavalier King Charles Spaniel	male (*)		2008-01-26	2004-10-30	3.24	b	Unknown		Unknown	Unknown	Grade 2	3	1	Grade 2	4	1	0	1:C3	2.5	0	0	0	0	D	Meppel		No
Cavalier King Charles Spaniel	Male	Tricolor	2012-07-16	2005-06-17	7.08	a	Yes	Yes	Unknown	Onbekend	Grade 2	3	0	Grade 0	2	0	0	2:C2-C6	0	0	2	2	0	A	Utrecht	M	Yes	2
Cavalier King Charles Spaniel	Male	Tricolor	2008-01-26	2005-06-17	2.61	c	Unknown		Unknown	Unknown	Grade 2	3	0	Grade 0	0	0	0	0	0	0	0	0	0	A	Meppel		Yes	2
Cavalier King Charles Spaniel	female (*)	Ruby (*)	2011-08-22	2006-12-12	4.69	b	Unknown		Unknown	Unknown	Grade 2	3	0	Grade 0	1	0	0	0	0	0	0	0	1	A	Best		No
Cavalier King Charles Spaniel	Female	Black and Tan	2013-01-09	2007-07-24	5.46	a	Yes	Yes	No	Onbekend	Grade 2	3	0	Grade 0	1	0	0	2:C2-C5	0	0	0	0	0	A	Best	P	No
Cavalier King Charles Spaniel	male (*)		2007-09-03	2002-09-06	4.99	a	Unknown		Unknown	Unknown	Grade 2	3	0	Grade 0	1	0	0	0	0	0	0	0	0	A	Best		No
Cavalier King Charles Spaniel			2007-09-03	2002-10-06	4.91	b	Unknown		Unknown	Unknown	Grade 2	3	0	Grade 0	1	0	0	0	0	0	0	0	0	A	Best		No
Cavalier King Charles Spaniel	female (*)	Blenheim (*)	2010-04-14	2008-11-18	1.41	c	Unknown		Unknown	Unknown	Grade 2	3	0	Grade 2	4	1	0	1:C2-C4	2.5	0	0	0	1	E	Best		No
Cavalier King Charles Spaniel	Female	Blenheim	2015-03-18	2013-10-13	1.43	c	Yes	Yes	No	No	Grade 2	2	0	Grade 0	1	0	0	2:C3	0	0	0	0	0	C	Best	M	No
Cavalier King Charles Spaniel	Male	Blenheim	2015-03-18	2013-10-13	1.43	c	Yes	Yes	No	No	Grade 2	3	0	Grade 0	1	0	0	2:C2-C3	0	0	0	0	1	C	Best	M	No
Cavalier King Charles Spaniel	Female	Blenheim	2011-12-16	2008-07-06	3.44	b	Yes	Good	No	No info provided	Grade 2	2	0	Grade 0	1	0	0	2:C2-C6	0	0	0	0	1	A	Best	Stefanie	No
Cavalier King Charles Spaniel	Female	Blenheim	2014-04-15	2013-04-12	1.01	c	Yes	Good	No	No	Grade 2	2	0	Grade 0	1	0	0	0	0	0	0	0	0	C	Best	M	No
Cavalier King Charles Spaniel	Male	Blenheim	2015-07-21	2014-05-25	1.16	c	Yes	Yes	No	No	Grade 2	3	2	Grade 0	0	0	0	0	0	0	0	0	0	C	Best	M	No
Cavalier King Charles Spaniel	Female	Blenheim	2014-07-25	2010-11-22	3.68	b	Yes	Good	No	No	Grade 2	2	0	Grade 1	3	0	0	2:C3-C4	1	0	2	2	1	A	Best	M	No
Cavalier King Charles Spaniel	Female	Ruby	2014-10-17	2011-05-10	3.44	b	Yes	Good	No	No	Grade 2	3	0	Grade 2	5	1	0	1:C2-C4-C6	3.5	0	0	2	0	D	Best	M	No
Cavalier King Charles Spaniel	Female	Blenheim	2014-10-27	2012-02-11	2.71	c	Yes	Yes	No	No	Grade 2	3	2	Grade 2	5	1	0	1:C1-C7	4	0	0	0	1	D	Orion	M	No
Cavalier King Charles Spaniel	Female	Blenheim	2013-05-06	2011-06-09	1.91	c	Yes	Goed	No	Geen	Grade 2	3	0	Grade 0	1	0	0	0	0	0	0	0	0	C	Best	P	No
Cavalier King Charles Spaniel	Female	Black and Tan	2015-03-13	2011-08-07	3.6	b	Yes	Yes	No	No	Grade 2	2	0	Grade 2	4	1	3	1:C2-C3	2.7	0	0	0	1	D	Best	M	No
Cavalier King Charles Spaniel	female (*)	Blenheim (*)	2009-04-10	2005-12-30	3.28	b	Unknown		Unknown	Unknown	Grade 2	3	0	Grade 2	6	1	0	1:C2-C4	4.8	0	0	0	0	D	Best		No
Cavalier King Charles Spaniel	female (*)	Black and tan (*)	2010-09-03	2009-01-31	1.59	c	Unknown		Unknown	Unknown	Grade 2	4	0	Grade 2	6	1	0	1:C2-C6	4.3	0	0	0	1	E	Best		Yes	2
Cavalier King Charles Spaniel	female (*)	Black and tan (*)	2011-10-21	2009-01-31	2.73	c	Unknown		Unknown	Unknown	Grade 2	4	0	Grade 2	6	1	0	1:C2-C6	4.3	0	0	0	1	E	Best		Yes	2
Cavalier King Charles Spaniel	teef	Blenheim	2012-02-02	2009-07-11	2.56	c	Ja	Matig	No	Geen hartruis (1ste lijns dierenarts)	Grade 2	3	0	Grade 0	2	0	0	2:C2-C4	0	0	0	0	0	A	Dordrecht	N	No
Cavalier King Charles Spaniel	female (*)	Black and tan (*)	2011-07-08	2007-12-30	3.52	b	Unknown		Unknown	Unknown	Grade 2	3	0	Grade 0	1	0	0	0	0	0	0	0	1	A	Best		No
Cavalier King Charles Spaniel	female (*)	Black and tan (*)	2010-01-25	2004-02-11	5.96	a	Unknown		Unknown	Unknown	Grade 2	3	0	Grade 0	1	0	0	2:C2-C4	0	0	0	0	1	A	Best		No
Cavalier King Charles Spaniel	Female	Tricolor	2012-10-01	2009-06-20	3.28	b	yes	Good	No	No info provided	Grade 2	3	0	Grade 0	2	0	0	2:C2-C6	0	0	0	2	0	A	Best	D	No
Cavalier King Charles Spaniel	Female	Black and Tan	2015-06-29	2011-10-04	3.74	b	Yes	Yes	No	No	Grade 2	3	0	Grade 2	6	1	3	2:C2-C5	4.4	0	0	3	0	D	Orion	M	No
Cavalier King Charles Spaniel	Female	Blenheim	2015-02-23	2011-07-08	3.63	b	Yes	Yes	No	No	Grade 2	3	0	Grade 1	3	1	0	1:C3	1.6	0	0	3	1	A	Orion	M	No
Cavalier King Charles Spaniel	Female	Tricolour	2010-06-16	2009-12-01	0.54	c	Unknown		no	Unknown	Grade 2	2	0	Grade 0	1	0	0	2:C2-C3	0	3	2	0	1	C	Best		Yes	2
Cavalier King Charles Spaniel	Female	Tricolour	2012-08-09	2009-12-01	2.69	c	yes	Good	No	No info provided	Grade 1	1	0	Grade 0	1	0	0	0	0	0	0	0	0	A	Best	M	Yes	2
Cavalier King Charles Spaniel	Female	Black and Tan	2015-01-08	2011-09-12	3.32	b	Yes	Yes	No	No	Grade 2	3	0	Grade 2	4	1	3	1:C2-C3	3	0	0	0	1.5	D	Best	M	No
Cavalier King Charles Spaniel	male (*)		2010-12-27	2008-06-18	2.53	c	Unknown		Unknown	Unknown	Grade 2	3	0	Grade 0	1	0	0	2:C2-C4	0	0	0	0	1.5	A	Best		No
Cavalier King Charles Spaniel	male (*)		2009-04-08	2008-06-18	0.81	c	Unknown		Unknown	Unknown	Grade 2	3	0	Grade 0	1	0	0	2:C2-C4	0	0	0	0	1	C	Best		No
Cavalier King Charles Spaniel	female (*)	Blenheim (*)	2008-03-25	2004-12-20	3.26	b	Unknown		Unknown	Unknown	Grade 2	3	0	Grade 1	3	1	0	1:C3	1.7	0	3	2	1	A	Best		No
Cavalier King Charles Spaniel	Female	Tricolour	2012-01-27	2009-07-26	2.5	c	ja	Goed	Unknown	Geen informatie vermeld	Grade 2	2	0	Grade 1	2	0	0	2:C2-C5	0.5	0	0	2	0	D	Best	N	No
Cavalier King Charles Spaniel	Male	Blenheim	2012-02-14	2010-11-20	1.23	c	ja	Goed	No	Geen informatie vermeld	Grade 2	3	0	Grade 0	2	0	0	2:C2-C6	0	0	0	0	1	C	Best	N	Yes	2
Cavalier King Charles Spaniel	Male	Blenheim	2013-06-20	2010-11-20	2.58	c	Yes	Not aligned	No	Geen	Grade 2	3	1	Grade 0	1	0	0	0	0	0	2	3	0	A	Best	M	Yes	2
Cavalier King Charles Spaniel	Female	Blenheim	2014-02-12	2013-01-21	1.06	c	Yes	Good	No	No	Grade 2	2	0	Grade 0	0	0	0	0	0	0	0	0	0	C	Best	M	Yes	2
Cavalier King Charles Spaniel	Female	Blenheim	2015-08-19	2013-01-21	2.58	c	Yes	Yes	No	Unknown	Grade 2	3	0	Grade 0	1	0	0	2:C3	0	0	1	0	1	A	Best	M	Yes	2
Cavalier King Charles Spaniel	Female	Blenheim	2012-04-27	2011-04-27	1	c	yes	Good	No	No info provided	Grade 2	2	0	Grade 0	1	0	0	0	0	0	0	0	1	C	Best	P	Yes	2
Cavalier King Charles Spaniel	Female	Blenheim	2013-10-28	2011-04-27	2.5	c	Yes	Good	no	No	Grade 2	2	0	Grade 0	1	0	0	2:C1-C6	0	0	0	3	0	A	Best	M	Yes	2
Cavalier King Charles Spaniel	Female	Blenheim	2015-04-01	2014-03-21	1.03	c	Yes	Yes	No	No	Grade 2	4	0	Grade 0	0	0	0	0	0	0	2	2	0	C	Best	M	No
Cavalier King Charles Spaniel	Male	Ruby	2015-04-20	2011-12-10	3.36	b	Yes	Yes	No	No	Grade 2	2	0	Grade 1	2	1	0	1:C2-C3	0.6	0	0	0	0	A	Best	M	No
Cavalier King Charles Spaniel	Male	Ruby	2014-03-03	2011-05-10	2.81	c	Yes	Good	No	No	Grade 2	3	1	Grade 2	5	1	0.1	1:C3-C5	3.4	0	1	2	0	D	Best	M	No
Cavalier King Charles Spaniel	female (*)	Tricolor (*)	2007-03-10	2006-01-11	1.16	c	Unknown		Unknown	Unknown	Grade 2	3	0	Grade 2	1	0	0	0	0	0	0	0	1	C	Meppel		No
Cavalier King Charles Spaniel	Male	Blenheim	2012-12-24	2011-11-25	1.08	c	Yes	Yes	No	Onbekend	Grade 2	2	0	Grade 0	1	0	0	0	0	0	0	0	0	C	Best	M	No
Cavalier King Charles Spaniel	Female	Black and Tan	2010-08-19	2008-03-13	2.43	c	Yes	Not good	no	No info provided	Grade 1	1	0	Grade 0	0	0	0	0	0	0	0	0	1	A	Utrecht		No
Cavalier King Charles Spaniel	Female	Ruby	2015-08-20	2011-02-26	4.48	b	Yes	Yes	No	Unknown	Grade 2	3	0	Grade 0	2	0	0	2:C3-C4	0	0	0	2	1.5	A	Orion	M	No
Cavalier King Charles Spaniel	Female	Blenheim	2012-03-29	2009-07-08	2.73	c	yes	Good	No	No info provided	Grade 2	3	0	Grade 2	5	1	3	1:C2-C4	3.1	0	2	0	0	D	Best	N	No
Cavalier King Charles Spaniel	female (*)	Blenheim (*)	2010-07-16	2010-01-01	0.54	c	Unknown		Unknown	Unknown	Grade 2	3	0	Grade 2	5	1	0	1:C3-C5	3.1	0	0	3	1	E	Best		No
Cavalier King Charles Spaniel	Male	Ruby	2014-03-03	2011-08-16	2.55	c	Yes	Good	No	No	Grade 2	3	0	Grade 2	4	1	0	1:C3-C4	2.4	0	2	0	0	D	Best	M	No
Cavalier King Charles Spaniel	Female	Ruby	2015-06-29	2011-01-09	4.47	b	Yes	Yes	No	No	Grade 2	3	0	Grade 2	3	1	3	2:C2-C4	2.4	0	2	0	0	D	Orion	M	No
Cavalier King Charles Spaniel			2007-11-14	2005-07-01	2.37	c	Unknown		Unknown	Unknown	Grade 2	3	0	Grade 2	4	1	0	1:C3-C4	2.7	0	2	0	0	E	Best		No
Cavalier King Charles Spaniel	female (*)	Blenheim (*)	2008-08-08	1999-01-09	9.58	a	Unknown		Unknown	Unknown	Grade 2	3	0	Grade 2	5	1	0	1:C2-C4	3.6	0	2	2	1	D	Best		No
Cavalier King Charles Spaniel	Female	Blenheim	2012-10-23	2010-03-06	2.63	c	yes	Good	No	No info provided	Grade 2	3	0	Grade 1	3	1	0	1:C3	1.6	0	0	0	1.5	A	Best	M	No
Cavalier King Charles Spaniel	female (*)	Tricolor (*)	2012-09-14	2010-05-05	2.36	c			Unknown		Grade 2	3	0	Grade 2	4	1	0	1:C3	2.3	0	2	0	1	E	Best		No
Cavalier King Charles Spaniel	Female	Blenheim	2015-09-14	2012-09-13	3	b	Yes	Yes	No	Unknown	Grade 2	3	2	Grade 0	2	0	0	2:C2-C6	0	0	0	0	0	A	Best	M	No
Cavalier King Charles Spaniel	teef	Tricolour	2012-01-30	2009-06-02	2.66	c	ja	Goed	No	Geen info vermeld	Grade 2	2	0	Grade 2	6	1	0	1:C2-C3	6	0	0	0	1	D	Best	L	No
Cavalier King Charles Spaniel	Male	Tricolour	2014-11-05	2012-04-25	2.53	c	Yes	Good	No	No	Grade 2	3	0	Grade 0	1	0	0	0	0	0	0	0	1	A	Best	M	No
Cavalier King Charles Spaniel	Female	Blenheim	2015-10-21	2013-04-20	2.5	c	Yes	Yes	No	Unknown	Grade 2	3	0	Grade 0	2	0	0	2:C2-C6	0	0	0	0	0	A	Best	M	No
Cavalier King Charles Spaniel	female (*)	Tricolor (*)	2007-06-30	2003-09-09	3.81	b	Unknown		Unknown	Unknown	Grade 2	3	0	Grade 2	5	1	0	1:C2-C3	3.8	3	1	0	0	D	Meppel		No
Cavalier King Charles Spaniel	male (*)	Blenheim (*)	2010-09-22	2007-03-15	3.52	b	Unknown		Unknown	Unknown	Grade 2	3	0	Grade 0	0	0	0	0	0	0	0	0	1	A	Best		No
Cavalier King Charles Spaniel	female (*)		2010-04-14	2007-06-23	2.81	c	Unknown		Unknown	Unknown	Grade 2	3	0	Grade 1	3	1	0	1:C3	1.5	0	0	0	1	A	Best		No
Cavalier King Charles Spaniel	female (*)	Tricolor (*)	2009-05-26	2007-06-23	1.93	c	Unknown		Unknown	Unknown	Grade 2	3	0	Grade 1	3	1	0	1:C2-C3	1.2	0	0	3	1	C	Best		No
Cavalier King Charles Spaniel	female (*)	Tricolor (*)	2010-10-27	2007-06-23	3.34	b	Unknown		Unknown	Unknown	Grade 2	3	0	Grade 0	0	0	0	0	0	0	2	0	1.5	A	Best		No
Cavalier King Charles Spaniel	female (*)		2008-07-17	2007-10-14	0.76	c	Unknown		Unknown	Unknown	Grade 2	2	0	Grade 0	0	0	0	0	0	0	0	0	0	C	Best		Yes	2
Cavalier King Charles Spaniel	female (*)		2010-04-27	2007-10-14	2.54	c	Unknown		Unknown	Unknown	Grade 2	2	0	Grade 0	0	0	0	0	0	0	0	0	0	A	Best		Yes	2
Cavalier King Charles Spaniel	female (*)	Blenheim (*)	2010-12-01	2008-04-06	2.65	c	Unknown		Unknown	Unknown	Grade 2	2	1	Grade 0	1	0	0	2:C3	0	0	0	3	1	A	Best		No
Cavalier King Charles Spaniel	male (*)	Blenheim (*)	2009-07-02	2008-06-15	1.05	c	Unknown		Unknown	Unknown	Grade 2	2	0	Grade 0	0	0	0	0	0	2	0	0	1	C	Best		Yes	2
Cavalier King Charles Spaniel	male (*)	Blenheim (*)	2010-12-15	2008-06-15	2.5	c	Unknown		Unknown	Unknown	Grade 2	2	0	Grade 0	0	0	0	0	0	2	0	0	1	A	Best		Yes	2
Cavalier King Charles Spaniel	female (*)	Tricolor (*)	2010-04-14	2008-09-10	1.59	c	Unknown		Unknown	Unknown	Grade 2	3	0	Grade 0	0	0	0	0	0	0	0	0	1.5	C	Best		Yes	2
Cavalier King Charles Spaniel	female (*)	Tricolor (*)	2011-03-23	2008-09-10	2.54	c	Unknown		Unknown	Unknown	Grade 2	3	0	Grade 0	1	0	0	0	0	0	0	0	1.5	A	Best		Yes	2
Cavalier King Charles Spaniel	female (*)		2008-06-26	2005-04-26	3.17	b	Unknown		Unknown	Unknown	Grade 2	2	0	Grade 0	2	0	0	2:C2-C6	0	0	0	0	1	A	Best		No
Cavalier King Charles Spaniel	female (*)	Tricolor (*)	2008-03-28	2006-05-04	1.9	c	Unknown		Unknown	Unknown	Grade 2	3	0	Grade 1	1	0	0	1:C2	0.5	0	0	0	1	C	Best		No
Cavalier King Charles Spaniel	Female	Blenheim	2012-04-10	2010-07-19	1.73	c	yes	Good	No	No info provided	Grade 2	2	0	Grade 0	1	0	0	0	0	0	0	0	0	C	Best	N	Yes	2
Cavalier King Charles Spaniel	Female	Blenheim	2013-02-19	2010-07-19	2.58	c	Yes	Yes	No	Onbekend	Grade 2	2	0	Grade 0	1	0	0	2:C2-C4	0	0	0	3	1	A	Best	P	Yes	2
Cavalier King Charles Spaniel	Female	Tricolour	2013-07-03	2012-01-13	1.47	c	Yes	A chip artefact is visible but did not affect the evaluation.	No	Geen	Grade 2	4	0	Grade 0	1	0	0	0	0	0	1	1	0	C	Best	M	Yes	2
Cavalier King Charles Spaniel	Female	Tricolour	2014-09-25	2012-01-13	2.7	c	Yes	Good	No	No	Grade 2	2	0	Grade 1	2	1	0	1:C2-C3	0.9	0	0	0	1	A	Best	P	Yes	2
Cavalier King Charles Spaniel	Male	Tricolour	2010-08-27	2009-07-18	1.11	c	Unknown		no	Unknown	Grade 2	3	0	Grade 0	1	0	0	0	0	0	0	0	0	C	Best		Yes	2
Cavalier King Charles Spaniel	Male	Tricolour	2012-01-30	2009-07-18	2.53	c	ja	Goed	No	Geen info vermeld	Grade 2	3	0	Grade 0	2	0	0	2:C2-C6	0	0	0	2	0	A	Best	L	Yes	2
Cavalier King Charles Spaniel	female (*)	Tricolor (*)	2011-11-29	2009-08-06	2.31	c			Unknown		Grade 2	3	0	Grade 0	1	0	0	0	0	0	0	0	1.5	C	Best		No
Cavalier King Charles Spaniel	Female	Blenheim	2012-04-24	2009-08-25	2.66	c	yes	Good	No	No info provided	Grade 2	2	0	Grade 0	1	0	0	0	0	0	0	0	1	A	Best	P	No
Cavalier King Charles Spaniel	Female	Tricolour	2013-10-09	2012-04-26	1.45	c	Yes	Good	no	No	Grade 2	3	0	Grade 2	5	2	2	1:C2-C5	3.6	0	0	0	0	E	Orion	M	Yes	2
Cavalier King Charles Spaniel	Female	Tricolour	2015-03-14	2012-04-26	2.88	c	Yes	Yes	No	No	Grade 2	2	0	Grade 2	4	1	0	2:C2-C4	2.2	0	0	0	1.5	D	Best	M	Yes	2
Cavalier King Charles Spaniel	Female	Tricolour	2015-03-25	2013-03-06	2.05	c	Yes	Yes	No	No	Grade 2	2	0	Grade 0	1	0	0	2:C1-C3	0	0	0	1	0	C	Best	M	No
Cavalier King Charles Spaniel	Teef	Blenheim	2012-02-14	2008-02-21	3.98	b	ja	Goed	Unknown	Geen informatie vermeld	Grade 2	3	0	Grade 1	3	0	1	2:C2-C5	0.5	0	0	0	1.5	A	Best	N	No
Cavalier King Charles Spaniel	reu	Blenheim	2012-01-12	2003-04-08	8.76	a	ja	ja	No	Echo: klasse C / Auscultatie: systolisch geruis 3/6	Grade 2	3	0	Grade 2	4	1	0	1:C3	2.7	0	0	0	1	D	Best		No
Cavalier King Charles Spaniel	Female	Ruby	2013-11-19	2012-06-10	1.44	c	Yes	Good	No	No	Grade 2	2	0	Grade 0	2	0	0	2:C3-C4	0	0	0	0	1	C	Best	M	Yes	2
Cavalier King Charles Spaniel	Female	Ruby	2015-01-21	2012-06-10	2.61	c	Yes	Yes	No	No	Grade 2	2	0	Grade 0	0	0	0	0	0	0	0	0	0	A	Best	M	Yes	2
Cavalier King Charles Spaniel	Female	Blenheim	2013-05-31	2011-07-17	1.87	c	Yes	Goed	No	Geen	Grade 2	3	0	Grade 2	6	1	0	1:C2-C5	4	0	2	0	0	E	Best	L	No
Cavalier King Charles Spaniel	female (*)	Tricolor (*)	2011-10-25	2008-12-19	2.85	c	Unknown		Unknown	Unknown	Grade 2	3	0	Grade 0	1	0	0	2:C2-C5	0	0	3	3	1.5	A	Best		No
Cavalier King Charles Spaniel			2011-09-26	2008-12-19	2.77	c	Unknown		Unknown	Unknown	Grade 2	3	0	Grade 0	1	0	0	2:C2-C5	0	0	3	3	1.5	A	Best		No
Cavalier King Charles Spaniel	male (*)	Blenheim (*)	2009-09-30	2003-10-14	5.96	a	Unknown		Unknown	Unknown	Grade 2	3	0	Grade 0	0	0	0	0	0	0	0	0	0	A	Best		No
Cavalier King Charles Spaniel	Male	Blenheim	2013-07-01	2012-06-06	1.07	c	Yes		No	Geen	Grade 2	3	0	Grade 0	1	0	0	2:C2-C5	0	0	1	2	0	C	Best	M	Yes	2
Cavalier King Charles Spaniel	Male	Blenheim	2014-12-16	2012-06-06	2.53	c	Yes	Yes	No	No	Grade 2	2	0	Grade 1	3	0	0	2:C3	1	0	0	0	1	A	Best	M	Yes	2
Cavalier King Charles Spaniel	Sire	Blenheim	2012-01-24	2009-07-09	2.54	c	ja	Goed	Unknown	No information was provided	Grade 2	3	0	Grade 1	3	1	0	1:C3	0.9	0	0	0	1	A	Best	N	No
Cavalier King Charles Spaniel	Female	Blenheim	2012-01-24	2009-07-09	2.54	c	ja	Goed	Unknown	No information was provided	Grade 2	3	0	Grade 0	2	0	0	2:C2-C4	0	0	0	0	1	A	Best	N	No
Cavalier King Charles Spaniel	Female	Blenheim	2012-01-24	2009-07-09	2.54	c	ja	Goed	Unknown	No information was provided	Grade 2	3	0	Grade 2	4	1	0	1:C2-C4	2.6	0	2	2	1	D	Best	N	No
Cavalier King Charles Spaniel			2011-09-26	2009-08-21	2.1	c	Unknown		Unknown	Unknown	Grade 2	3	0	Grade 2	4	1	0	1:C3	2.4	0	2	0	1	E	Best		No
Cavalier King Charles Spaniel	teef	Blenheim	2012-03-19	2009-08-21	2.58	c	ja	Goed	No	No info provided	Grade 2	2	0	Grade 2	5	1	0	1:C3	3	0	0	0	0	D	Best	L	No
Cavalier King Charles Spaniel	Female	Tricolour	2013-11-11	2010-01-22	3.8	b	Yes	Good	no	No	Grade 2	2	0	Grade 0	1	0	0	2:C2-C5	0	0	3	3	0	A	Best	M	No
Cavalier King Charles Spaniel	Female	Blenheim	2014-11-07	2012-12-30	1.85	c	Yes	Good	No	No	Grade 2	3	0	Grade 0	1	0	0	2:C3	0	0	0	0	1	C	Best	M	No
Cavalier King Charles Spaniel	Female	Tricolour	2012-06-19	2009-09-04	2.79	c	yes	Good	No	No info provided	Grade 2	2	0	Grade 0	1	0	0	0	0	0	0	0	0	A	Best	L	No
Cavalier King Charles Spaniel	Female	Blenheim	2013-11-11	2010-01-22	3.8	b	Yes	Good	no	No	Grade 2	3	2	Grade 1	3	1	0	2:C3	1.8	0	3	0	1	A	Best	M	No
Cavalier King Charles Spaniel	Female	Blenheim	2013-11-11	2010-01-22	3.8	b	Yes	Good	no	No	Grade 2	3	2	Grade 1	3	1	0	1:C3	1	0	3	3	1	A	Best	M	No
Cavalier King Charles Spaniel	Male	Tricolour	2015-01-19	2013-03-03	1.88	c	Yes	Yes	No	No	Grade 2	3	0	Grade 0	1	0	0	2:C1-C4	0	0	0	0	1.5	C	Best	M	No
Cavalier King Charles Spaniel	Male	Blenheim	2015-10-20	2013-04-17	2.51	c	Yes	Yes	No	Unknown	Grade 2	3	0	Grade 0	2	0	0	2:C3-C4	0	0	0	0	1.5	A	Best	M	No
Cavalier King Charles Spaniel	Female	Black and Tan	2012-04-24	2010-10-13	1.53	c	yes	Good	No	No info provided	Grade 2	2	0	Grade 0	1	0	0	0	0	0	0	0	1	C	Best	P	No
Cavalier King Charles Spaniel	Male	Blenheim	2015-01-19	2013-08-10	1.44	c	Yes	Yes	No	No	Grade 2	2	2	Grade 0	0	0	0	0	0	0	0	0	1.5	C	Best	M	No
Cavalier King Charles Spaniel	Male	Blenheim	2015-01-22	2014-01-22	1	c	Yes	Yes	No	No	Grade 2	2	5	Grade 0	1	0	0	2:C2-C4	0	0	0	0	1.5	C	Best	M	No
Cavalier King Charles Spaniel	female (*)	Tricolor (*)	2011-10-25	2007-04-14	4.53	b	Unknown		Unknown	Unknown	Grade 2	3	0	Grade 0	1	0	0	2:C2-C4	0	0	0	1	1	A	Best		No
Cavalier King Charles Spaniel	Female	Blenheim	2012-06-29	2011-02-02	1.41	c	yes	Good	No	No info provided	Grade 2	3	2	Grade 1	3	0	0	2:C2-C3	0.5	1	0	0	1	C	Best	L	Yes	2
Cavalier King Charles Spaniel	Female	Blenheim	2014-08-20	2011-02-02	3.55	b	Yes	Good	No	No	Grade 2	2	2	Grade 1	2	1	0	1:C2-C3	0.7	2	0	0	1	A	Best	M	Yes	2
Cavalier King Charles Spaniel	Female	Tricolour	2015-03-10	2012-09-01	2.53	c	Yes	Yes	No	No	Grade 2	2	0	Grade 2	5	1	3	1:C1-C4	4	0	3	3	1	D	Orion	M	No
Cavalier King Charles Spaniel	female (*)	Blenheim (*)	2010-04-07	2005-05-01	4.93	b	Unknown		Unknown	Unknown	Grade 2	3	0	Grade 2	5	1	3	1:C2-C5	3.3	0	3	3	1	D	Best		No
Cavalier King Charles Spaniel			2007-06-29	2004-11-03	2.66	c	Unknown		Unknown	Unknown	Grade 2	3	0	Grade 0	0	0	0	0	0	0	0	0	0	A	Best		No
Cavalier King Charles Spaniel	female (*)	Blenheim (*)	2009-04-10	2006-02-09	3.17	b	Unknown		Unknown	Unknown	Grade 2	3	0	Grade 1	3	1	2	1:C2-C4	1.7	0	0	0	0	A	Best		No
Cavalier King Charles Spaniel	Female	Tricolour	2012-02-10	2010-12-08	1.17	c	ja	Goed	No	Geen informatie vermeld	Grade 2	3	0	Grade 1	3	0	0	2:C2-C4	1.5	0	0	0	1	C	Best	N	Yes	2
Cavalier King Charles Spaniel	Female	Tricolour	2013-06-14	2010-01-08	3.43	b	Yes	Ligt niet goed recht	No	Geen	Grade 2	3	1	Grade 1	3	0	0		1	0	0	0	0	A	Best	L	Yes	2
Cavalier King Charles Spaniel	Male	Blenheim	2014-07-22	2012-01-04	2.55	c	Yes	Good	No	No	Grade 2	3	0	Grade 0	0	0	0	0	0	0	0	0	0	A	Best	M	No
Cavalier King Charles Spaniel	Female	Blenheim	2015-03-06	2014-02-09	1.08	c	Yes	Yes	No	No	Grade 2	3	0	Grade 0	1	0	0	2:C2-C4	0	0	0	0	0	C	Best	M	No
Cavalier King Charles Spaniel	female (*)	Black and tan (*)	2011-08-31	2009-02-22	2.53	c	Unknown		Unknown	Unknown	Grade 2	3	0	Grade 0	1	0	0	2:C2-C6	0	0	0	0	1	A	Best		No
Cavalier King Charles Spaniel	Female	Blenheim	2013-08-16	2012-05-09	1.27	c	Yes	Good	No	No	Grade 2	3	1	Grade 0	1	0	0		0	2	1	0	1	C	Best	M	Yes	2
Cavalier King Charles Spaniel	Female	Blenheim	2014-11-14	2012-05-09	2.51	c	Yes	Good	No	No	Grade 2	2	2	Grade 0	1	0	0	0	0	2	1	0	0	A	Best	M	Yes	2
Cavalier King Charles Spaniel	female (*)	Blenheim (*)	2010-09-03	2008-12-27	1.68	c	Unknown		Unknown	Unknown	Grade 2	3	0	Grade 1	0	1	0	1:C3	0.5	0	0	0	0	C	Best		Yes	2
Cavalier King Charles Spaniel	female (*)	Blenheim (*)	2011-07-26	2008-12-27	2.58	c	Unknown		Unknown	Unknown	Grade 2	3	0	Grade 1	3	1	0	1:C3	1.9	0	0	0	0	A	Best		Yes	2
Cavalier King Charles Spaniel	female (*)	Blenheim (*)	2009-09-25	2007-02-26	2.58	c	Unknown		Unknown	Unknown	Grade 2	2	0	Grade 2	6	1	0	1:C2-C4	4.7	0	0	0	1	D	Best		No
Cavalier King Charles Spaniel	Female	Tricolor	2011-07-26	2009-10-04	1.81	c	Unknown		No	Unknown	Grade 2	3	0	Grade 0	0	0	0	0	0	0	0	0	1	C	Best		Yes	2
Cavalier King Charles Spaniel	Female	Tricolor	2012-10-16	2009-10-04	3.03	b	yes	Good	No	No info provided	Grade 2	2	0	Grade 0	1	0	0	0	0	0	2	0	1	A	Dordrecht	S	Yes	2
Cavalier King Charles Spaniel	Male	Tricolour	2012-06-14	2011-04-26	1.13	c	yes	Good	No	No abnormalities	Grade 2	2	0	Grade 0	1	0	0	0	0	0	0	0	1	C	MCD	L	No
Cavalier King Charles Spaniel	Female	Blenheim	2014-11-04	2013-09-14	1.14	c	Yes	Good	No	No	Grade 2	3	0	Grade 0	1	0	0	2:C2-C4	0	0	0	0	0	C	Best	M	No
Cavalier King Charles Spaniel	female (*)	Blenheim (*)	2009-09-25	2007-02-26	2.58	c	Unknown		Unknown	Unknown	Grade 2	3	0	Grade 0	1	0	0	2:C2-C3	0	0	0	0	1	A	Best		No
Cavalier King Charles Spaniel	Female	Blenheim	2014-11-14	2013-11-03	1.03	c	Yes	Good	No	No	Grade 2	2	0	Grade 0	1	0	0	2:C3	0	0	1	1	0	C	Best	M	No
Cavalier King Charles Spaniel	Male	Tricolour	2013-01-18	2012-01-11	1.02	c	Yes	Yes	No	Onbekend	Grade 2	3	0	Grade 0	1	0	0	2:C2-C5	0	0	0	0	0	C	Best	M	Yes	2
Cavalier King Charles Spaniel	Male	Tricolour	2014-07-22	2012-01-11	2.53	c	Yes	Good	No	No	Grade 2	4	0	Grade 1	3	0	0	2:C3-C4	1	0	1	0	0	A	Best	M	Yes	2
Cavalier King Charles Spaniel	Male	Tricolour	2014-09-05	2013-08-30	1.01	c	Yes	Good	No	No	Grade 2	2	2	Grade 0	1	0	0	2:C1-C3	0	0	0	0	0	C	Best	M	No
Cavalier King Charles Spaniel	female (*)	Ruby (*)	2008-04-24	2004-05-06	3.97	b	Unknown		Unknown	Unknown	Grade 2	3	0	Grade 0	1	0	0	0	0	0	0	0	1	A	Best		No
Cavalier King Charles Spaniel	Female	Ruby	2012-06-04	2009-11-15	2.55	c	yes	Good	No	No info provided	Grade 2	2	0	Grade 0	1	0	0	0	0	0	0	0	0	A	Best	L	No
Cavalier King Charles Spaniel	Female	Tricolour	2014-12-19	2013-12-17	1.01	c	Yes	Yes	No	No	Grade 2	2	0	Grade 0	2	0	0	2:C3-C4	0	0	0	1	0	C	Best	M	No
Cavalier King Charles Spaniel	Male	Blenheim	2015-12-22	2014-12-21	1	c	Yes	Yes	no	Unknown	Grade 2	4	0	Grade 1	3	0	0	2:C2-C3	1	1	0	0	0	C	Best	M	No
Cavalier King Charles Spaniel	Female	Tricolour	2014-09-05	2013-05-20	1.29	c	Yes	Good	No	No	Grade 2	2	2	Grade 0	1	0	0	2:C2-C5	0	0	0	0	0	C	Best	M	No
Cavalier King Charles Spaniel	female (*)	Tricolor (*)	2010-05-28	2007-09-15	2.7	c	Unknown		Unknown	Unknown	Grade 2	3	0	Grade 0	0	0	0	0	0	0	0	1	1	A	Best		No
Cavalier King Charles Spaniel	Female	Black and Tan	2015-01-05	2013-10-29	1.18	c	Yes	Yes	No	No	Grade 2	3	0	Grade 1	2	0	0	2:C2-C3	0.8	0	0	0	0	C	Best	M	No
Cavalier King Charles Spaniel	female (*)	Black and tan (*)	2009-04-10	2002-05-16	6.9	a	Unknown		Unknown	Unknown	Grade 2	3	0	Grade 2	6	1	0	1:C2-C6	5.9	0	0	0	1	D	Best		No
Cavalier King Charles Spaniel	Female	Black and Tan	2011-10-21	2009-03-29	2.56	c	Yes	Good	no	No info provided	Grade 2	3	0	Grade 1	3	0	0	2:C2-C4	0.5	0	0	0	1	A	Best		No
Cavalier King Charles Spaniel	Male	Ruby	2012-11-19	2011-07-04	1.38	c	yes	Good	No	No info provided	Grade 2	3	0	Grade 1	3	0	1	2:C2-C3	1.49	0	2	2	1.5	E	Dordrecht	L	No
Cavalier King Charles Spaniel	Female	Ruby	2010-09-03	2008-11-12	1.81	c	Unknown		No	Unknown	Grade 2	3	0	Grade 1	3	0	ja	1:C2-C3	1	0	0	0	1	C	Best		Yes	2
Cavalier King Charles Spaniel	Female	Ruby	2011-10-21	2008-11-12	2.94	b	Yes	Good	no	No info provided	Grade 2	3	0	Grade 1	3	1	0	1:C2-C4	1	0	0	0	1	A	Best		Yes	2
Cavalier King Charles Spaniel	female (*)	Black and tan (*)	2009-09-25	2006-12-21	2.76	c	Unknown		Unknown	Unknown	Grade 2	3	0	Grade 1	3	1	0	1:C3	0.5	0	0	1	1	A	Best		No
Cavalier King Charles Spaniel	Female	Tricolour	2015-03-06	2014-02-09	1.08	c	Yes	Yes	No	No	Grade 2	2	0	Grade 0	1	0	0	2:C2-C4	0	0	0	0	0	C	Best	M	No
Cavalier King Charles Spaniel	female (*)	Tricolor (*)	2010-05-28	2007-11-07	2.56	c	Unknown		Unknown	Unknown	Grade 2	3	0	Grade 0	1	0	0	2:C2-C4	0	0	0	0	1	A	Best		No
Cavalier King Charles Spaniel	Female	Ruby	2011-12-27	2009-06-24	2.51	c	Yes	yes	No	No info provided	Grade 2	3	0	Grade 0	2	0	0	0	0	0	0	0	1	A	Best	Stefanie	No
Cavalier King Charles Spaniel	Teef	Blenheim	2012-02-10	2009-02-07	3.01	b	ja	Goed	Unknown	Geen informatie vermeld	Grade 2	3	0	Grade 2	4	1	0	1:C2-C4	2.35	0	1	2	1.5	D	Best	N	No
Cavalier King Charles Spaniel	Female	Tricolour	2013-01-18	2011-09-29	1.3	c	Yes	Yes	No	Onbekend	Grade 2	3	0	Grade 0	1	0	0	2:C2-C4	0	0	0	0	1	C	Best	M	Yes	2
Cavalier King Charles Spaniel	Female	Tricolour	2014-04-15	2011-09-29	2.54	c	Yes	Good	No	No	Grade 2	3	0	Grade 0	1	0	0	2:C2-C3	0	0	0	0	0	A	Best	M	Yes	2
Cavalier King Charles Spaniel	male (*)	Blenheim (*)	2008-05-15	2004-09-08	3.69	b	Unknown		Unknown	Unknown	Grade 2	3	0	Grade 1	3	1	0	1:C2-C6	1	0	0	0	1	A	Best		No
Cavalier King Charles Spaniel	Male	Black and Tan	2011-07-26	2010-06-23	1.09	c	Unknown		No	Unknown	Grade 2	3	0	Grade 1	3	0	0	2:C2-C5	1.3	0	0	0	1	C	Best		Yes	2
Cavalier King Charles Spaniel	Male	Black and Tan	2013-01-04	2010-06-23	2.53	c	Yes	Yes	No	Onbekend	Grade 2	2	0	Grade 1	3	1	0	2:C2-C5	1.5	0	0	0	1	A	Best	P	Yes	2
Cavalier King Charles Spaniel	Female	Ruby	2011-11-18	2010-06-23	1.4	c	Yes	Good	no	No info provided	Grade 2	2	0	Grade 0	1	0	0	0	0	0	0	0	1	C	Best		Yes	2
Cavalier King Charles Spaniel	Female	Ruby	2013-01-04	2010-06-23	2.53	c	Yes	Yes	No	Onbekend	Grade 2	2	0	Grade 1	3	0	0	2:C2-C5	1.3	0	1	0	0	A	Best	P	Yes	2
Cavalier King Charles Spaniel	Female	Blenheim	2012-09-14	2007-02-27	5.55	a	yes	Poor	No	No info provided	Grade 2	3	0	Grade 1	3	0	0	2:C2-C4	1	0	0	1	0	A	MCD	L	No
Cavalier King Charles Spaniel	female (*)	Ruby (*)	2008-06-12	2008-03-17	0.24	c	Unknown		Unknown	Unknown	Grade 2	3	0	Grade 2	4	1	0	1:C2-C3	2.1	0	0	1	1	E	Best		No
Cavalier King Charles Spaniel	Female	Ruby	2015-06-19	2014-04-28	1.14	c	Yes	Yes	No	No	Grade 2	3	0	Grade 0	1	0	0	2:C2-C4	0	0	0	0	0	C	Best	M	No
Cavalier King Charles Spaniel	Male	Black and Tan	2015-02-11	2012-08-06	2.51	c	Yes	Yes	No	No	Grade 2	3	0	Grade 0	2	0	0	2:C2-C3	0	0	0	0	1	A	Best	M	Yes	2
Cavalier King Charles Spaniel	Male	Black and Tan	2013-10-01	2012-08-28	1.09	c	Yes	Good	no	No	Grade 2	2	0	Grade 0	3	1	3	2:C1-C6	0	0	0	0	0	C	Best	M	Yes	2
Cavalier King Charles Spaniel	Female	Black and Tan	2014-04-15	2012-08-06	1.69	c	Yes	Good	No	No	Grade 2	2	0	Grade 1	2	0	0	2:C2	1	0	1	1	0	C	Best	M	No
Cavalier King Charles Spaniel	female	Ruby	2012-06-14	2011-01-18	1.41	c	yes	Good	No	No abnormalities	Grade 2	2	0	Grade 0	1	0	0	0	0	0	3	3	1	C	MCD	L	Yes	2
Cavalier King Charles Spaniel	Female	Ruby	2013-08-16	2011-01-18	2.58	c	Yes	Good	No	No	Grade 2	3	1	Grade 0	1	0	0		0	0	1	2	1	A	Best	M	Yes	2
Cavalier King Charles Spaniel	Female	Blenheim	2013-06-14	2012-01-04	1.44	c	Yes	Goed	No	Geen	Grade 2	3	1	Grade 0	2	0	0	2:C2-C5	0	0	0	2	1	C	Best	L	Yes	2
Cavalier King Charles Spaniel	Female	Blenheim	2015-01-05	2012-01-04	3	b	Yes	Yes	No	No	Grade 2	3	1	Grade 1	3	1	3	1:C3	1.6	0	3	3	1	A	Best	M	Yes	2
Cavalier King Charles Spaniel	Female	Blenheim	2013-11-15	2012-10-02	1.12	c	Yes	Good	No	No	Grade 2	2	0	Grade 0	2	0	0	2:C3-C4	0	0	0	0	0	C	Best	M	Yes	2
Cavalier King Charles Spaniel	Female	Blenheim	2015-06-19	2012-10-02	2.71	c	Yes	Yes	No	No	Grade 2	2	5	Grade 0	2	0	0	2:C2-C5	0	0	0	0	1.5	A	Best	M	Yes	2
Cavalier King Charles Spaniel	Female	Blenheim	2012-10-16	2010-04-12	2.51	c	yes	Good	No	No info provided	Grade 2	2	0	Grade 0	1	0	0	0	0	0	2	0	1	A	Dordrecht	S	Yes	2
Cavalier King Charles Spaniel	Female	Blenheim	2011-11-18	2010-04-12	1.6	c	Yes	Good	no	No info provided	Grade 2	3	0	Grade 0	1	0	0	0	0	0	0	0	1	C	Best		Yes	2
Cavalier King Charles Spaniel	Female	Blenheim	2013-10-17	2012-02-15	1.67	c	Yes	Good	no	No	Grade 2	3	0	Grade 0	1	0	0	2:C3-C4	0	0	0	0	0	C	Best	M	Yes	2
Cavalier King Charles Spaniel	Female	Blenheim	2014-11-07	2012-02-15	2.73	c	Yes	Good	No	No	Grade 2	3	0	Grade 0	1	0	0	2:C3	0	0	0	0	0	A	Best	M	Yes	2
Cavalier King Charles Spaniel	Female	Ruby	2013-01-18	2011-05-04	1.71	c	Yes	Yes	No	Onbekend	Grade 2	2	0	Grade 0	1	0	0	2:C2-C4	0	0	0	0	0	C	Best	M	Yes	2
Cavalier King Charles Spaniel	Female	Ruby	2013-11-15	2011-05-04	2.53	c	Yes	Good	No	No	Grade 2	3	0	Grade 0	2	0	0	2:C3-C4	0	0	0	0	0	A	Best	M	Yes	2
Cavalier King Charles Spaniel	Male	Blenheim	2014-11-04	2013-11-03	1	c	Yes	Good	No	No	Grade 2	3	0	Grade 1	2	0	0	2:C2-C4	0.8	1	0	1	0	C	Best	M	No
Cavalier King Charles Spaniel	Female	Black and Tan	2015-03-06	2012-08-06	2.58	c	Yes	Yes	No	No	Grade 2	2	0	Grade 0	1	0	0	2:C2-C4	0	0	0	0	1	A	Best	M	No
Cavalier King Charles Spaniel	female (*)	Blenheim (*)	2008-04-24	2005-04-29	2.99	b	Unknown		Unknown	Unknown	Grade 2	3	0	Grade 1	2	0	0	2:C2-C4	0.5	0	0	0	1	A	Best		No
Cavalier King Charles Spaniel	female (*)	Ruby (*)	2010-01-22	2006-12-21	3.09	b	Unknown		Unknown	Unknown	Grade 2	3	0	Grade 2	5	1	3	1:C2-C5	3.9	0	0	0	1	D	Best		No
Cavalier King Charles Spaniel	female (*)	Blenheim (*)	2010-01-22	2007-02-27	2.9	c	Unknown		Unknown	Unknown	Grade 2	3	0	Grade 0	1	0	0	2:C2-C4	0	0	0	3	1	A	Best		No
Cavalier King Charles Spaniel			2007-06-29	2004-12-13	2.54	c	Unknown		Unknown	Unknown	Grade 2	3	0	Grade 2	5	1	3	1:C3-C4	3	0	2	2	1	D	Best		No
Cavalier King Charles Spaniel			2007-06-29	2004-12-13	2.54	c	Unknown		Unknown	Unknown	Grade 2	2	0	Grade 2	4	1	0	1:C2-C3	2.2	0	0	0	1	D	Best		No
Cavalier King Charles Spaniel	female (*)		2008-07-08	2005-07-13	2.99	b	Unknown		Unknown	Unknown	Grade 2	2	0	Grade 0	0	0	0	0	0	0	3	3	1	A	Best		Yes	2
Cavalier King Charles Spaniel	female (*)		2008-08-04	2005-07-13	3.06	b	Unknown		Unknown	Unknown	Grade 2	3	0	Grade 0	0	0	0	0	0	0	3	3	1	A	Best		Yes	2
Cavalier King Charles Spaniel	female (*)	Blenheim (*)	2011-10-20	2009-03-21	2.58	c			Unknown		Grade 2	2	0	Grade 0	1	0	0	2:C2-C4	0	1	0	0	0	A	Best		No
Cavalier King Charles Spaniel	Female	Blenheim	2011-10-20	2010-05-19	1.42	c			No		Grade 2	2	0	Grade 0	1	0	0	2:C2-C5	0	0	0	0	0	C	Best		Yes	2
Cavalier King Charles Spaniel	Female	Blenheim	2013-12-04	2010-05-19	3.54	b	Yes	Good	No	No	Grade 2	2	1	Grade 0	1	0	0	0	0	0	0	0	0	A	Best	L	Yes	2
Cavalier King Charles Spaniel	Female	Ruby	2012-09-27	2010-11-20	1.85	c	yes	Poor	No	No murmur	Grade 2	2	0	Grade 0	1	0	0	0	0	0	2	2	0	C	MCD	M	Yes	2
Cavalier King Charles Spaniel	Female	Ruby	2013-11-22	2010-11-20	3.01	b	Yes	Good	no	No	Grade 2	3	0	Grade 0	2	0	0	2:C3	0	0	3	0	1	A	MCD	M	Yes	2
Cavalier King Charles Spaniel	Female	Tricolour	2013-12-04	2011-05-30	2.51	c	Yes	Good	No	No	Grade 2	2	0	Grade 0	0	0	0	0	0	1	0	0	0	A	Best	L	No
Cavalier King Charles Spaniel	Male	Black and Tan	2014-03-04	2011-10-29	2.35	c	Yes	Good	no	No	Grade 2	2	0	Grade 0	0	0	0	2:C3-C4	0	0	0	0	0	C	Best	M	No
Cavalier King Charles Spaniel	Female	Blenheim	2013-09-18	2012-04-26	1.39	c	Yes	Good	no	No	Grade 2	2	0	Grade 0	2	1	0	0	0	0	3	3	1	C	Orion	M	No
Cavalier King Charles Spaniel	Female	Tricolour	2015-06-16	2013-03-09	2.27	c	Yes	Yes	No	No	Grade 2	2	0	Grade 0	1	0	0	0	0	0	1	1	0	A	Orion	M	No
Cavalier King Charles Spaniel	Female	Tricolour	2015-10-28	2012-09-13	3.13	b	Yes	Yes	No	Unknown	Grade 2	3	0	Grade 0	0	0	0	0	0	0	0	0	1.5	A	Best	M	No
Cavalier King Charles Spaniel	Female	Tricolour	2013-02-19	2011-07-04	1.63	c	Yes	Yes	No	Onbekend	Grade 2	2	0	Grade 1	3	1	0	1:C3	0.5	0	0	0	1	C	Best	P	Yes	2
Cavalier King Charles Spaniel	Female	Tricolour	2014-02-26	2011-07-04	2.64	c	Yes	Good	No	No	Grade 2	2	0	Grade 1	3	0	0	0	1.5	0	0	0	1	A	Best	M	Yes	2
Cavalier King Charles Spaniel	female (*)	Blenheim (*)	2010-10-05	2007-11-29	2.85	c	Unknown		Unknown	Unknown	Grade 2	3	0	Grade 0	1	0	0	2:C1-C5	0	0	0	0	1	A	Best		No
Cavalier King Charles Spaniel	female (*)	Ruby (*)	2010-12-29	2008-06-21	2.52	c	Unknown		Unknown	Unknown	Grade 2	3	0	Grade 0	1	0	0	2:C2-C6	0	0	0	3	1	A	Best		No
Cavalier King Charles Spaniel	female (*)	Blenheim (*)	2011-08-26	2008-12-05	2.73	c	Unknown		Unknown	Unknown	Grade 2	3	0	Grade 2	6	1	0	1:C2-C5	5.6	0	3	3	1	D	Best		No
Cavalier King Charles Spaniel	Female	Blenheim	2013-12-19	2008-12-05	5.04	a	Yes	Good	Present	No	Grade 2	2	1	Grade 2	6	1	3	1:C2-C4	5	0	3	3	0	F	Best	P	No
Cavalier King Charles Spaniel	female (*)	Blenheim (*)	2007-06-30	2006-10-27	0.68	c	Unknown		Unknown	Unknown	Grade 2	3	0	Grade 0	1	0	0	0	0	0	0	0	1	C	Meppel		No
Cavalier King Charles Spaniel	female (*)	Blenheim (*)	2011-10-18	2010-03-25	1.56	c			Unknown		Grade 2	3	0	Grade 0	0	0	0	0	0	0	0	0	1	C	Best		No
Cavalier King Charles Spaniel	Female	Tricolour	2014-09-04	2013-08-28	1.02	c	Yes	no	Present	No	Grade 2	3	niet te beoordelen	Grade 2	6	1	3	1:C2-C5	5	0	0	0	1	F	Best	M	No
Cavalier King Charles Spaniel	Female	Blenheim	2012-07-26	2010-03-12	2.37	c	yes	Good	No	No info provided	Grade 2	3	0	Grade 0	2	0	0	2:C2-C6	0	0	0	0	0	C	Dordrecht	N	Yes	2
Cavalier King Charles Spaniel	Female	Blenheim	2014-02-27	2010-03-12	3.96	b	Yes	Poor	No	No	Grade 2	2	0	Grade 0	0	0	0	0	0	0	0	0	0	A	Dordrecht	M	Yes	2
Cavalier King Charles Spaniel	Male	Blenheim	2013-04-29	2009-11-08	3.48	b	Yes	Goed	Present	Yes (4/6)	Grade 2	2	0	Grade 0	1	0	0	0	0	0	0	0	0	F	Dordrecht	S	No
Cavalier King Charles Spaniel	teef	Tricolour	2012-01-30	2009-06-02	2.66	c	ja	Goed	No	Geen info vermeld	Grade 2	3	0	Grade 2	5	1	0	1:C2-C6	3.75	0	0	0	1.5	D	Best	L	No
Cavalier King Charles Spaniel	Male	Tricolour	2013-08-22	2012-04-25	1.33	c	Yes	Good	No	No	Grade 2	2	1	Grade 0	1	0	0		0	0	1	2	1	C	Best	M	Yes	2
Cavalier King Charles Spaniel	Male	Tricolour	2015-02-03	2012-04-25	2.77	c	Yes	Yes	No	No	Grade 2	2	0	Grade 0	2	0	0	2:C2-C4	0	0	2	0	1	A	Best	M	Yes	2
Cavalier King Charles Spaniel	female (*)		2011-09-07	2006-08-23	5.04	a	Unknown		Unknown	Unknown	Grade 2	3	0	Grade 0	0	0	0	0	0	0	3	3	1	A	Best		No
Cavalier King Charles Spaniel	Female	Tricolour	2014-11-05	2012-04-25	2.53	c	Yes	Good	No	No	Grade 2	2	0	Grade 0	2	0	0	2:C2-C4	0	0	2	0	0	A	Best	M	No
Cavalier King Charles Spaniel	Female	Blenheim	2014-02-19	2010-09-29	3.39	b	Yes	Good	no	No	Grade 2	3	0	Grade 0	0	0	0	0	0	0	0	0	0	A	Best	M	No
Cavalier King Charles Spaniel	Male	Blenheim	2015-07-24	2012-10-06	2.8	c	Yes	Yes	No	No	Grade 2	3	0	Grade 0	0	0	0	0	0	0	0	0	0	A	Best	M	No
Cavalier King Charles Spaniel	Female	Blenheim	2015-10-08	2012-09-21	3.05	b	Yes	Yes	No	Unknown	Grade 2	3	2	Grade 1	3	1	0	1:C2-C4	1	0	0	0	0	A	Orion	M	No
Cavalier King Charles Spaniel	female (*)	Blenheim (*)	2007-06-06	2006-11-06	0.58	c	Unknown		Unknown	Unknown	Grade 2	3	0	Grade 0	0		0	0	0	0	0	0	1	C	Best		No
Cavalier King Charles Spaniel	female (*)	Blenheim (*)	2007-06-06	2007-01-01	0.43	c	Unknown		Unknown	Unknown	Grade 2	3	0	Grade 0	0		0	0	0	0	0	0	1	C	Best		Yes	2
Cavalier King Charles Spaniel	female (*)	Blenheim (*)	2009-11-13	2006-11-06	3.02	b	Unknown		Unknown	Unknown	Grade 2	2	0	Grade 1	3	0	0	2:C2-C4	0.5	0	0	0	1	A	Best		Yes	2
Cavalier King Charles Spaniel			2007-05-29	2006-11-06	0.56	c	Unknown		Unknown	Unknown	Grade 2	2	0	Grade 0	0	0	0	0	0	0	0	0	1	C	Best		Yes	2
Cavalier King Charles Spaniel			2011-12-19	2006-11-06	5.12	a	Unknown		Unknown	Unknown	Grade 2	3	0	Grade 2	6	1	0	1:C2-C6	4.8	0	0	1	1	D	Best		Yes	2
Cavalier King Charles Spaniel	female (*)	Blenheim (*)	2007-05-29	2006-11-06	0.56	c	Unknown		Unknown	Unknown	Grade 2	2	0	Grade 0	0	0	0	0	0	0	0	0	1	C	Best		No
Cavalier King Charles Spaniel	female (*)		2011-01-31	2008-07-22	2.53	c	Unknown		Unknown	Unknown	Grade 2	3	0	Grade 0	0	0	0	0	0	0	0	1	1	A	Best		No
Cavalier King Charles Spaniel	Female	Blenheim	2008-02-20	2006-11-06	1.29	c	Unknown		no	Unknown	Grade 2	3	0	Grade 0	1	0	0	2:C2-C5	0	0	0	0	1	C	Best		Yes	2
Cavalier King Charles Spaniel	Female	Blenheim	2011-02-24	2006-11-06	4.3	b	Yes	Good	No	No info provided	Grade 2	2	0	Grade 0	2	0	0	2:C2-C6	0	0	3	3	1	A	Best	Stefanie	Yes	2
Cavalier King Charles Spaniel	Female	Blenheim	2013-06-24	2012-03-15	1.28	c	Yes	T2: not aligned	No	Geen	Grade 2	3	0	Grade 1	3	1	0	1:C2-C3	1.5	0	0	0	0	C	Best	M	No
Cavalier King Charles Spaniel	female (*)	Blenheim (*)	2011-03-29	2008-04-23	2.93	c	Unknown		Unknown	Unknown	Grade 2	2	0	Grade 1	3	0	0	2:C2-C6	0.5	0	0	0	1	A	Best		No
Cavalier King Charles Spaniel			2007-05-15	2003-08-15	3.75	b	Unknown		Unknown	Unknown	Grade 2	2	0	Grade 0	1	0	0	0	0	0	0	3	1	A	Best		No
Cavalier King Charles Spaniel	Male	Blenheim	2013-06-17	2012-03-15	1.26	c	Yes	Goed	No	Geen	Grade 2	2	0	Grade 0	1	0	0	2:C2-C5	0	0	0	0	0	C	Best	L	No
Cavalier King Charles Spaniel	Female	Blenheim	2013-12-02	2011-09-20	2.2	c	Yes	Good	No	No	Grade 2	3	0	Grade 0	0	0	0	0	0	0	0	0	0	C	Best	L	Yes	2
Cavalier King Charles Spaniel	Female	Blenheim	2015-06-17	2011-09-20	3.74	b	Yes	Yes	No	No	Grade 2	2	0	Grade 0	1	0	0	2:C3-C4	0	0	0	0	0	A	Best	M	Yes	2
Cavalier King Charles Spaniel	male (*)	Tricolor (*)	2007-06-30	2004-06-07	3.06	b	Unknown		Unknown	Unknown	Grade 2	3	0	Grade 1	3	1	0	1:C3	1	0	0	0	0	A	Meppel		No
Cavalier King Charles Spaniel	Female	Blenheim	2015-09-29	2013-03-09	2.56	c	Yes	Yes	No	Unknown	Grade 2	2	0	Grade 0	2	0	0	2:C2-C3	0	0	0	0	0	A	Best	M	No
Cavalier King Charles Spaniel	Female	Ruby	2014-10-17	2012-02-05	2.7	c	Yes	Good	No	No	Grade 2	3	0	Grade 2	5	1	0.3	1:C2-C4	3.5	2	0	0	0	D	Best	M	No
Cavalier King Charles Spaniel	Female	Blenheim	2014-05-01	2013-03-09	1.14	c	Yes	Good	No	No	Grade 2	3	0	Grade 0	1	0	0	0	0	0	0	0	0	C	Best	M	No
Cavalier King Charles Spaniel	Female	Black and Tan	2012-03-29	2008-04-26	3.93	b	yes	Good	No	No info provided	Grade 2	3	0	Grade 1	3	0	0	2:C2-C4	0.5	0	2	0	0	A	Best	N	No
Cavalier King Charles Spaniel	Female	Black and Tan	2013-10-08	2011-10-21	1.96	c	Yes	Good	no	No	Grade 2	3	1	Grade 2	6	1	0	2:C2-C4	4.1	0	0	0	0	E	Best	M	No
Cavalier King Charles Spaniel	Female	Black and Tan	2015-10-05	2014-07-25	1.19	c	Yes	Yes	No	Unknown	Grade 2	3	0	Grade 0	2	0	0	2:C1-C6	0	0	1	1	0	C	Best	M	No
Cavalier King Charles Spaniel	male (*)	Tricolor (*)	2010-09-22	2008-02-19	2.59	c	Unknown		Unknown	Unknown	Grade 2	3	0	Grade 1	3	0	0	2:C2-C3	0.5	0	0	0	1	A	Best		No
Cavalier King Charles Spaniel	male (*)	Ruby (*)	2011-01-31	2009-12-04	1.16	c	Unknown		Unknown	Unknown	Grade 1	1	0	Grade 1	3	1	0	1:C2	1.3	0	0	0	1	C	Best		No
Cavalier King Charles Spaniel	Female	Blenheim	2015-03-31	2013-09-04	1.58	c	Yes	Yes	No	No	Grade 2	2	0	Grade 0	0	0	0	0	0	0	0	0	0	C	Best	M	No
Cavalier King Charles Spaniel	Female	Tricolour	2013-05-31	2010-11-18	2.54	c	Yes	Goed	No	Geen	Grade 2	3	0	Grade 1	3	1	0	1:C2-C4	1	0	0	0	1	A	Best	P	No
Cavalier King Charles Spaniel	female (*)	Black and tan (*)	2011-06-08	2008-02-04	3.34	b	Unknown		Unknown	Unknown	Grade 2	3	0	Grade 1	3	0	0	2:C2-C4	0.5	0	2	0	1	A	Best		No
Cavalier King Charles Spaniel	female (*)	Ruby (*)	2011-06-08	2008-09-05	2.76	c	Unknown		Unknown	Unknown	Grade 2	2	0	Grade 1	3	0	0	2:C2-C6	0.5	0	0	0	1	A	Best		No
Cavalier King Charles Spaniel	female (*)	Blenheim (*)	2011-06-08	2008-12-08	2.5	c	Unknown		Unknown	Unknown	Grade 2	3	0	Grade 0	0	0	0	0	0	0	0	0	0	A	Best		No
Cavalier King Charles Spaniel	male (*)	Blenheim (*)	2008-10-21	2004-03-03	4.63	b	Unknown		Unknown	Unknown	Grade 2	3	0	Grade 0	1	0	0	0	0	0	0	0	0	A	Best		No
Cavalier King Charles Spaniel	male (*)		2009-12-23	2007-07-15	2.44	c	Unknown		Unknown	Unknown	Grade 2	3	0	Grade 0	1	0	0	2:C2-C4	0	0	0	3	1	C	Best		Yes	2
Cavalier King Charles Spaniel	male (*)		2010-11-16	2007-07-15	3.34	b	Unknown		Unknown	Unknown	Grade 2	3	0	Grade 0	1	0	0	2:C1-C4	0	0	0	3	1	A	Best		Yes	2
Cavalier King Charles Spaniel	Female	Blenheim	2015-12-29	2012-09-01	3.33	b	Yes	Yes	no	Unknown	Grade 2	3	0	Grade 0	0	0	0	0	0	0	2	0	1	A	Best	M	No
Cavalier King Charles Spaniel	Female	Black and Tan	2012-11-19	2010-05-18	2.5	c	Yes	Yes	No	Onbekend	Grade 2	3	0	Grade 1	3	0	0	2:C2-C5	1.2	0	2	2	1	D	Best	P	Yes	2
Cavalier King Charles Spaniel	Female	Black and Tan	2015-08-03	2010-04-01	5.34	a	Yes	Yes	No	No	Grade 2	2	0	Grade 1	3	1	0	1:C3	1.9	0	0	0	1.5	A	Best	M	Yes	2
Cavalier King Charles Spaniel	female (*)	Blenheim (*)	2010-12-29	2006-01-08	4.98	a	Unknown		Unknown	Unknown	Grade 2	3	0	Grade 1	3	0	0	2:C1-C5	0.5	0	0	0	1	A	Best		No
Cavalier King Charles Spaniel	Female	Tricolour	2014-07-17	2013-01-09	1.52	c	Yes	Good	No	No	Grade 2	3	0	Grade 0	1	0	0	2:C2-C4	0	0	0	0	1	C	Best	M	No
Cavalier King Charles Spaniel	Female	Tricolour	2015-07-09	2013-01-09	2.5	c	Yes	Yes	No	No	Grade 2	2	0	Grade 1	3	1	0	1:C2	1.2	0	0	2	1.5	A	Best	M	No
Cavalier King Charles Spaniel	Female	Blenheim	2009-11-13	2009-02-13	0.75	c	Unknown		No	Unknown	Grade 2	3	0	Grade 0	1	0	0	0	0	0	0	0	1	C	Best		Yes	2
Cavalier King Charles Spaniel	Female	Blenheim	2011-10-21	2009-02-13	2.69	c	Yes	Good	no	No info provided	Grade 2	2	0	Grade 0	1	0	0	0	0	0	0	0	0	A	Best		Yes	2
Cavalier King Charles Spaniel	female (*)	Tricolor (*)	2008-02-20	2007-06-28	0.64	c	Unknown		Unknown	Unknown	Grade 2	3	0	Grade 0	0	0	0	0	0	0	0	0	0	C	Best		Yes	2
Cavalier King Charles Spaniel	female (*)	Tricolor (*)	2010-04-13	2007-06-28	2.79	c	Unknown		Unknown	Unknown	Grade 2	2	0	Grade 0	0	0	0	0	0	0	0	0	1	A	Best		Yes	2
Cavalier King Charles Spaniel	Male	Blenheim	2012-06-19	2011-01-11	1.44	c	yes	Good	No	No info provided	Grade 2	2	0	Grade 0	1	0	0	0	0	0	0	1	0	C	Best	L	No
Cavalier King Charles Spaniel	Female	Blenheim	2015-12-28	2013-06-20	2.52	c	Yes	Yes	no	Unknown	Grade 2	2	0	Grade 0	0	0	0	0	0	0	2	2	1	A	Best	M	No
Cavalier King Charles Spaniel	Female	Black and Tan	2010-11-30	2009-06-04	1.49	c	Unknown		No	Unknown	Grade 2	3	0	Grade 1	3	0	0	2:C1-C4	0.5	1	0	0	1	C	Best		Yes	2
Cavalier King Charles Spaniel	Female	Black and Tan	2012-01-10	2009-06-04	2.6	c	ja	ja	No	Auscultatie: geen ruis 0/6	Grade 2	3	0	Grade 1	3	0	0	2:C3-C4	1.9	2	0	0	0	A	Best		Yes	2
Cavalier King Charles Spaniel	female (*)	Blenheim (*)	2011-06-28	2007-02-02	4.41	b	Unknown		Unknown	Unknown	Grade 2	3	0	Grade 1	3	1	0	1:C3	1	0	0	0	0	A	Best		No
Cavalier King Charles Spaniel	male (*)	Blenheim (*)	2009-09-22	2007-02-02	2.64	c	Unknown		Unknown	Unknown	Grade 2	2	0	Grade 2	5	1	2	1:C2-C4	3.7	0	0	0	1	D	Best		No
Cavalier King Charles Spaniel	Male	Black and Tan	2014-03-24	2011-07-31	2.65	c	Yes	Good	No	No	Grade 2	3	0	Grade 1	3	0	0	2:C1-C6	1.6	0	0	0	1	A	Best	M	No
Cavalier King Charles Spaniel	female (*)	Blenheim (*)	2011-09-15	2009-03-13	2.51	c	Unknown		Unknown	Unknown	Grade 2	3	0	Grade 0	1	0	0	0	0	0	1	1	1	A	Best		No
Cavalier King Charles Spaniel	Female	Ruby	2015-08-27	2013-11-30	1.74	c	Yes	Yes	No	Unknown	Grade 2	3	0	Grade 0	0	0	0	0	0	0	0	0	0	C	Best	M	No
Cavalier King Charles Spaniel	female (*)	Blenheim (*)	2011-02-01	2003-07-14	7.55	a	Unknown		Unknown	Unknown	Grade 2	3	0	Grade 1	3	1	0	1:C2-C4	1.8	0	0	1	1	A	Best		No
Cavalier King Charles Spaniel	female (*)	Black and tan (*)	2011-09-20	2008-10-16	2.93	c	Unknown		Unknown	Unknown	Grade 2	3	0	Grade 0	0	0	0	0	0	0	0	0	1	A	Best		No
Cavalier King Charles Spaniel	Female	Blenheim	2011-02-01	2009-06-28	1.59	c	Unknown		no	Unknown	Grade 2	3	0	Grade 0	0	0	0	0	0	0	0	0	1	C	Best		Yes	2
Cavalier King Charles Spaniel	Female	Blenheim	2012-02-27	2009-06-28	2.66	c	ja	Goed	No	Geen info vermeld	Grade 2	3	0	Grade 0	2	0	0	2:C2-C6	0	0	0	0	0	A	Best	L	Yes	2
Cavalier King Charles Spaniel	Female	Black and Tan	2013-04-17	2011-10-16	1.5	c			no		Grade 2	2	0	Grade 0	1	0	0	0	0	0	0	0	0	C	Best		Yes	2
Cavalier King Charles Spaniel	Female	Black and Tan	2014-10-22	2011-10-16	3.02	b	Yes	Good	No	No	Grade 2	2	0	Grade 0	2	1	0	1:C2-C4	0	0	1	1	1,5	A	Best	M	Yes	2
Cavalier King Charles Spaniel	female (*)	Tricolor (*)	2011-11-03	2010-06-09	1.4	c	Unknown		Unknown	Unknown	Grade 2	3	0	Grade 1	3	1	0	1:C2	1	0	0	0	1	C	Best		No
Cavalier King Charles Spaniel	female (*)	Tricolor (*)	2012-04-25	2010-06-06	1.89	c	Unknown		Unknown	Unknown	Grade 2	3	0	Grade 0	1	0	0	2:C2-C5	0	0	0	1	1	C	Best		No
Cavalier King Charles Spaniel	Female	Black and Tan	2014-09-24	2009-11-20	4.84	b	Yes	Good	No	No	Grade 2	3	0	Grade 1	3	1	0	1:C3	1.7	0	2	2	1	A	Best	P	No
Cavalier King Charles Spaniel	male (*)		2011-02-15	2010-01-07	1.11	c	Unknown		Unknown	Unknown	Grade 2	3	0	Grade 1	3	1	0	1:C3	1	0	0	0	1	C	Best		No
Cavalier King Charles Spaniel	male (*)	Blenheim (*)	2010-08-16	2008-05-14	2.26	c	Unknown		Unknown	Unknown	Grade 2	3	0	Grade 1	3	0	0	2:C2-C4	0.7	0	0	0	1	C	Best		No
Cavalier King Charles Spaniel	female (*)	Blenheim (*)	2009-07-09	2005-11-18	3.64	b	Unknown		Unknown	Unknown	Grade 2	3	0	Grade 2	4	1	0	1:C2-C4	2.6	0	0	2	1	D	Best		No
Cavalier King Charles Spaniel	female (*)	Tricolor (*)	2011-08-23	2008-07-25	3.08	b	Unknown		Unknown	Unknown	Grade 2	3	0	Grade 2	4	1	0	1:C3	2.4	0	0	0	1	D	Best		No
Cavalier King Charles Spaniel	Female	Black and Tan	2011-12-16	2010-04-01	1.71	c	Yes	Good	No	No info provided	Grade 2	3	0	Grade 2	4	1	0	1:C2-C3	2.3	0	2	2	1	E	Best	Stefanie	No
Cavalier King Charles Spaniel			2011-03-29	2007-10-28	3.42	b	Unknown		Unknown	Unknown	Grade 2	3	0	Grade 0	0	0	0	0	0	0	0	0	1	A	Best		No
Cavalier King Charles Spaniel	female (*)	Blenheim (*)	2011-04-28	2008-10-19	2.53	c	Unknown		Unknown	Unknown	Grade 2	3	0	Grade 0	0	0	0	0	0	0	0	0	1	A	Best		Yes	2
Cavalier King Charles Spaniel	female (*)	Blenheim (*)	2009-12-23	2008-10-19	1.18	c	Unknown		Unknown	Unknown	Grade 2	3	0	Grade 0	0	0	0	0	0	0	0	0	1	C	Best		Yes	2
Cavalier King Charles Spaniel	Female	Tricolour	2014-01-28	2010-07-04	3.57	b	Yes	Good	Present	No	Grade 2	3	4	Grade 2	4	1	0	2:C2-T1	2.3	0	0	0	0	F	Utrecht	M	No
Cavalier King Charles Spaniel	female (*)	Tricolor (*)	2010-01-05	2008-09-16	1.3	c	Unknown		Unknown	Unknown	Grade 2	3	0	Grade 0	1	0	0	2:C2-C5	0	0	0	3	1.5	C	Best		Yes	2
Cavalier King Charles Spaniel	female (*)	Tricolor (*)	2011-04-18	2008-09-16	2.59	c	Unknown		Unknown	Unknown	Grade 2	3	0	Grade 0	1	0	0	2:C2-C5	0	0	0	3	1.5	A	Best		Yes	2
Cavalier King Charles Spaniel	female (*)	Blenheim (*)	2009-07-09	2005-11-18	3.64	b	Unknown		Unknown	Unknown	Grade 2	3	0	Grade 0	1	0	0	1:C2-C6	0	0	3	0	1	A	Best		No
Cavalier King Charles Spaniel	Female	Blenheim	2014-09-19	2013-09-15	1.01	c	Yes	Good	No	No	Grade 2	3	0	Grade 0	1	0	0	2:C3-C4	0	0	0	0	0	C	Best	P	No
Cavalier King Charles Spaniel	male (*)		2011-09-26	2002-11-13	8.87	a	Unknown		Unknown	Unknown	Grade 2	2	0	Grade 1	3	0	0	2:C2-C6	0.5	0	3	3	1	A	Best		No
Cavalier King Charles Spaniel	Female	Blenheim	2013-04-04	2012-04-04	1	c	Yes	Good	no	Geen	Grade 2	3	0	Grade 1	1	0	0	0	1.55	0	0	0	0	C	Best	HAJ	Yes	2
Cavalier King Charles Spaniel	Female	Blenheim	2014-10-14	2012-04-04	2.53	c	Yes	Good	No	No	Grade 2	3	0	Grade 2	4	1	0	2:C2-C3	2.5	0	0	0	0	D	Best	M	Yes	2
Cavalier King Charles Spaniel	Female	Blenheim	2014-04-15	2013-04-12	1.01	c	Yes	Good	No	No	Grade 2	2	0	Grade 0	1	0	0	2:C2-C4	0	0	0	0	0	C	Best	M	No
Cavalier King Charles Spaniel	Female	Blenheim	2014-11-26	2013-10-02	1.15	c	Yes	Yes	No	No	Grade 2	3	0	Grade 0	0	0	0	0	0	0	0	0	0	C	Best	M	No
Cavalier King Charles Spaniel	Female	Blenheim	2014-10-09	2013-10-01	1.02	c	Yes	Good	No	No	Grade 2	2	0	Grade 0	1	0	0	2:C3-C4	0	0	0	0	0	C	Best	M	No
Cavalier King Charles Spaniel	female (*)	Black and tan (*)	2008-03-27	2003-07-20	4.69	b	Unknown		Unknown	Unknown	Grade 2	3	0	Grade 1	3	1	0	1:C3	1.7	0	0	2	1	A	Best		No
Cavalier King Charles Spaniel	Female	Tricolour	2012-07-05	2009-09-27	2.77	c	yes	Good	No	No info provided	Grade 2	3	0	Grade 0	2	0	0	2:C2-C6	0	0	0	1	0	A	Best	L	No
Cavalier King Charles Spaniel	Female	Black and Tan	2014-08-18	2013-07-25	1.06	c	Yes	Good	No	No	Grade 2	2	0	Grade 0	1	0	0	2:C1-C6	0	0	0	0	1	C	Best	M	No
Cavalier King Charles Spaniel	Female	Blenheim	2015-04-01	2014-03-21	1.03	c	Yes	Yes	No	No	Grade 2	3	0	Grade 0	0	0	0	0	0	0	0	0	0	C	Best	M	No
Cavalier King Charles Spaniel	Female	Blenheim	2014-04-28	2013-04-20	1.02	c	Yes	Good	No	No	Grade 2	3	0	Grade 0	2	0	0	0	0	0	0	0	0	C	Best	M	No
Cavalier King Charles Spaniel	female (*)	Blenheim (*)	2009-08-25	2007-02-14	2.53	c	Unknown		Unknown	Unknown	Grade 2	3	2	Grade 2	5	1	0	1:C2-C6	3.7	0	0	3	1	D	Best		No
Cavalier King Charles Spaniel	female (*)	Blenheim (*)	2011-10-07	2008-06-02	3.35	b	Unknown		Unknown	Unknown	Grade 2	3	0	Grade 0	1	0	0	0	0	0	0	0	0	A	Best		No
Cavalier King Charles Spaniel	Female	Black and Tan	2013-12-11	2012-12-10	1	c	Yes	Good	No	No	Grade 2	3	0	Grade 0	1	0	0	0	0	0	2	0	0	C	Best	P	Yes	2
Cavalier King Charles Spaniel	Female	Black and Tan	2015-06-24	2012-12-10	2.54	c	Yes	Yes	No	No	Grade 2	2	0	Grade 1	2	0	0	2:C2-C5	0.6	0	2	0	1	A	Best	M	Yes	2
Cavalier King Charles Spaniel	male (*)	Ruby (*)	2007-06-30	2004-03-10	3.31	b	Unknown		Unknown	Unknown	Grade 2	4	0	Grade 0	0	0	0	0	0	0	1	1	1	A	Meppel		No
Cavalier King Charles Spaniel	male (*)		2011-05-11	2004-11-01	6.53	a	Unknown		Unknown	Unknown	Grade 2	3	0	Grade 0	1	0	0	0	0	0	0	0	0	A	Best		No
Cavalier King Charles Spaniel	female (*)	Black and tan (*)	2011-08-25	2006-02-01	5.57	a	Unknown		Unknown	Unknown	Grade 2	3	0	Grade 1	3	0	0	2:C2-C5	0.5	0	0	0	0	A	Best		No
Cavalier King Charles Spaniel	female (*)	Black and tan (*)	2011-08-25	2008-06-27	3.16	b	Unknown		Unknown	Unknown	Grade 2	3	0	Grade 2	4	1	0	1:C2-C3	2.1	0	2	2	1	D	Best		No
Cavalier King Charles Spaniel	male (*)		2011-03-16	2008-06-27	2.72	c	Unknown		Unknown	Unknown	Grade 1	1	0	Grade 0	0	0	0	0	0	0	0	0	1	A	Best		No
Cavalier King Charles Spaniel	Female	Blenheim	2015-02-03	2013-04-18	1.79	c	Yes	Yes	No	No	Grade 2	2	2	Grade 0	2	0	0	0	0	0	0	0	1.5	C	Best	M	No
Cavalier King Charles Spaniel	Female	Blenheim	2010-12-27	2009-12-25	1.01	c	Unknown		No	Unknown	Grade 2	3	0	Grade 0	0	0	0	0	0	0	0	0	1	C	Best		Yes	2
Cavalier King Charles Spaniel	Female	Blenheim	2012-06-26	2009-12-25	2.5	c	yes	Good	No	No info provided	Grade 2	3	0	Grade 0	1	0	0	0	0	1	0	0	1	A	Best	L	Yes	2
Cavalier King Charles Spaniel	Female	Tricolour	2012-06-26	2011-05-30	1.07	c	yes	Good	No	No info provided	Grade 2	3	0	Grade 0	1	0	0	0	0	0	0	0	1	C	Best	L	Yes	2
Cavalier King Charles Spaniel	Female	Tricolour	2014-01-07	2011-05-30	2.6	c	Yes	Good	Present	No	Grade 2	2	1	Grade 0	1	0	0	0	0	0	0	0	1	A	Best	P	Yes	2
Cavalier King Charles Spaniel	Male	Blenheim	2012-06-26	2011-06-05	1.06	c	yes	Good	No	No info provided	Grade 2	3	0	Grade 0	1	0	0	0	0	0	0	0	1	C	Best	L	Yes	2
Cavalier King Charles Spaniel	Male	Blenheim	2014-01-07	2011-06-05	2.59	c	Yes	Good	No	No	Grade 2	2	0	Grade 0	0	0	0	2:C2-C5	0	0	0	0	0	A	Best	P	Yes	2
Cavalier King Charles Spaniel	Female	Blenheim	2014-06-10	2012-01-04	2.43	c	Yes	Good	No	No	Grade 2	3	0	Grade 0	1	0	0	2:C1-C5	0	0	1	1	0	C	Best	M	Yes	2
Cavalier King Charles Spaniel	Female	Blenheim	2014-07-09	2012-01-04	2.51	c	Yes	Good	No	No	Grade 2	3	0	Grade 0	1	0	0	2:C2-C6	0	0	0	1	1	A	Best	M	Yes	2
Cavalier King Charles Spaniel	female (*)	Blenheim (*)	2010-05-27	2009-02-13	1.29	c	Unknown		Unknown	Unknown	Grade 2	3	0	Grade 0	0	0	0	0	0	0	0	0	0	C	Best		No
Cavalier King Charles Spaniel	Female	Tricolour	2015-03-13	2013-11-18	1.32	c	Yes	Yes	No	No	Grade 2	2	0	Grade 0	2	0	0	2:C2-C4	0	0	0	0	1	C	Best	M	No
Cavalier King Charles Spaniel	Female	Blenheim	2014-08-19	2013-01-09	1.61	c	Yes	Good	No	No	Grade 2	3	2	Grade 1	3	0	0	2:C2-C3	1	0	0	0	1	C	Best	M	Yes	2
Cavalier King Charles Spaniel	Female	Blenheim	2015-07-09	2013-01-09	2.5	c	Yes	Yes	No	No	Grade 2	3	0	Grade 0	2	0	0	2:C2-C4	0	0	0	0	1	A	Best	M	Yes	2
Cavalier King Charles Spaniel			2008-09-04	2007-03-16	1.47	c	Unknown		Unknown	Unknown	Grade 2	2	0	Grade 0	1	0	0	0	0	0	0	0	1	C	Best		Yes	2
Cavalier King Charles Spaniel			2009-11-13	2007-03-16	2.66	c	Unknown		Unknown	Unknown	Grade 2	2	0	Grade 0	1	0	0	0	0	0	0	0	1	A	Best		Yes	2
Cavalier King Charles Spaniel	male (*)	Blenheim (*)	2010-06-21	2007-12-13	2.52	c	Unknown		Unknown	Unknown	Grade 2	2	0	Grade 0	0	0	0	0	0	0	0	0	1	A	Best		No
Cavalier King Charles Spaniel	Female	Ruby	2015-05-12	2013-07-31	1.78	c	Yes	Yes	No	No	Grade 2	3	0	Grade 1	3	0	2	2:C2-C3 (presyrinx?)	1	0	0	0	1.5	C	Best	M	No
Cavalier King Charles Spaniel	Female	Blenheim	2012-04-17	2007-12-29	4.3	b	yes	Good	No	No info provided	Grade 2	3	0	Grade 1	3	0	0	2:C2-C4	1.4	0	0	2	0	A	Best	P	No
Cavalier King Charles Spaniel	Female	Black and Tan	2014-05-05	2011-10-27	2.52	c	Yes	Good	No	No	Grade 2	3	0	Grade 1	1	1	0	1:C2-C3	1.7	0	0	0	1	A	Best	M	No
Cavalier King Charles Spaniel	female (*)	Blenheim (*)	2010-11-29	2009-05-08	1.56	c	Unknown		Unknown	Unknown	Grade 2	3	0	Grade 0	0	0	0	2:C3-C4	0	0	0	3	2	C	Best		No
Cavalier King Charles Spaniel	Female	Ruby	2013-01-16	2009-03-03	3.87	b	Yes	Yes	No	Onbekend	Grade 2	3	0	Grade 2	6	1	0	1:C3	4.8	0	0	0	1	D	Best	P	No
Cavalier King Charles Spaniel	Male	Blenheim	2014-09-24	2013-05-20	1.34	c	Yes	Good	No	No	Grade 2	3	0	Grade 1	3	0	1	2:C3	1	0	0	0	1	C	Best	P	No
Cavalier King Charles Spaniel	male (*)	Blenheim (*)	2010-12-28	2009-12-25	1.01	c	Unknown		Unknown	Unknown	Grade 2	2	0	Grade 0	1	0	0	2:C2-C6	0	0	0	0	0	C	Best		No
Cavalier King Charles Spaniel			2009-08-07	2008-12-18	0.64	c	Unknown		Unknown	Unknown	Grade 2	3	0	Grade 0	1	0	0	2:C2-C5	0	0	0	0	1	C	Best		Yes	2
Cavalier King Charles Spaniel			2011-06-24	2008-12-18	2.52	c	Unknown		Unknown	Unknown	Grade 2	3	0	Grade 0	1	0	0	2:C2-C6	0	0	0	0	1	A	Best		Yes	2
Cavalier King Charles Spaniel	Female	Ruby	2011-10-21	2010-07-06	1.29	c	Yes	Good	no	No info provided	Grade 2	2	0	Grade 0	1	0	0	2:C2-C6	0	0	0	0	1.5	C	Best		Yes	2
Cavalier King Charles Spaniel	Female	Ruby	2013-01-18	2010-07-06	2.53	c	Yes	Yes	No	Onbekend	Grade 1	1	0	Grade 0	1	0	0	2:C2-C4	0	0	0	0	1	A	Best	M	Yes	2
Cavalier King Charles Spaniel			2010-07-09	2004-09-12	5.83	a	Unknown		Unknown	Unknown	Grade 2	3	0	Grade 2	4	1	0	1:C2-C4	3	0	0	0	1	D	Best		No
Cavalier King Charles Spaniel	Female	Blenheim	2013-12-27	2012-02-08	1.89	c	Yes	Good	No	No	Grade 2	3	0	Grade 0	1	1	0	1:C3-C6	0	0	0	0	1	C	Best	P	Yes	2
Cavalier King Charles Spaniel	Female	Blenheim	2014-10-15	2012-02-08	2.69	c	Yes	Good	No	No	Grade 2	2	0	Grade 0	2	0	0	2:C2-C4	0	0	0	0	2	A	Best	M	Yes	2
Cavalier King Charles Spaniel	Female	Ruby	2012-01-27	2010-10-11	1.29	c	ja	Goed	no	Geen informatie vermeld	Grade 2	3	0	Grade 0	2	0	0	2:C2-C6	0	3	0	0	1.5	C	Best	N	Yes	2
Cavalier King Charles Spaniel	Female	Ruby	2013-09-19	2010-10-11	2.94	c	Yes	Good	No	No	Grade 2	3	0	Grade 1	3	1	3	1:C2-C3	1.6	1	0	0	0	A	Best	M	Yes	2
Cavalier King Charles Spaniel	female (*)	Tricolor (*)	2011-09-08	2007-02-11	4.58	b	Unknown		Unknown	Unknown	Grade 2	3	0	Grade 2	4	1	3	1:C2-C3	2.2	0	0	0	1	D	Best		No
Cavalier King Charles Spaniel	Female	Tricolour	2013-03-08	2012-01-13	1.15	c	Yes	Yes	No	Onbekend	Grade 2	2	0	Grade 0	1	0	0	2:C2-C4	0	1	0	0	1	C	Best	M	No
Cavalier King Charles Spaniel			2008-04-24	2000-04-08	8.04	a	Unknown		Unknown	Unknown	Grade 2	3	0	Grade 1	2	0	0	2:C2-C5	0.8	0	0	0	1	A	Best		No
Cavalier King Charles Spaniel	female (*)	Tricolor (*)	2010-11-01	2007-11-28	2.93	c	Unknown		Unknown	Unknown	Grade 2	3	0	Grade 2	4	1	0	1:C3	2.2	0	2	3	1	D	Best		No
Cavalier King Charles Spaniel	female (*)	Blenheim (*)	2010-11-16	2008-02-08	2.77	c	Unknown		Unknown	Unknown	Grade 2	3	0	Grade 0	0	0	0	0	0	0	0	0	1	A	Best		No
Cavalier King Charles Spaniel	Female	Blenheim	2015-08-20	2014-02-20	1.5	c	Yes	Yes	No	Unknown	Grade 2	3	0	Grade 0	1	0	0	0	0	0	0	0	0	C	Orion	M	No
Cavalier King Charles Spaniel	Female	Black and Tan	2015-08-27	2014-01-26	1.59	c	Yes	Yes	No	Unknown	Grade 2	3	0	Grade 0	2	0	0	2:C1-C6	0	0	1	0	1	C	Best	M	No
Cavalier King Charles Spaniel	Female	Black and Tan	2011-10-21	2010-05-14	1.44	c	Yes	Good	no	No info provided	Grade 2	3	0	Grade 0	1	0	0	0	0	0	0	0	1	C	Best		Yes	2
Cavalier King Charles Spaniel	Female	Black and Tan	2013-06-14	2010-05-14	3.08	b	Yes	Goed	No	Geen	Grade 2	2	0	Grade 0	1	0	0	2:C2-C5	0	0	0	0	0	A	Best	L	Yes	2
Cavalier King Charles Spaniel	Female	Blenheim	2015-12-21	2013-05-22	2.58	c	Yes	Yes	no	Unknown	Grade 2	3	0	Grade 1	3	1	0	1:C2-C3	1.8	3	0	0	1.5	A	Best	M	No
Cavalier King Charles Spaniel	Male	Blenheim	2015-04-30	2012-10-24	2.52	c	Yes	Yes	No	No	Grade 2	3	1	Grade 0	0	0	0	0	0	0	0	0	0	A	Best	M	No
Cavalier King Charles Spaniel	Female	Blenheim	2014-10-27	2012-03-20	2.6	c	Yes	Yes	No	No	Grade 2	3	0	Grade 0*	2	0	0	2:C1-C2	0	0	0	0	0	A	Best	M	No
Cavalier King Charles Spaniel	Female	Black and Tan	2015-05-18	2012-10-24	2.57	c	Yes	Yes	No	No	Grade 2	3	0	Grade 1	3	1	2	1:C1-C2	1.5	0	2	0	1.5	A	Best	M	No
Cavalier King Charles Spaniel	Male	Blenheim	2013-10-25	2012-10-24	1	c	Yes	Good	no	No	Grade 2	3	1	Grade 0	1	0	0	2:C3-C4	0	0	3	3	1	C	Best	M	No
Cavalier King Charles Spaniel			2009-07-16	2003-06-13	6.09	a	Unknown		Unknown	Unknown	Grade 2	3	0	Grade 1	3	1	0	1:C3	1.8	0	0	2	1	A	Best		No
Cavalier King Charles Spaniel	Female	Blenheim	2015-10-08	2011-09-16	4.06	b	Yes	Yes	No	Unknown	Grade 2	3	0	Grade 2	6	1	0	1:C2-T1	5	0	0	0	0	D	Orion	M	No
Cavalier King Charles Spaniel	Male	Black and Tan	2012-01-06	2011-01-05	1	c	Ja	Kan beter	No	Niet ingevuld	Grade 2	3	0	Grade 1	2	0	0	2:C2-C5	0.8	0	0	0	0	C	Best	Paul	Yes	2
Cavalier King Charles Spaniel	Male	Black and Tan	2013-07-25	2011-01-05	2.56	c	Yes	Good	No	No	Grade 2	2	1	Grade 1	3	1	0	1:C3	1.5	0	1	2	0	A	Best	M	Yes	2
Cavalier King Charles Spaniel	Female	Black and Tan	2014-01-31	2010-01-14	4.05	b	Yes	Good	No	No	Grade 2	2	0	Grade 0	2	0	0	2:C2-C4	0	0	0	0	1	A	Best	P	No
Cavalier King Charles Spaniel	Female	Blenheim	2014-11-14	2013-05-22	1.48	c	Yes	Good	No	No	Grade 2	2	1	Grade 0	2	0	0	2:C3-C4	0	0	0	0	1	C	Best	M	No
Cavalier King Charles Spaniel	female (*)	Blenheim (*)	2011-06-10	2009-11-17	1.56	c	Unknown		Unknown	Unknown	Grade 2	3	0	Grade 1	3	1	3	1:C2-C3	1.9	0	0	0	1	C	Best		No
Cavalier King Charles Spaniel	Female	Tricolour	2015-12-21	2010-06-18	5.51	a	Yes	Yes	no	Unknown	Grade 2	3	0	Grade 2	4	1	0	1:C3	2	0	0	3	1	D	Best	M	No
Cavalier King Charles Spaniel	female (*)	Tricolor (*)	2011-07-08	2010-03-20	1.3	c	Unknown		Unknown	Unknown	Grade 2	3	0	Grade 2	4	1	0	1:C2	2.9	1	0	0	1	E	Dordrecht		No
Cavalier King Charles Spaniel	female (*)	Tricolor (*)	2010-11-19	2009-06-23	1.41	c	Unknown		Unknown	Unknown	Grade 2	2	0	Grade 1	3	0	0	2:C2-C3	1.2	0	0	0	1.5	A	Best		No
Cavalier King Charles Spaniel	male (*)	Tricolor (*)	2011-09-29	2004-12-18	6.78	a	Unknown		Unknown	Unknown	Grade 2	3	0	Grade 1	3	1	0	1:C2-C5	1.4	0	0	0	1	A	Dordrecht		No
Cavalier King Charles Spaniel	female (*)	Black and tan (*)	2011-07-05	2006-08-25	4.86	b	Unknown		Unknown	Unknown	Grade 2	2	0	Grade 2	6	1	3	1:C2-C5	6.2	0	0	0	1	D	Best		No
Cavalier King Charles Spaniel	female (*)	Blenheim (*)	2011-07-25	2005-09-06	5.89	a	Unknown		Unknown	Unknown	Grade 2	2	0	Grade 1	3	1	0	1:C3	1.2	3	3	0	1	A	Best		No
Cavalier King Charles Spaniel	Female	Blenheim	2015-02-20	2012-08-12	2.52	c	Yes	Yes	No	No	Grade 2	2	0	Grade 0	0	0	0	0	0	0	0	0	1	A	Best	M	No
Cavalier King Charles Spaniel	male (*)	Black and tan (*)	2011-03-29	2008-06-12	2.8	c	Unknown		Unknown	Unknown	Grade 2	3	0	Grade 0	1	0	0	2:C2-C6	0	0	0	0	1	A	Best		No
Cavalier King Charles Spaniel	Male	-	2011-11-24	2009-05-10	2.54	c	Not verified - not displayed on the scan	Yes	Unknown	-	Grade 2	2	0	Grade 1	3	0	0	2:C2-C4	1	0	0	0	1	A	Utrecht	Paul	No
Cavalier King Charles Spaniel	Male	Tricolour	2013-03-07	2012-03-06	1	c	Yes	Yes	No	Onbekend	Grade 2	2	0	Grade 0	1	0	0	2:C2-C4	0	0	0	0	0	C	Best	M	No
Cavalier King Charles Spaniel	female (*)	Tricolor (*)	2008-01-26	2005-01-25	3	b	Unknown		Unknown	Unknown	Grade 2	3	0	Grade 0	1	0	0	0	0	0	0	3	1	A	Meppel		No
Cavalier King Charles Spaniel	female	tricolour	2011-12-19	2009-06-03	2.54	c	Yes	yes	No	No info provided	Grade 2	3	0	Grade 0	1	0	0	0	0	0	0	0	1	A	Best		No
Cavalier King Charles Spaniel	Male	Blenheim	2012-07-03	2010-05-18	2.13	c	yes	Good	No	No info provided	Grade 2	3	0	Grade 0	2	0	0	2:C2-C6	0	0	0	0	1	C	Best	L	No
Cavalier King Charles Spaniel	Female	Blenheim	2015-11-25	2014-08-05	1.31	c	Yes	Yes	no	Unknown	Grade 2	3	0	Grade 0	2	0	0	2:C2-C4	0	0	0	0	1	C	Best	M	No
Cavalier King Charles Spaniel	Male	Blenheim	2009-01-27	2008-05-28	0.66	c	Unknown		No	Unknown	Grade 1	1	0	Grade 0	0	0	0	0	0	0	0	0	0	C	Best		Yes	3
Cavalier King Charles Spaniel	Male	Blenheim	2010-11-30	2008-05-28	2.51	c	Unknown		No	Unknown	Grade 2	2	0	Grade 0	0	0	0	0	0	0	0	0	0	A	Best		Yes	3
Cavalier King Charles Spaniel	Male	Blenheim	2013-05-29	2008-05-28	5	a	Yes	Goed	No	Geen	Grade 2	3	0	Grade 0	1	0	0	0	0	0	0	0	1	A	Best	P	Yes	3
Cavalier King Charles Spaniel	Female	Ruby	2012-11-19	2009-05-03	3.54	b	Yes	Yes	No	Onbekend	Grade 2	3	0	Grade 2	5	1	0	1:C2-C3	3	0	2	2	1	D	Best	P	No
Cavalier King Charles Spaniel	Female	Black and Tan	2015-10-29	2012-11-24	2.93	b	Yes	Yes	No	Unknown	Grade 2	3	0	Grade 1	3	1	0	1:C3	1.2	0	0	0	1	A	Drachten	M	No
Cavalier King Charles Spaniel	Female	Blenheim	2008-09-24	2006-06-01	2.31	c	Unknown		no	Unknown	Grade 2	3	0	Grade 0	2	0	0	0	0	0	0	0	1	C	Best		Yes	2
Cavalier King Charles Spaniel	Female	Blenheim	2010-08-27	2006-06-01	4.24	b	Yes	Good	No	No info provided	Grade 2	3	0	Grade 1	3	1	0	1:C3-C4	1.6	0	0	0	1	A	Best	L	Yes	2
Cavalier King Charles Spaniel	Female	Black and Tan	2014-08-20	2011-10-26	2.82	c	Yes	Good	No	No	Grade 2	3	0	Grade 0	1	0	0	2:C3-C4	0	0	0	0	1	A	Best	M	No
Cavalier King Charles Spaniel	Female	Blenheim	2013-01-18	2011-09-30	1.3	c	Yes	Yes	No	Onbekend	Grade 2	2	0	Grade 0	1	0	0	2:C2-C5	0	0	0	0	0	C	Best	M	Yes	2
Cavalier King Charles Spaniel	Female	Blenheim	2014-04-15	2011-09-30	2.54	c	Yes	Good	No	No	Grade 2	2	0	Grade 0	2	0	0	2:C2-C4	0	0	0	3	0	A	Best	M	Yes	2
Cavalier King Charles Spaniel	Male	Blenheim	2011-12-22	2010-10-04	1.22	c	Yes	Good	No	No info provided	Grade 2	3	0	Grade 0	1	0	0	2:C2-C6	0	0	0	0	1	C	Dordrecht	Stefanie	Yes	2
Cavalier King Charles Spaniel	Male	Blenheim	2013-04-08	2010-10-04	2.51	c	Yes	Goed	no	Geen	Grade 2	2	0	Grade 1	3	1	0	1:C2-C3	1.3	0	0	0	0	A	Best	P	Yes	2
Cavalier King Charles Spaniel	female (*)	Tricolor (*)	2008-01-26	2005-07-11	2.54	c	Unknown		Unknown	Unknown	Grade 2	3	0	Grade 0	2	0	0	0	0	0	0	0	1	A	Meppel		No
Cavalier King Charles Spaniel	female (*)	Blenheim (*)	2011-09-16	2009-03-15	2.5	c	Unknown		Unknown	Unknown	Grade 2	3	0	Grade 0	0	0	0	0	0	0	0	0	1	A	Best		No
Cavalier King Charles Spaniel	Female	Tricolour	2013-02-18	2012-01-29	1.05	c	Yes	Yes	No	Onbekend	Grade 2	2	0	Grade 0	1	0	0	2:C2-C4	0	0	0	3	0	C	Best	P	Yes	2
Cavalier King Charles Spaniel	Female	Tricolour	2014-10-14	2012-01-29	2.71	c	Yes	Good	No	No	Grade 2	3	0	Grade 0	2	0	0	2:C2-C3	0	0	1	1	0	A	Best	M	Yes	2
Cavalier King Charles Spaniel	Female	Tricolour	2012-04-17	2009-09-20	2.58	c	yes	Good	No	No info provided	Grade 2	2	0	Grade 0	1	0	0	0	0	0	0	0	0	A	Best	P	No
Cavalier King Charles Spaniel	male (*)	Ruby (*)	2009-09-30	2006-06-07	3.31	b	Unknown		Unknown	Unknown	Grade 2	2	0	Grade 1	3	1	0	1:C3	0.9	0	1	2	1	A	Best		No
Cavalier King Charles Spaniel	Male	Blenheim	2014-08-19	2013-07-02	1.13	c	Yes	Good	No	No	Grade 2	3	0	Grade 0	1	0	0	2:C2-C4	0	0	0	0	1	C	Best	M	No
Cavalier King Charles Spaniel	Female	Tricolour	2013-10-31	2011-08-17	2.21	c	Yes	Good	no	No	Grade 2	3	0	Grade 1	2	0	3	2:C2-C4	0.8	0	3	3	1	C	Best	M	No
Cavalier King Charles Spaniel	male	Black and Tan	2012-01-06	2006-06-25	5.53	a	yes	Poor	No	not filled in	Grade 2	3	0	Grade 2	6	1	0	1:C2-C4	5	0	0	0	0	D	Best		No
Cavalier King Charles Spaniel	Female	Black and Tan	2013-05-23	2010-03-31	3.15	b	Yes	Goed	No	Geen	Grade 2	2	0	Grade 0	1	0	0	0	0	0	0	0	1	A	Best	P	No
Cavalier King Charles Spaniel			2008-04-28	2006-02-09	2.22	c	Unknown		Unknown	Unknown	Grade 2	3	0	Grade 2	5	1	0	1:C2-C4	3.3	0	0	0	1	E	Best		No
Cavalier King Charles Spaniel			2008-04-28	2003-08-02	4.74	b	Unknown		Unknown	Unknown	Grade 2	3	0	Grade 2	6	1	0	1:C2-C4	5.3	0	0	0	1	D	Best		No
Cavalier King Charles Spaniel	female (*)	Tricolor (*)	2009-06-12	2008-08-01	0.86	c	Unknown		Unknown	Unknown	Grade 2	3	0	Grade 0	0	0	0	0	0	0	0	0	1	C	Best		Yes	2
Cavalier King Charles Spaniel	female (*)	Tricolor (*)	2011-02-24	2008-08-01	2.56	c	Unknown		Unknown	Unknown	Grade 2	3	0	Grade 1	2	0	0	0	0.5	0	3	3	1	A	Best		Yes	2
Cavalier King Charles Spaniel	Female	Black and Tan	2015-07-06	2014-01-27	1.44	c	Yes	Yes	No	No	Grade 2	3	1	Grade 0	2	0	0	2:C2-C4	0	0	0	0	0	C	Best	M	No
Cavalier King Charles Spaniel	female (*)	Tricolor (*)	2009-06-12	2008-08-01	0.86	c	Unknown		Unknown	Unknown	Grade 2	3	0	Grade 0	1	0	0	2:C2-C6	0	0	0	0	1	C	Best		No
Cavalier King Charles Spaniel	Female	Ruby	2014-01-31	2011-10-08	2.31	c	Yes	Good	No	No	Grade 2	3	0	Grade 0	2	0	0	2:C2	0	0	0	0	1	C	Best	P	No
Cavalier King Charles Spaniel	male (*)	Blenheim (*)	2009-02-24	2004-02-07	5.05	a	Unknown		Unknown	Unknown	Grade 2	3	0	Grade 2	5	1	0	1:C2-C4	3.3	0	2	2	1	D	Best		No
Cavalier King Charles Spaniel	Male	Blenheim	2014-06-12	2012-08-01	1.86	c	Yes	Good	No	No	Grade 2	3	0	Grade 0	1	0	0	2:C1-C4	0	0	3	3	0	C	Best	M	No
Cavalier King Charles Spaniel	female (*)	Blenheim (*)	2011-10-07	2008-11-15	2.89	c	Unknown		Unknown	Unknown	Grade 2	3	0	Grade 0	1	0	0	0	0	0	3	3	1	A	Best		No
Cavalier King Charles Spaniel	Male	Tricolour	2012-10-01	2010-10-27	1.93	c	yes	Good	No	No info provided	Grade 2	3	0	Grade 0	2	0	0	2:C2-C6	0	0	0	0	0	C	Best	D	Yes	2
Cavalier King Charles Spaniel	Male	Tricolour	2013-05-30	2010-11-27	2.51	c	Yes	Goed	No	Geen	Grade 2	2	0	Grade 0	1	0	0	0	0	1	0	0	1	A	Best	P	Yes	2
Cavalier King Charles Spaniel	female (*)	Tricolor (*)	2011-05-10	2007-02-11	4.25	b	Unknown		Unknown	Unknown	Grade 2	3	0	Grade 0	1	0	0	0	0	0	0	0	1	A	Best		No
Cavalier King Charles Spaniel	teef	Tricolour	2012-02-07	2009-04-23	2.79	c	ja	Goed	No	Geen info vermeld	Grade 2	3	0	Grade 0	2	0	0	2:C2-C6	0	0	0	0	0	A	Best	L	No
Cavalier King Charles Spaniel	male (*)	Black and tan (*)	2007-06-30	2004-10-26	2.68	c	Unknown		Unknown	Unknown	Grade 2	3	0	Grade 0	0	0	0	0	0	0	0	0	0	A	Meppel		No
Cavalier King Charles Spaniel	male (*)	Ruby (*)	2009-11-25	2008-06-08	1.46	c	Unknown		Unknown	Unknown	Grade 2	3	0	Grade 0	0	0	0	0	0	0	0	0	1	C	Best		No
Cavalier King Charles Spaniel	female (*)	Ruby (*)	2009-01-21	2003-12-31	5.06	a	Unknown		Unknown	Unknown	Grade 2	2	0	Grade 0	1	0	0	2:C2-C6	0	0	3	3	1	A	Best		No
Cavalier King Charles Spaniel			2011-01-17	2006-09-26	4.31	b	Unknown		Unknown	Unknown	Grade 2	3	0	Grade 0	1	0	0	0	0	0	0	0	1	A	Best		No
Cavalier King Charles Spaniel	Female	Blenheim	2015-12-16	2014-12-08	1.02	c	Yes	Yes	no	Unknown	Grade 2	3	0	Grade 0	1	0	0	2:C2-C6	0	0	0	0	0	C	Best	M	No
Cavalier King Charles Spaniel	Female	Black and Tan	2014-04-18	2011-12-17	2.34	c	Yes	No	No	No	Grade 2	3	0	Grade 0 or 1	2	0	0	2:C2-C4	<1	0	0	0	3 (the artefact makes it impossible to see section C2 to C3)	C	Best	M	No
Cavalier King Charles Spaniel	Male	Blenheim	2014-09-17	2013-07-24	1.15	c	Yes	Good	No	No	Grade 2	3	0	Grade 0	1	0	0	2:C1-C6	0	0	0	0	0	C	Best	P	No
Cavalier King Charles Spaniel	female (*)		2004-11-20	1998-12-21	5.91	a	Unknown		Unknown	Unknown	Grade 2	3	0	Grade 2	6	1	0	1:C2-T5	4.5	0	3	3	1	D	Meppel		No
Cavalier King Charles Spaniel	male (*)		2004-09-18	1999-03-20	5.49	a	Unknown		Unknown	Unknown	Grade 2	3	0	Grade 2	6	1	0	1:C2-T4	5.6	0	3	3	1	D	Meppel		No
Cavalier King Charles Spaniel	male (*)	Tricolor (*)	2009-01-27	2003-07-10	5.55	a	Unknown		Unknown	Unknown	Grade 2	3	0	Grade 0	1	0	0	2:C2-C5	0	0	0	0	1	A	Best		No
Cavalier King Charles Spaniel	Male	Black and Tan	2015-06-19	2014-06-15	1.01	c	Yes	Yes	No	No	Grade 2	3	2	Grade 0	1	0	0	2:C2-C5	0	0	0	0	0	C	Best	M	No
Cavalier King Charles Spaniel	Male	Ruby	2013-05-17	2006-07-11	6.85	a	Yes	Goed	No	Geen	Grade 2	2	0	Grade 2	5	1	0	1:C1-C3	3	0	0	0	0	D	Best	P	Yes	2
Cavalier King Charles Spaniel	Male	Ruby	2010-12-06	2006-07-11	4.4	b	Unknown		No	Unknown	Grade 2	3	0	Grade 1	3	1	0	1:C3	1.5	0	0	0	1	A	Best		Yes	2
Cavalier King Charles Spaniel	Female	Ruby	2011-11-14	2008-10-05	3.11	b	Yes	Good	no	No info provided	Grade 2	3	0	Grade 1	3	0	0	2:C2-C5	0.5	0	0	0	1	A	Best		No
Cavalier King Charles Spaniel	Female	Tricolor	2011-12-08	2009-06-07	2.5	c	Yes	Good	no	No info provided	Grade 2	3	0	Grade 0	1	0	0	2:C2-C6	0	0	0	2	1	A	Best	Stefanie	No
Cavalier King Charles Spaniel	male (*)	Blenheim (*)	2010-06-24	2009-08-07	0.88	a	Unknown		Unknown	Unknown	Grade 2	3	0	Grade 0	0	0	0	0	0	0	0	0	1	C	Best		No
Cavalier King Charles Spaniel	Female	Blenheim	2011-11-14	2010-09-17	1.16	c	Yes	Good	no	No info provided	Grade 2	3	0	Grade 0	0	0	0	0	0	0	0	0	1	C	Best		No
Cavalier King Charles Spaniel	Male	Blenheim	2011-12-28	2010-09-06	1.31	c	Yes	yes	No	No info provided	Grade 2	3	0	Grade 0	1	0	0	2:C2-C5	0	0	0	1	1	C	Best	Stefanie	No
Cavalier King Charles Spaniel	Male	Black and Tan	2014-04-29	2013-04-25	1.01	c	Yes	Good	No	No	Grade 2	3	0	Grade 0	1	0	0	2:C2-C3	0	2	0	0	1	C	Best	M	Yes	2
Cavalier King Charles Spaniel	Male	Black and Tan	2015-10-26	2013-04-25	2.5	c	Yes	Yes	No	Unknown	Grade 2	3	0	Grade 0	2	0	0	2:C2-C4	0	2	0	0	1.5	A	Best	M	Yes	2
Cavalier King Charles Spaniel	Female	Ruby	2012-08-17	2006-06-07	6.19	a	yes	Good	No	No info provided	Grade 2	3	0	Grade 1	3	1	0	1:C2-C6	1.5	0	0	1	0	A	Best	M	No
Cavalier King Charles Spaniel	Female	Black and Tan	2014-04-29	2013-04-25	1.01	c	Yes	Good	No	No	Grade 2	3	5: incorrect positioning	Grade 0	1	0	0	2:C1-C5	0	2	0	0	0	C	Best	M	No
Cavalier King Charles Spaniel	Female	Blenheim	2011-07-25	2010-05-30	1.15	c	Unknown		No	Unknown	Grade 2	3	0	Grade 1	3	0	0	2:C2-C5	0.5	0	0	0	1	A	Best		Yes	2
Cavalier King Charles Spaniel	Female	Blenheim	2013-09-17	2010-05-30	3.3	b	Yes	Good	No	No	Grade 2	2	0	Grade 2	4	1	0	1:C1-C4	2.8	0	1	1	0	D	Orion	M	Yes	2
Cavalier King Charles Spaniel	Male	Blenheim	2014-05-01	2013-03-09	1.14	c	Yes	Good	No	No	Grade 2	2	5	Grade 0	1	0	0	2:C3-C4	0	0	0	0	0	C	Best	M	Yes	2
Cavalier King Charles Spaniel	Male	Blenheim	2015-09-29	2013-03-09	2.56	c	Yes	Yes	No	Unknown	Grade 2	3	0	Grade 0	2	0	0	2:C2-C3	0	0	0	0	0	A	Best	M	Yes	2
Cavalier King Charles Spaniel	Female	Blenheim	2014-07-01	2011-05-01	3.17	b	Yes	Good	No	No	Grade 2	2	0	Grade 1	3	0	0	2:C2-C3	1	0	1	0	0	A	Best	M	No
Cavalier King Charles Spaniel	female (*)	Blenheim (*)	2009-08-25	2007-08-30	1.99	c	Unknown		Unknown	Unknown	Grade 2	3	0	Grade 1	3	1	0	1:C3	1.5	0	1	1	1	C	Best		Yes	3
Cavalier King Charles Spaniel	female (*)	Blenheim (*)	2010-08-11	2007-08-30	2.95	c	Unknown		Unknown	Unknown	Grade 2	3	0	Grade 2	4	1	0	1:C2-C3	2.3	0	2	2	1	D	Best		Yes	3
Cavalier King Charles Spaniel	female (*)	Blenheim (*)	2011-03-22	2007-08-30	3.56	b	Unknown		Unknown	Unknown	Grade 2	3	0	Grade 2	4	1	0	1:C2-C3	2.3	0	2	2	1	D	Best		Yes	3
Cavalier King Charles Spaniel	female (*)	Blenheim (*)	2011-08-02	2009-05-09	2.23	c	Unknown		Unknown	Unknown	Grade 2	3	0	Grade 0	1	0	0	2:C2-C5	0	0	0	0	1	C	Best		No
Cavalier King Charles Spaniel	Male	Tricolour	2012-02-14	2010-02-11	2.01	c	ja	Goed	No	Geen informatie vermeld	Grade 2	3	0	Grade 0	2	0	0	2:C2-C6	0	0	0	0	0	C	Best	N	Yes	3
Cavalier King Charles Spaniel	Male	Tricolour	2013-02-18	2010-02-11	3.02	b	Yes	Yes	No	Onbekend	Grade 2	3	0	Grade 0	1	0	0	2:C2-C4	0	0	0	0	1	A	Best	P	Yes	3
Cavalier King Charles Spaniel	Male	Tricolour	2015-05-13	2010-02-11	5.26	a	Yes	Yes	No	No	Grade 2	2	0	Grade 0	1	0	0	0	0	0	0	3	1	A	Best	M	Yes	3
Cavalier King Charles Spaniel	Female	Tricolour	2014-11-12	2010-03-30	4.62	b	Yes	Good	No	No	Grade 2	2	0	Grade 0	2	0	0	2:C3-C6	0	0	0	0	1.5	A	Best	M	No
Cavalier King Charles Spaniel	Female	Black and Tan	2012-06-29	2009-03-11	3.3	b	yes	Good	No	No info provided	Grade 2	3	0	Grade 1	3	1	1	1:C3	1.7	1	0	0	1.5	A	Best	L	No
Cavalier King Charles Spaniel	Male	Blenheim	2011-12-19	2009-06-14	2.51	c	Yes	Good	No	No info provided	Grade 2	3	0	Grade 0	1	0	0	2:C2-C4	0	0	0	2	1	A	Best	Stefanie	No
Cavalier King Charles Spaniel	female (*)	Tricolor (*)	2007-06-30	2004-04-24	3.18	b	Unknown		Unknown	Unknown	Grade 2	3	0	Grade 1	2	0	1	2:C2-C6	0.5	0	0	0	1	A	Meppel		No
Cavalier King Charles Spaniel	female (*)	Tricolor (*)	2004-09-18	2004-04-24	0.4	c	Unknown		Unknown	Unknown	Grade 2	3	0	Grade 0	1	0	0	2:C2-C6	0	0	0	0	1	C	Meppel		No
Cavalier King Charles Spaniel	male (*)	Tricolor (*)	2008-06-03	2007-10-05	0.66	c	Unknown		Unknown	Unknown	Grade 2	3	0	Grade 0	1	0	0	2:C2-C4	0	0	0	0	1	C	Best		No
Cavalier King Charles Spaniel	female (*)	Blenheim (*)	2008-06-30	2005-12-26	2.51	c	Unknown		Unknown	Unknown	Grade 2	2	0	Grade 0	1	0	0	0	0	0	0	0	1	A	Best		No
Cavalier King Charles Spaniel	Male	Black and Tan	2015-12-21	2013-02-13	2.86	c	Yes	Yes	no	Unknown	Grade 2	3	0	Grade 0	1	0	0	2:C2-C6	0	0	2	0	1.5	A	Best	M	No
Cavalier King Charles Spaniel	Male	Ruby	2015-12-21	2014-02-15	1.85	c	Yes	Yes	no	Unknown	Grade 2	3	0	Grade 0	1	0	0	2:C2-C6	0	0	1	1	1.5	C	Best	M	No
Cavalier King Charles Spaniel	Male	Black and Tan	2015-12-21	2014-02-15	1.85	c	Yes	Yes	no	Unknown	Grade 2	3	0	Grade 0	1	0	0	0	0	0	0	0	0	C	Best	M	No
Cavalier King Charles Spaniel	Male	Ruby	2015-12-21	2014-03-31	1.73	c	Yes	Yes	no	Unknown	Grade 2	3	0	Grade 1	3	0	0	2:C2-C6	1	0	0	0	1.5	C	Best	M	No
Cavalier King Charles Spaniel	male (*)	Ruby (*)	2011-02-11	2007-06-18	3.65	b	Unknown		Unknown	Unknown	Grade 2	3	0	Grade 0	1	0	0	2:C2-C5	0	0	0	0	1	A	Best		No
Cavalier King Charles Spaniel	male (*)	Black and tan (*)	2011-02-11	2008-07-11	2.58	c	Unknown		Unknown	Unknown	Grade 2	3	0	Grade 0	0	0	0	0	0	0	2	2	1	A	Best		No
Cavalier King Charles Spaniel	male	Black and Tan	2012-01-06	2009-04-18	2.72	c	yes	Poor	No	not filled in	Grade 2	3	0	Grade 2	4	1	0	1:C2-C5	2.7	0	2	0	0	D	Best		No
Cavalier King Charles Spaniel	Male	Black and Tan	2014-03-24	2010-10-12	3.45	b	Yes	Good	No	No	Grade 2	3	0	Grade 0	1	0	0	0	0	0	1	0	0	A	Best	M	No
Cavalier King Charles Spaniel	Male	Ruby	2014-12-02	2011-06-25	3.44	b	Yes	Yes	No	No	Grade 2	2	0	Grade 1	2	0	0	2:C2-C3	0.7	0	0	0	1.5	A	Best	M	No
Cavalier King Charles Spaniel	Female	Blenheim	2012-04-27	2011-04-27	1	c	yes	Good	No	No info provided	Grade 2	2	0	Grade 0	1	0	0	0	0	0	2	2	1	C	Best	P	Yes	2
Cavalier King Charles Spaniel	Female	Blenheim	2013-10-28	2011-04-27	2.5	c	Yes	Good	no	No	Grade 2	2	1	Grade 0	2	1	0	2:C1-C6	0	0	3	3	0	A	Best	M	Yes	2
Cavalier King Charles Spaniel	male (*)	Blenheim (*)	2008-07-25	2005-12-26	2.58	c	Unknown		Unknown	Unknown	Grade 2	3	0	Grade 1	3	1	0	1:C2-C4	1.8	0	2	1	1	A	Best		No
Cavalier King Charles Spaniel	female (*)	Blenheim (*)	2008-06-03	2005-11-25	2.52	c	Unknown		Unknown	Unknown	Grade 2	3	0	Grade 1	2	0	0	2:C2-C4	0.5	0	0	0	1	A	Best		No
Cavalier King Charles Spaniel	female (*)	Blenheim (*)	2010-05-27	2009-09-23	0.68	c	Unknown		Unknown	Unknown	Grade 2	3	0	Grade 0	0	0	0	0	0	0	0	0	1	C	Best		No
Cavalier King Charles Spaniel	female (*)	Blenheim (*)	2010-05-27	2009-09-23	0.68	c	Unknown		Unknown	Unknown	Grade 2	3	0	Grade 0	0	0	0	0	0	0	0	0	1	C	Best		No
Cavalier King Charles Spaniel	male (*)		2009-07-09	2006-01-11	3.49	b	Unknown		Unknown	Unknown	Grade 2	3	0	Grade 2	4	1	0	1:C2-C3	3	0	1	2	1	D	Best		No
Cavalier King Charles Spaniel	Female	Blenheim	2014-11-27	2013-07-02	1.4	c	Yes	Yes	No	No	Grade 2	2	2	Grade 0	1	0	0	2:C3	0	0	2	2	0	C	Best	M	No
Cavalier King Charles Spaniel	Female	Ruby	2015-10-05	2013-03-30	2.51	c	Yes	Yes	No	Unknown	Grade 2	3	0	Grade 0	2	0	0	2:C1-C6	0	0	3	3	0	A	Best	M	No
Cavalier King Charles Spaniel	Female	Blenheim	2012-03-08	2008-09-06	3.51	b	ja	Goed	No	No info provided	Grade 2	3	0	Grade 0	1	0	0	0	0	0	0	0	0	A	Utrecht	N	No
Cavalier King Charles Spaniel	Male	Tricolour	2015-08-10	2011-12-01	3.69	b	Yes	Yes	No	Unknown	Grade 2	3	0	Grade 2	5	0	2	2:C2-C4	3.5	2	3	3	1	D	Best	M	No
Cavalier King Charles Spaniel	female (*)	Blenheim (*)	2011-03-23	2007-12-06	3.3	b	Unknown		Unknown	Unknown	Grade 2	3	0	Grade 0	1	0	0	2:C2-C4	0	0	0	1	1	A	Best		No
Cavalier King Charles Spaniel	female (*)		2011-03-23	2006-10-01	4.48	b	Unknown		Unknown	Unknown	Grade 2	3	0	Grade 0	1	0	0	2:C2-C5	0	0	0	2	1.5	A	Best		No
Cavalier King Charles Spaniel	male (*)		2009-07-02	2004-06-27	5.01	a	Unknown		Unknown	Unknown	Grade 2	2	0	Grade 0	1	0	0	0	0	0	0	0	0	A	Best		No
Cavalier King Charles Spaniel	Female	Tricolour	2014-04-15	2012-12-09	1.35	c	Yes	Good	No	No	Grade 2	3	0	Grade 0	2	0	0	2:C2-C5	0	0	2	0	1	C	Best	M	No
Cavalier King Charles Spaniel	female (*)	Ruby (*)	2011-09-20	2009-03-12	2.52	c	Unknown		Unknown	Unknown	Grade 2	3	0		0		0	2:C2-C6			0	0	2		Best		No
Cavalier King Charles Spaniel	Female	Blenheim	2012-05-04	2009-02-03	3.25	b	yes	Good	No	No info provided	Grade 2	3	0	Grade 2	4	1	0	1:C2-C3	2.9	0	1	0	1	D	Best	L	No
Cavalier King Charles Spaniel	Female	Blenheim	2012-10-10	2011-05-14	1.41	c	yes	Good	No	No info provided	Grade 2	3	0	Grade 1	3	1	0	1:C2	1.7	0	0	1	1	C	Best	M	No
Cavalier King Charles Spaniel	Female	Blenheim	2013-06-27	2007-06-21	6.02	a	Yes	Artefact visible	Unknown	Geen	Grade 2	3	5	Grade 0	1	0	0	0	0	0	1	2	0	A	Dordrecht	M	No
Cavalier King Charles Spaniel	Male		2011-11-24	2011-06-19	0.43	c	Not verified - not displayed on the scan	Yes	Unknown	-	Grade 2	2	0	Grade 0	1	0	0	2:C2-C5	0	0	0	0	1	C	Utrecht	Paul	No
Cavalier King Charles Spaniel	Female	Ruby	2014-01-31	2012-04-15	1.79	c	Yes	Good	No	No	Grade 2	2	1	Grade 1	3	1	0	1:C2-C3	1.3	0	0	0	1	C	Best	P	No
Cavalier King Charles Spaniel	female (*)	Tricolor (*)	2007-06-30	2001-12-01	5.58	a	Unknown		Unknown	Unknown	Grade 2	3	0	Grade 2	5	1	0	1:C2-T3	3.7	0	0	0	1	D	Meppel		No
Cavalier King Charles Spaniel	Female	Blenheim	2013-06-12	2010-12-08	2.51	c	Yes	Goed	No	Geen	Grade 2	3	0	Grade 0	1	0	0	2:C2-C4	0	0	0	0	1	A	Best	L	No
Cavalier King Charles Spaniel	Female	Blenheim	2015-06-10	2014-06-02	1.02	c	Yes	Yes	No	No	Grade 2	2	0	Grade 0	1	0	0	2:C1-C4	0	0	0	0	0	C	Drachten	M	No
Cavalier King Charles Spaniel	Female	Blenheim	2011-10-25	2008-11-04	2.98	b	Yes	Good	no	No info provided	Grade 2	3	0	Grade 1	3	1	0	1:C3	0.7	0	0	3	0	A	Best		No
Cavalier King Charles Spaniel	female (*)	Ruby (*)	2011-01-21	2006-09-26	4.32	b	Unknown		Unknown	Unknown	Grade 2	3	0	Grade 0	0	0	0	0	0	0	3	3	1	A	Best		No
Cavalier King Charles Spaniel	female (*)	Blenheim (*)	2008-06-26	2005-12-24	2.51	c	Unknown		Unknown	Unknown	Grade 2	3	0	Grade 0	0	0	0	0	0	0	0	1	1	A	Best		No
Cavalier King Charles Spaniel	female (*)	Blenheim (*)	2010-12-29	2009-06-14	1.54	c	Unknown		Unknown	Unknown	Grade 2	3	0	Grade 0	0	0	0	0	0	0	0	0	1	C	Best		No
Cavalier King Charles Spaniel	Female	Blenheim	2011-12-21	2009-06-14	2.52	c	Yes	Good	No	No info provided	Grade 2	2	0	Grade 0	1	0	0	0	0	0	0	0	1	A	Best	Stefanie	No
Cavalier King Charles Spaniel	female (*)	Ruby (*)	2011-08-12	2009-12-29	1.62	c	Unknown		Unknown	Unknown	Grade 2	2	0	Grade 0	0	0	0	0	0	0	0	0	1	C	Best		No
Cavalier King Charles Spaniel	female (*)	Blenheim (*)	2010-12-10	2008-04-13	2.66	c	Unknown		Unknown	Unknown	Grade 2	3	0	Grade 2	6	1	0	1:C2-C5	5.1	0	0	1	1	D	Best		No
Cavalier King Charles Spaniel	female (*)	Blenheim (*)	2008-11-04	2008-04-05	0.58	c	Unknown		Unknown	Unknown	Grade 2	2	0	Grade 0	0	0	0	0	0	0	0	0	0	C	Best		No
Cavalier King Charles Spaniel	female (*)	Blenheim (*)	2008-11-04	2008-04-05	0.58	c	Unknown		Unknown	Unknown	Grade 2	3	0	Grade 0	1	0	0	2:C2-C5	0	0	0	0	0	C	Best		No
Cavalier King Charles Spaniel			2009-11-25	2006-09-06	3.22	b	Unknown		Unknown	Unknown	Grade 2	3	0	Grade 2	4	1	0	1:C3-C4	2.3	0	0	0	1	D	Best		No
Cavalier King Charles Spaniel	Male	Ruby	2012-08-09	2011-01-24	1.54	c	yes	Good	No	No info provided	Grade 2	2	0	Grade 0	1	0	0	0	0	0	0	0	0	C	Best	M	No
Cavalier King Charles Spaniel	male (*)	Blenheim (*)	2011-05-10	2008-11-04	2.52	c	Unknown		Unknown	Unknown	Grade 2	3	0	Grade 1	3	0	0	2:C1-C5	0.5	0	0	0	1	A	Best		No
Cavalier King Charles Spaniel			2010-12-15	2008-05-04	2.61	c	Unknown		Unknown	Unknown	Grade 2	3	0	Grade 0	0	0	0	0	0	0	0	1	1	A	Best		No
Cavalier King Charles Spaniel	male (*)	Black and tan (*)	2007-06-30	2002-09-27	4.76	b	Unknown		Unknown	Unknown	Grade 2	3	0	Grade 1	3	1	0	1:C2-C4	1.6	0	2	2	1	A	Meppel		No
Cavalier King Charles Spaniel	Female	Ruby	2012-01-27	2010-10-11	1.29	c	ja	Goed	no	Geen informatie vermeld	Grade 2	3	0	Grade 0	2	0	0	2:C2-C6	0	0	0	0	1.5	C	Best	N	Yes	2
Cavalier King Charles Spaniel	Female	Ruby	2013-04-12	2010-10-11	2.5	c	Yes	Artefact!	no	Geen	Grade 2	3	0	Grade 0	1	0	0	0	0	0	0	0	1	A	Best	P	Yes	2
Cavalier King Charles Spaniel	male (*)	Tricolor (*)	2007-05-04	2003-09-01	3.68	b	Unknown		Unknown	Unknown	Grade 2	3	0	Grade 1	3	0	0	1:C2-C3	1.7	0	0	1	1	A	Best		No
Cavalier King Charles Spaniel	female (*)	Ruby (*)	2011-02-15	2004-12-22	6.15	a	Unknown		Unknown	Unknown	Grade 2	2	0	Grade 1	3	1	0	1:C3	0.5	0	1	0	1	A	Best		No
Cavalier King Charles Spaniel	Female	Black and Tan	2012-11-19	2006-08-25	6.23	a	Yes	Yes	No	Onbekend	Grade 2	3	0	Grade 2	5	1	0	1:C2-C4	3	0	0	2	1	D	Best	P	No
Cavalier King Charles Spaniel	Female	Tricolour	2013-10-25	2012-10-25	1	c	Yes	Good	no	No	Grade 2	2	0	Grade 0	2	1	0	2:C1-C4	1	0	0	0	0	C	Best	M	Yes	2
Cavalier King Charles Spaniel	Female	Tricolour	2015-05-05	2012-10-25	2.53	c	Yes	Yes	No	No	Grade 2	2	0	Grade 0	0	0	0	0	0	0	3	0	0	A	Best	M	Yes	2
Cavalier King Charles Spaniel	male (*)	Blenheim (*)	2011-09-02	2009-02-21	2.53	c	Unknown		Unknown	Unknown	Grade 2	3	0	Grade 2	6	1	0	1:C1-C4	4.3	0	2	2	1	D	Best		No
Cavalier King Charles Spaniel	female (*)		2009-07-09	2002-08-28	6.86	a	Unknown		Unknown	Unknown	Grade 2	3	0	Grade 1	3	0	0	2:C2-C4	1.1	2	1	0	1	A	Best		No
Cavalier King Charles Spaniel	Teef	Black and Tan	2012-01-27	2010-10-11	1.29	c	ja	Goed	No	Geen informatie vermeld	Grade 2	3	0	Grade 0	2	0	0	2:C2-C6	0	0	0	0	0	C	Best	N	Yes	2
Cavalier King Charles Spaniel	Female	Black and Tan	2013-09-19	2010-10-11	2.94	c	Yes	Poor	No	No	Grade 2	3	0	Grade 0	2	1	0	2:C2-C5	0	0	0	0	0	A	Best	M	Yes	2
Cavalier King Charles Spaniel	Male	Ruby	2011-01-21	2009-10-21	1.25	c	Unknown		No	Unknown	Grade 2	3	0	Grade 1	3	1	0	1:C3	1	0	0	0	1	C	Best		Yes	2
Cavalier King Charles Spaniel	Male	Ruby	2012-05-07	2009-10-21	2.54	c	yes	Good	No	No info provided	Grade 2	3	0	Grade 1	3	1	0	1:C2-C3	1.7	0	0	0	1	A	Best	L	Yes	2
Cavalier King Charles Spaniel	female (*)	Blenheim (*)	2009-08-27	2007-09-12	1.96	c	Unknown		Unknown	Unknown	Grade 2	3	0	Grade 0	0	0	0	0	0	0	2	2	1	C	Best		Yes	2
Cavalier King Charles Spaniel	female (*)	Blenheim (*)	2011-01-28	2007-09-12	3.38	b	Unknown		Unknown	Unknown	Grade 2	3	0	Grade 0	1	0	0	2:C2-C6	0	0	3	3	1.5	A	Best		Yes	2
Cavalier King Charles Spaniel	Female	Ruby	2015-06-10	2013-12-25	1.46	c	Yes	Yes	No	No	Grade 2	3	0	Grade 0	1	0	0	2:C2-C5	0	0	0	0	1	C	Best	M	No
Cavalier King Charles Spaniel	Female	Tricolour	2013-06-17	2008-01-03	5.46	a	Yes	Goed	No	Geen	Grade 2	2	0	Grade 2	6	1	0	1:C2-C5	5.86	0	2	3	1	D	Dordrecht	L	No
Cavalier King Charles Spaniel	female (*)	Tricolor (*)	2008-01-26	2005-07-02	2.57	c	Unknown		Unknown	Unknown	Grade 2	3	0	Grade 0	1	0	0	2:C2-C4	0	0	0	0	1	A	Meppel		No
Cavalier King Charles Spaniel	Female	Blenheim	2012-05-24	2009-09-05	2.72	c	yes	Good	No	No info provided	Grade 2	3	0	Grade 2	4	1	0	1:C2-C4	2	0	0	0	1.5	D	Best	M	No
Cavalier King Charles Spaniel	Female	Blenheim	2013-08-27	2010-04-16	3.36	b	Yes	Good	No	No	Grade 2	2	1	Grade 0	2	0	0	0		0	3	3	0	A	Best	M	No
Cavalier King Charles Spaniel			2011-10-12	2011-01-01	0.78	c	Unknown		Unknown	Unknown	Grade 2	3	0	Grade 0	0	0	0	0	0	0	0	0	1	C	Best		No
Cavalier King Charles Spaniel	Male	Black and Tan	2014-01-07	2012-10-22	1.21	c	Yes	Good	No	No	Grade 2	4	0	Grade 1	3	0	0	2:C2-C4	1	2	0	0	1	C	Best	P	Yes	2
Cavalier King Charles Spaniel	Male	Black and Tan	2015-10-27	2012-10-22	3.01	b	Yes	Yes	No	Unknown	Grade 2	3	0	Grade 1	3	1	0	1:C3-C4	1.8	3	0	0	1.5	A	Best	M	Yes	2
Cavalier King Charles Spaniel	Female	Blenheim	2013-04-10	2012-01-11	1.25	c	Yes	Goed	no	Geen	Grade 2	3	0	Grade 0	1	0	0	0	0	0	0	0	0	C	Best	P	Yes	2
Cavalier King Charles Spaniel	Female	Blenheim	2014-09-25	2012-01-11	2.71	c	Yes	Good	No	No	Grade 2	3	0	Grade 0	1	0	0	2:C3-C5	0	0	2	2	1	A	Best	M	Yes	2
Cavalier King Charles Spaniel	reu	Tricolour	2012-01-19	2011-01-03	1.04	c	ja	Matig	No	Auscultatie: geen ruis 0/6	Grade 2	3	0	Grade 2	4	1	0	1:C2-C3	3.2	0	0	0	0	E	Dordrecht		No
Cavalier King Charles Spaniel			2009-03-04	2005-08-02	3.59	b	Unknown		Unknown	Unknown	Grade 2	3	0	Grade 0	0	0	0	0	0	0	0	0	1.5	A	Best		No
Cavalier King Charles Spaniel	Male	Tricolour	2010-09-21	2008-03-15	2.52	c	Unknown		No	Unknown	Grade 2	3	0	Grade 0	1	0	0	2:C1-C5	0	0	2	3	0	A	Best		Yes	2
Cavalier King Charles Spaniel	Male	Tricolour	2015-02-23	2011-07-29	3.57	b	Yes	Yes	No	No	Grade 2	3	0	Grade 2	6	1	0	1:C2-C5	6.8	0	2	2	0	D	Orion	M	Yes	2
Cavalier King Charles Spaniel	Female	Tricolor	2011-04-19	2010-04-16	1.01	c	Unknown		No	Unknown	Grade 2	3	0	Grade 0	1	0	0	0	0		2	0	1.5	C	Best		Yes	2
Cavalier King Charles Spaniel	Female	Tricolor	2012-10-19	2010-04-16	2.51	c	yes	Good	No	No info provided	Grade 2	3	0	Grade 1	3	1	0	1:C3	1.61	0	1	0	1	A	Best	M	Yes	2
Cavalier King Charles Spaniel	Female	Tricolour	2014-04-01	2011-09-29	2.51	c	Yes	Good	No	No	Grade 2	3	0	Grade 1	3	0	0	2:C2-C4	1.7	0	0	1	1	A	Best	M	Yes	2
Cavalier King Charles Spaniel	Female	Tricolour	2013-02-19	2011-09-29	1.39	c	Yes	Yes	No	Onbekend	Grade 2	3	0	Grade 0	2	0	0	2:C2-C4	0	0	0	0	0	C	Best	P	Yes	2
Cavalier King Charles Spaniel	Female	Blenheim	2012-11-22	2011-05-14	1.52	c	Yes	Yes	No	Onbekend	Grade 2	3	0	Grade 0	2	0	0	2:C2-C6	0	0	2	2	1	C	Best	P	Yes	2
Cavalier King Charles Spaniel	Female	Blenheim	2013-12-02	2011-05-14	2.55	c	Yes	Good	No	No	Grade 2	2	0	Grade 0	1	0	0	2:C1-C3	0	0	3	3	0	A	Best	L	Yes	2
Cavalier King Charles Spaniel	Female	Black and Tan	2013-10-21	2011-04-20	2.5	c	Yes	Good	no	No	Grade 2	3	1	Grade 1	3	0	1	2:C1-C4	1.2	0	0	0	0	D	Best	M	No
Cavalier King Charles Spaniel			2007-07-16	2007-01-07	0.53	c	Unknown		Unknown	Unknown	Grade 2	4	0	Grade 0	0	0	0	0	0	0	0	0	1.5	C	Best		No
Cavalier King Charles Spaniel	Male	Blenheim	2013-06-14	2012-06-13	1	c	Yes	Goed	No	Geen	Grade 2	2	1	Grade 0	1	0	0	2:C2-C4	0	0	0	0	0	C	Best	L	Yes	2
Cavalier King Charles Spaniel	Male	Blenheim	2014-12-29	2012-06-13	2.54	c	Yes	Yes	No	No	Grade 2	3	5	Grade 0	1	0	0	2:C3-C4	0	0	0	0	0	A	Best	M	Yes	2
Cavalier King Charles Spaniel	Female	Blenheim	2013-04-03	2011-11-26	1.35	c	Yes	Matig	no	Geen	Grade 2	2	0	Grade 0	1	0	0	0	0	0	0	0	0	C	Best	HAJ	Yes	2
Cavalier King Charles Spaniel	Female	Blenheim	2014-06-02	2011-11-26	2.52	c	Yes	Good	No	No	Grade 2	2	0	Grade 0	1	0	0	2:C3-C4	0	0	0	0	0	A	Best	M	Yes	2
Cavalier King Charles Spaniel	Female	Blenheim	2011-06-08	2010-01-14	1.4	c	Yes	Good	no	No info provided	Grade 2	3	0	Grade 0	1	0	0	0	0	0	0	0	1	C	Best		No
Cavalier King Charles Spaniel	Female	Blenheim	2011-06-08	2010-09-20	0.72	c	Unknown		No	Unknown	Grade 2	3	0	Grade 0	0	0	0	0	0	0	0	0	1	C	Best		Yes	2
Cavalier King Charles Spaniel	Female	Blenheim	2013-04-03	2010-09-20	2.54	c	Yes	Good	no	Geen	Grade 2	3	0	Grade 1	3	1	0	1:C2-C4	1	0	0	0	0	A	Best	HAJ	Yes	2
Cavalier King Charles Spaniel	female (*)	Tricolor (*)	2010-04-21	2008-12-08	1.37	c	Unknown		Unknown	Unknown	Grade 2	3	0	Grade 0	0	0	0	0	0	0	0	0	0	C	Best		No
Cavalier King Charles Spaniel	female (*)	Blenheim (*)	2011-06-08	2008-12-08	2.5	c	Unknown		Unknown	Unknown	Grade 2	3	0	Grade 1	3	0	1	2:C3-C4	0.5	0	0	0	1	A	Best		No
Cavalier King Charles Spaniel	Female	Blenheim	2011-06-08	2010-09-29	0.69	c	Unknown		No	Unknown	Grade 2	3	0	Grade 0	1	0	0	2:C2-C4	0	0	0	0	1	C	Best		Yes	2
Cavalier King Charles Spaniel	Female	Blenheim	2013-04-03	2010-09-29	2.51	c	Yes	Good	no	Geen	Grade 2	3	0	Grade 1	3	1	0	1:C2-C4	1	1	0	3	0	A	Best	HAJ	Yes	2
Cavalier King Charles Spaniel	female (*)	Blenheim (*)	2011-03-16	2009-11-16	1.33	c	Unknown		Unknown	Unknown	Grade 2	4	0	Grade 2	5	1	0	1:C2-C3	3.4	0	0	0	1	E	Best		No
Cavalier King Charles Spaniel	Female	Blenheim	2015-01-05	2012-06-13	2.56	c	Yes	Yes	No	No	Grade 2	3	0	Grade 1	3	1	0	1:C3	1.8	0	0	0	1	A	Best	M	No
Cavalier King Charles Spaniel	female (*)	Blenheim (*)	2007-07-16	2007-01-07	0.53	c	Unknown		Unknown	Unknown	Grade 2	3	0	Grade 1	3	1	0	1:C1-C2	1.3	0	0	0	1	C	Best		No
Cavalier King Charles Spaniel	male (*)	Blenheim (*)	2009-12-03	2004-08-26	5.27	a	Unknown		Unknown	Unknown	Grade 2	3	0	Grade 2	5	1	0	1:C3-C7	3.4	0	0	0	1	D	Best		No
Cavalier King Charles Spaniel	male (*)		2010-02-10	2007-01-07	3.09	b	Unknown		Unknown	Unknown	Grade 2	4	0	Grade 2	5	1	0	1:C2-C5	3.1	0	3	3	1	D	Best		No
Cavalier King Charles Spaniel	female (*)	Blenheim (*)	2011-09-12	2008-09-09	3.01	b	Unknown		Unknown	Unknown	Grade 2	3	0	Grade 0	1	0	0	0	0	0	0	0	1	A	Best		No
Cavalier King Charles Spaniel	female (*)	Tricolor (*)	2011-12-09	2008-09-09	3.25	b	Unknown		Unknown	Unknown	Grade 2	3	0	Grade 2	4	0	0	2:C2-C5	2	0	0	0	1	D	Best		No
Cavalier King Charles Spaniel	female (*)	Tricolor (*)	2011-09-12	2006-09-04	5.02	a	Unknown		Unknown	Unknown	Grade 2	3	0	Grade 0	0	0	0	0	0	0	0	0	1	A	Best		No
Cavalier King Charles Spaniel	Female	Blenheim	2012-07-03	2008-09-09	3.82	b	yes	Good	No	No info provided	Grade 2	2	0	Grade 0	1	0	0	0	0	0	0	0	1	A	Best	L	No
Cavalier King Charles Spaniel	Male	Tricolour	2012-06-08	2009-10-20	2.63	c	yes	Good	No	No info provided	Grade 2	3	0	Grade 0	2	0	0	2:C2-C6	0	0	0	0	0	A	Best	L	No
Cavalier King Charles Spaniel	Female	Blenheim	2012-10-12	2010-11-26	1.88	c	yes	Good	No	No info provided	Grade 2	2	0	Grade 0	1	0	0	0	0	0	0	0	1	C	Best	M	No
Cavalier King Charles Spaniel	Female	Tricolour	2015-02-02	2013-09-18	1.37	c	Yes	Yes	No	No	Grade 2	2	0	Grade 0	1	0	0	2:C2-C5	0	0	0	0	1	C	Best	M	No
Cavalier King Charles Spaniel	Female	Ruby	2013-01-30	2009-12-29	3.09	b	Yes	No!	No	Onbekend	Grade 2	3	0	Grade 0	1	0	0	2:C2-C4	0	0	0	3	0	A	Best	M	No
Cavalier King Charles Spaniel	Male	Tricolour	2015-09-28	2014-09-28	1	c	Yes	Yes	No	Unknown	Grade 2	3	2	Grade 0	2	0	0	2:C1-C6	0	0	0	0	1.5	C	Best	M	No
Cavalier King Charles Spaniel	Female	Blenheim	2014-02-19	2012-08-16	1.51	c	Yes	Good	no	No	Grade 2	3	2	Grade 1	3	1	2	2:C3-C4	1.97	3	2	3	1	C	Best	M	No
Cavalier King Charles Spaniel	Male	Black and Tan	2015-06-26	2014-06-26	1	c	Yes	Yes	No	No	Grade 2	3	0	Grade 0	2	0	0	2:C2-C4	0	0	0	0	0	C	Best	M	No
Cavalier King Charles Spaniel	Male	Black and Tan	2015-08-13	2014-08-13	1	c	Yes	Yes	No	No	Grade 2	3	0	Grade 0	1	0	0	2:C2-C4	0	0	0	0	1	C	Best	M	No
Cavalier King Charles Spaniel			2011-06-29	2008-11-08	2.64	c	Unknown		Unknown	Unknown	Grade 2	3	0	Grade 1	3	1	0	1:C2-C3	1.7	0	0	0	1	A	Best		No
Cavalier King Charles Spaniel	Male	Blenheim	2013-03-07	2004-05-23	8.79	a	Yes	Matig	Unknown	Onbekend	Grade 2	3	0	Grade 2	5	1	0	1:C2-C4	3	0	0	0	0	?	Dordrecht	M	No
Cavalier King Charles Spaniel	Female	Blenheim	2011-12-22	2010-10-10	1.2	c	Yes	Poor quality	No	No info provided	Grade 2	3	0	Grade 0	2	0	0	0	0	0	0	0	0	C	Dordrecht	Stefanie	Yes	2
Cavalier King Charles Spaniel	Female	Blenheim	2014-02-03	2010-10-10	3.31	b	Yes	Good	No	No	Grade 2	2	0	Grade 1	3	0	0	2:C3-C4	1	0	1	1	0	A	Best	P	Yes	2
Cavalier King Charles Spaniel	female (*)	Black and tan (*)	2011-03-21	2008-12-03	2.3	c	Unknown		Unknown	Unknown	Grade 2	3	2	Grade 2	6	1	0	1:C2-C6	7.1	0	2	0	1	E	Best		No
Cavalier King Charles Spaniel	Female		2011-11-24	2009-05-10	2.54	c	Not verified - not displayed on the scan	Yes	Unknown	-	Grade 2	3	0	Grade 0	1	0	0	0	0	0	3	3	0	A	Utrecht	Paul	No
Cavalier King Charles Spaniel			2007-04-16	2004-06-08	2.86	c	Unknown		Unknown	Unknown	Grade 2	3	1	Grade 0	1	0	0	0	0	0	0	2	1	A	Best		No
Cavalier King Charles Spaniel	male (*)	Tricolor (*)	2009-08-24	2008-07-23	1.09	c	Unknown		Unknown	Unknown	Grade 2	3	0	Grade 0	0	0	0	0	0	0	0	0	1.5	C	Best		Yes	2
Cavalier King Charles Spaniel	male (*)	Tricolor (*)	2011-02-01	2008-07-23	2.52	c	Unknown		Unknown	Unknown	Grade 2	3	0	Grade 1	2	0	0	2:C2-C6	0.5	0	0	0	1.5	A	Best		Yes	2
Cavalier King Charles Spaniel	Female	Blenheim	2014-05-08	2013-04-21	1.05	c	Yes	Good	No	No	Grade 2	3	0	Grade 0	1	0	0	2:C3-C4	0	0	0	0	0	C	Best	M	Yes	2
Cavalier King Charles Spaniel	Female	Blenheim	2015-12-23	2013-04-21	2.67	c	Yes	Yes	no	Unknown	Grade 2	3	0	Grade 0	1	0	0	2:C3	0	0	0	0	1.5	A	Best	M	Yes	2
Cavalier King Charles Spaniel	Male	Ruby	2014-05-15	2013-04-27	1.05	c	Yes	Good	No	No	Grade 2	3	0	Grade 0	2	0	0	1:C1-C2	0	0	0	0	1	C	Best	M	No
Cavalier King Charles Spaniel	Female	Ruby	2014-10-15	2013-09-02	1.12	c	Yes	Good	No	No	Grade 2	3	0	Grade 0	2	0	0	2:C2-C4	0	0	0	0	0	C	Best	M	No
Cavalier King Charles Spaniel	Female	Ruby	2015-09-24	2013-09-02	2.06	c	Yes	Yes	No	Unknown	Grade 2	3	0	Grade 0	2	0	0	2:C2-C6	0	0	2	0	0	C	Best	M	No
Cavalier King Charles Spaniel	Female	Black and Tan	2014-10-15	2013-09-02	1.12	c	Yes	Good	No	No	Grade 2	2	0	Grade 0	2	0	0	2:C3-C4	0	0	0	0	0	C	Best	M	No
Cavalier King Charles Spaniel	Male	Blenheim	2014-11-27	2013-09-24	1.18	c	Yes	No	No	No	Grade 2	3	2	Grade 0	1	0	0	0	0	0	0	0	1	C	Best	M	No
Cavalier King Charles Spaniel	Female	Blenheim	2014-11-10	2013-09-24	1.13	c	Yes	Good	No	No	Grade 2	3	0	Grade 0	1	0	0	2:C4-C6	0	0	0	0	1	C	Best	M	No
Cavalier King Charles Spaniel	Female	Ruby	2015-12-23	2014-12-23	1	c	Yes	Yes	no	Unknown	Grade 2	3	0	Grade 0	0	0	1	0	0	0	0	0	0	C	Best	M	No
Cavalier King Charles Spaniel	Male	Blenheim	2014-09-18	2010-02-07	4.61	b	Yes	Good	Present	No	Grade 2	3	5	Grade 2	6	1	3	1:C1-C5	4.6	3	0	0	1	F	Dordrecht	P	No
Cavalier King Charles Spaniel	female (*)	Ruby (*)	2006-05-27	2005-06-07	0.97	c	Unknown		Unknown	Unknown	Grade 2	3	0	Grade 0	0	0	0	0	0	0	0	0	1	C	Meppel		Yes	3
Cavalier King Charles Spaniel	female (*)	Ruby (*)	2008-10-21	2005-06-07	3.37	b	Unknown		Unknown	Unknown	Grade 2	3	0	Grade 0	0	0	0	0	0	0	0	0	1	A	Best		Yes	3
Cavalier King Charles Spaniel	female (*)	Ruby (*)	2011-07-06	2006-05-27	5.11	a	Unknown		Unknown	Unknown	Grade 2	3	0	Grade 1	3	0	0	2:C2-C6	0.5	0	1	3	1	A	Best		Yes	3
Cavalier King Charles Spaniel	male (*)	Black and tan (*)	2007-06-30	2007-01-01	0.5	c	Unknown		Unknown	Unknown	Grade 2	3	0	Grade 0	0	0	0	0	0	0	0	0	1	C	Meppel		No
Cavalier King Charles Spaniel	female (*)	Ruby (*)	2010-06-22	2007-07-26	2.91	c	Unknown		Unknown	Unknown	Grade 2	3	0	Grade 0	1	0	0	0	0	0	0	0	1	A	Best		No
Cavalier King Charles Spaniel	Female	Blenheim	2015-12-28	2012-11-12	3.13	b	Yes	Yes	no	Unknown	Grade 2	3	0	Grade 0	2	0	0	2:C2-C3	0	0	0	0	1.5	A	Best	M	No
Cavalier King Charles Spaniel	male (*)		2009-07-09	2005-11-11	3.66	b	Unknown		Unknown	Unknown	Grade 2	2	0	Grade 1	3	1	0	1:C2-C3	1.4	0	0	2	1	A	Best		No
Cavalier King Charles Spaniel	Female	Blenheim	2012-02-15	2010-05-26	1.72	c	ja	Goed	no	Geen informatie vermeld	Grade 2	2	0	Grade 0	2	0	0	0	0	0	0	1	1.5	C	Best	N	Yes	2
Cavalier King Charles Spaniel	Female	Blenheim	2013-10-16	2010-05-26	3.39	b	Yes	Good	no	No	Grade 2	2	0	Grade 0	1	0	0	2:C2-C4	0	0	3	3	1	A	Best	M	Yes	2
Cavalier King Charles Spaniel	Female	Blenheim	2012-05-15	2011-03-04	1.2	c	yes	Not perfect. C4 is missing	No	No murmur heard	Grade 2	3	0	Grade 0	2	0	0	2:C2-C6	0	0	3	2	0	C	Orion	M	Yes	2
Cavalier King Charles Spaniel	Female	Blenheim	2013-09-18	2011-03-04	2.54	c	Yes	Poor	no	No	Grade 2	2	1	Grade 0	2	1	0	1:C1-C6	0	0	3	0	0	A	Orion	M	Yes	2
Cavalier King Charles Spaniel	Male	Black and Tan	2012-05-31	2010-06-14	1.96	c	yes	Good	No	No info provided	Grade 2	2	0	Grade 0	1	0	0	0	0	0	0	0	1	C	Dordrecht	M	No
Cavalier King Charles Spaniel	Male	Black and Tan	2010-01-22	2007-05-04	2.72	c	Unknown		No	Unknown	Grade 2	2	0	Grade 0	1	0	0	2:C2	0	0	0	0	1	A	Best		Yes	2
Cavalier King Charles Spaniel	Male	Black and Tan	2012-06-14	2007-05-04	5.11	a	yes	Good	No	No abnormalities	Grade 2	3	1	Grade 1	3	0	0	2:C2-C6	1.5	0	0	0	1	A	MCD	L	Yes	2
Cavalier King Charles Spaniel	female (*)	Tricolor (*)	2011-07-26	2009-01-15	2.53	c	Unknown		Unknown	Unknown	Grade 2	3	0	Grade 0	1	0	0	0	0	0	3	0	1	A	Best		No
Cavalier King Charles Spaniel	male (*)	Blenheim (*)	2011-10-07	2010-10-21	0.96	c	Unknown		Unknown	Unknown	Grade 2	3	0	Grade 1	3	0	0	2:C2-C5	0.8	0	0	0	1	C	Best		No
Cavalier King Charles Spaniel	female (*)	Blenheim (*)	2009-06-12	2008-05-19	1.06	c	Unknown		Unknown	Unknown	Grade 2	3	0	Grade 1	3	1	0	1:C2-C4	1.1	0	0	0	1	C	Best		No
Cavalier King Charles Spaniel	Male	Blenheim	2014-09-01	2013-08-14	1.05	c	Yes	Good	No	No	Grade 2	2	0	Grade 0	1	0	0	2:C2-C5	0	0	0	0	0	C	Best	M	No
Cavalier King Charles Spaniel	Female	Blenheim	2012-11-22	2010-10-21	2.09	c	Yes	Yes	No	Onbekend	Grade 2	3	0	Grade 1	3	0	0	2:C2-C5	1	0	2	2	1	C	Best	P	Yes	2
Cavalier King Charles Spaniel	Female	Blenheim	2013-07-24	2010-10-21	2.76	c	Yes	Good	No	No	Grade 2	2	0	Grade 1	3	1	0	1:C3	1.6	0	3	3	1	A	Best	M	Yes	2
Cavalier King Charles Spaniel	Female	Tricolour	2013-02-18	2011-06-17	1.67	c	Yes	Yes	No	Onbekend	Grade 2	2	0	Grade 0	1	0	0	2:C2-C4	0	0	0	0	0	C	Best	P	Yes	2
Cavalier King Charles Spaniel	Female	Tricolour	2014-06-17	2011-06-17	3	b	Yes	Good	No	No	Grade 2	3	2	Grade 1	3	0	0	2:C3	1	0	0	0	0	A	Best	M	Yes	2
Cavalier King Charles Spaniel	Female	Blenheim	2013-02-18	2011-06-17	1.67	c	Yes	Yes	No	Onbekend	Grade 2	3	0	Grade 1	3	1	1	1:C2-C3	1	0	0	0	1	C	Best	P	Yes	2
Cavalier King Charles Spaniel	Female	Blenheim	2014-06-27	2011-06-17	3.03	b	Yes	Good	No	No	Grade 2	3	0	Grade 1	3	0	0	2:C3	1	0	0	0	1	A	Best	M	Yes	2
Cavalier King Charles Spaniel	Male	Ruby	2013-06-20	2012-02-23	1.33	c	Yes	Artefact is visible	No	Geen	Grade 2	3	1	Grade 0	2	0	0	0	0	0	1	2	0	C	Best	M	Yes	2
Cavalier King Charles Spaniel	Male	Ruby	2015-02-24	2012-02-23	3	b	Yes	Yes	No	No	Grade 2	3	0	Grade 0	2	0	0	0	0	0	2	2	0	A	Best	M	Yes	2
Cavalier King Charles Spaniel	Female	Blenheim	2014-06-27	2012-11-12	1.63	c	Yes	Good	No	No	Grade 2	3	0	Grade 0	1	0	0	2:C3	0	0	0	0	1	C	Best	M	No
Cavalier King Charles Spaniel	Female	Tricolour	2014-06-27	2013-04-28	1.16	c	Yes	Good	No	No	Grade 2	2	1	Grade 1	2	0	0	2:C3-C4	1	0	0	0	0	C	Best	M	No
Cavalier King Charles Spaniel	Male	Ruby	2014-09-01	2013-06-28	1.18	c	Yes	Good	No	No	Grade 2	3	0	Grade 1	2	0	0	2:C2-C4	0.7	0	0	0	0	C	Best	M	No
Cavalier King Charles Spaniel	Female	Ruby	2014-09-01	2013-07-10	1.14	c	Yes	Good	No	No	Grade 2	2	0	Grade 0	1	0	0	2:C1-C4	0	0	0	0	0	C	Best	M	No
Cavalier King Charles Spaniel	female (*)	Blenheim (*)	2011-07-06	2006-01-11	5.49	a	Unknown		Unknown	Unknown	Grade 2	3	0	Grade 2	4	1	0	1:C3	2.6	1	2	2	1	D	Best		No
Cavalier King Charles Spaniel	male (*)	Blenheim (*)	2010-08-05	2006-01-11	4.57	b	Unknown		Unknown	Unknown	Grade 2	3	0	Grade 0	1	0	0	0	0	0	0	2	0	A	Best		No
Cavalier King Charles Spaniel	female (*)	Tricolor (*)	2008-10-21	2006-01-11	2.78	c	Unknown		Unknown	Unknown	Grade 2	2	0	Grade 0	0	0	0	0	0	0	0	0	1	A	Best		No
Cavalier King Charles Spaniel	female (*)	Ruby (*)	2010-08-05	2008-01-19	2.54	c	Unknown		Unknown	Unknown	Grade 1	1	0	Grade 2	6	1	0	1:C2-C5	6.2	0	2	0	1	D	Best		No
Cavalier King Charles Spaniel	male (*)	Tricolor (*)	2010-05-10	2008-01-19	2.31	c	Unknown		Unknown	Unknown	Grade 2	3	0	Grade 2	5	1	0	1:C2-C5	3.5	0	0	0	1	D	Best		No
Cavalier King Charles Spaniel	female (*)	Blenheim (*)	2010-08-05	2008-01-24	2.53	c	Unknown		Unknown	Unknown	Grade 2	3	0	Grade 2	5	1	2	1:C3-C4	3.3	0	0	0	1.5	D	Best		No
Cavalier King Charles Spaniel	female (*)	Tricolor (*)	2011-04-29	2008-07-24	2.76	c	Unknown		Unknown	Unknown	Grade 1	1	0	Grade 0	0	0	0	0	0	0	0	0	1	A	Best		No
Cavalier King Charles Spaniel	male (*)	Tricolor (*)	2010-08-05	2008-08-17	1.97	c	Unknown		Unknown	Unknown	Grade 2	3	0	Grade 0	1	0	0	2:C2-C5	0	0	0	0	1	C	Best		Yes	2
Cavalier King Charles Spaniel	male (*)	Tricolor (*)	2011-09-12	2008-08-17	3.07	b	Unknown		Unknown	Unknown	Grade 2	3	0	Grade 1	3	0	0	2:C2-C5	0.5	0	0	3	1	A	Best		Yes	2
Cavalier King Charles Spaniel	female (*)	Blenheim (*)	2009-09-30	2007-03-01	2.58	c	Unknown		Unknown	Unknown	Grade 2	3	0	Grade 2	6	1	0	1:C2-C5	5.4	3	0	0	1.5	D	Best		No
Cavalier King Charles Spaniel	female (*)	Blenheim (*)	2009-09-30	2007-03-01	2.58	c	Unknown		Unknown	Unknown	Grade 2	3	0	Grade 2	6	1	0	1:C2-C6	4.1	3	0	0	1.5	D	Best		No
Cavalier King Charles Spaniel	female (*)	Blenheim (*)	2009-09-03	2007-03-01	2.51	c	Unknown		Unknown	Unknown	Grade 2	2	0	Grade 2	3	1	0	1:C2-C6	1.6	0	1	1	1	A	Best		No
Cavalier King Charles Spaniel	female (*)	Blenheim (*)	2004-09-18	2001-06-15	3.26	b	Unknown		Unknown	Unknown	Grade 2	2	0	Grade 2	5	1	0	1:C2-C6	3.6	0	0	0	1	D	Meppel		No
Cavalier King Charles Spaniel	female (*)	Blenheim (*)	2004-12-04	2001-06-15	3.47	b	Unknown		Unknown	Unknown	Grade 2	3	0	Grade 2	6	1	0	1:C2-T3	7	0	3	0	1	D	Meppel		No
Cavalier King Charles Spaniel	male (*)		2004-09-18	2001-06-15	3.26	b	Unknown		Unknown	Unknown	Grade 2	3	0	Grade 1	3	1	0	1:C2-C3	1.9	0	0	0	1	D	Meppel		No
Cavalier King Charles Spaniel	Teef	Tricolour	2012-01-27	2009-07-11	2.54	c	ja	Redelijk	Unknown	Geen informatie vermeld	Grade 2	2	0	Grade 0	2	0	0	2:C2-C5	0	0	1	0	1.5	A	Best	N	No
Cavalier King Charles Spaniel	male (*)	Ruby (*)	2012-09-04	2009-12-07	2.74	c	ja	Redelijk	Unknown	Geen informatie vermeld	Grade 2	3	0	Grade 0	2	0	0	2:C2-C5	0	0	1	0	1	A	Best		No
Cavalier King Charles Spaniel	female (*)	Ruby (*)	2012-09-04	2009-12-07	2.74	c	ja	Redelijk	Unknown	Geen informatie vermeld	Grade 2	3	0	Grade 0	2	0	0	2:C2-C5	0	0	1	0	1	A	Best		No
Cavalier King Charles Spaniel	female (*)	Blenheim (*)	2004-09-18	2002-02-26	2.56	c	Unknown		Unknown	Unknown	Grade 2	3	1	Grade 1	3	0	0	2:C2-C6	0.5	0	1	1	1	A	Meppel		No
Cavalier King Charles Spaniel	Female	Tricolour	2012-02-14	2010-04-26	1.8	c	ja	Goed	no	Geen informatie vermeld	Grade 2	3	0	Grade 0	2	0	0	2:C2-C6	0	0	0	0	0	C	Best	N	Yes	3
Cavalier King Charles Spaniel	Female	Tricolour	2013-11-06	2010-04-26	3.53	b	Yes	Good	no	No	Grade 2	3	0	Grade 0	0	0	0	2:C2-C4	0	0	0	0	0	A	Best	M	Yes	3
Cavalier King Charles Spaniel	Female	Tricolour	2015-05-13	2010-04-26	5.05	a	Yes	Yes	No	No	Grade 2	3	0	Grade 0	1	0	0	0	0	0	0	0	1.5	A	Best	M	Yes	3
Cavalier King Charles Spaniel	female (*)	Blenheim (*)	2004-09-18	2002-06-09	2.28	c	Unknown		Unknown	Unknown	Grade 2	3	1	Grade 2	4	1	0	1:C2-C5	3	0	0	0	1	E	Meppel		No
Cavalier King Charles Spaniel	male (*)	Tricolor (*)	2004-09-18	2002-07-10	2.19	c	Unknown		Unknown	Unknown	Grade 2	3	0	Grade 0	0	0	0	2:C2-C6	0	0	0	0	0	C	Meppel		Yes	2
Cavalier King Charles Spaniel	male (*)	Tricolor (*)	2008-10-21	2002-07-10	6.28	a	Unknown		Unknown	Unknown	Grade 2	3	0	Grade 0	1	0	0	2:C2-C6	0	0	0	3	1	A	Best		Yes	2
Cavalier King Charles Spaniel	Female	Tricolor	2011-10-13	2008-10-09	3.01	b	Yes	Good	no	No info provided	Grade 2	3	0	Grade 0	1	0	0	0	0	0	0	0	1	A	Best		No
Cavalier King Charles Spaniel	male (*)		2011-06-28	2008-12-02	2.57	c	Unknown		Unknown	Unknown	Grade 2	3	0	Grade 0	0	0	0	0	0	0	0	0	1	A	Best		No
Cavalier King Charles Spaniel	Male	Ruby	2013-04-23	2012-04-18	1.01	c			Unknown		Grade 2	3	0	Grade 1	3	0	0	2:C2-C4	1	0	3	3	0	C	Best		No
Cavalier King Charles Spaniel	Female	Tricolour	2008-09-25	2008-02-11	0.62	c	Unknown		no	Unknown	Grade 2	3	0	Grade 0	0	0	0	0	0	0	0	0	1	C	Best		Yes	3
Cavalier King Charles Spaniel	Female	Tricolour	2010-08-20	2008-02-11	2.53	c	Unknown		No	Unknown	Grade 2	3	0	Grade 0	1	0	0	0	0	0	0	0	1	A	Best		Yes	3
Cavalier King Charles Spaniel	Female	Tricolour	2013-05-29	2008-02-11	5.3	a	Yes	Goed	No	Geen	Grade 2	2	0	Grade 0	1	0	0	0	0	0	0	0	0	A	Best	P	Yes	3
Cavalier King Charles Spaniel	Female	Tricolour	2015-05-06	2014-04-22	1.04	c	Yes	Yes	No	No	Grade 2	3	1	Grade 1	2	0	0	0	1	0	0	1	0	C	Best	M	No
Cavalier King Charles Spaniel	female (*)	Blenheim (*)	2011-06-10	2009-06-06	2.01	c	Unknown		Unknown	Unknown	Grade 2	3	0	Grade 2	4	1	0	1:C3-C4	2.4	0	0	0	1	E	Best		No
Cavalier King Charles Spaniel	Female	Ruby	2012-11-22	2009-09-17	3.18	b	Yes	Yes	No	Onbekend	Grade 2	2	0	Grade 0	1	0	0	0	0	0	0	0	1	A	Best	P	No
Cavalier King Charles Spaniel	Female	Tricolour	2012-06-12	2010-10-04	1.69	c	yes	Poor	No	No info provided	Grade 2	3	0	Grade 1	3	0	0	0	0.8	0	0	0	1.5	C	Best	P	Yes	2
Cavalier King Charles Spaniel	Female	Tricolour	2013-09-27	2010-10-04	2.98	c	Yes	Good	no	No	Grade 2	3	0	Grade 2	4	1	0	2:C2-C3	2.3	0	0	0	0	D	Best	M	Yes	2
Cavalier King Charles Spaniel	female (*)	Blenheim (*)	2011-08-31	2008-01-02	3.66	b	Unknown		Unknown	Unknown	Grade 2	3	0	Grade 0	0	0	0	0	0	0	0	0	1	A	Best		No
Cavalier King Charles Spaniel	Male	Tricolour	2012-03-08	2010-08-21	1.55	c	ja	Goed	No	No info provided	Grade 2	3	0	Grade 0	2	0	0	2:C2-C6	0	0	0	0	0	C	Utrecht	N	No
Cavalier King Charles Spaniel	Female	Tri colour	2013-04-03	2010-08-21	2.62	c	Yes	Good	no	Geen	Grade 2	2	0	Grade 2	3	1	1	1:C2-C3	0.5	0	0	0	0	D	Utrecht	M	No
Cavalier King Charles Spaniel	Female	Blenheim	2013-04-03	2010-08-21	2.62	c	Yes	Good	no	Geen	Grade 2	2	0	Grade 0	1	0	0	0	0	0	0	0	1	A	Utrecht	M	No
Cavalier King Charles Spaniel	Female	Blenheim	2013-02-19	2007-09-23	5.41	a	Yes	Yes	No	Onbekend	Grade 2	3	0	Grade 1	3	1	0	1:C2	0.5	0	2	3	1	A	Best	P	No
Cavalier King Charles Spaniel	Female	Black and Tan	2011-12-02	2005-07-14	6.38	a	Yes	Good	no	No info provided	Grade 2	2	0	Grade 1	3	1	0	1:C2-C3	1.1	0	0	2	1	A	Best	Stefanie	No
Cavalier King Charles Spaniel	female (*)	Black and tan (*)	2011-07-08	2010-02-11	1.41	c	Unknown		Unknown	Unknown	Grade 2	3	0	Grade 0	1	0	0	0	0	0	0	0	1	C	Best		No
Cavalier King Charles Spaniel			2011-06-29	2010-02-11	1.38	c	Unknown		Unknown	Unknown	Grade 2	3	0	Grade 0	1	0	0	0	0	0	0	0	1	C	Best		No
Cavalier King Charles Spaniel	Female	Ruby	2015-07-14	2010-09-06	4.86	b	Yes	Yes	No	No	Grade 2	3	0	Grade 0	0	0	0	0	0	0	0	0	0	A	Best	M	No
Cavalier King Charles Spaniel	female (*)	Blenheim (*)	2010-08-27	2006-06-01	4.24	b	Unknown		Unknown	Unknown	Grade 2	3	0	Grade 0	0	0	0	0	0	0	0	0	1	A	Best		No
Cavalier King Charles Spaniel	Female	Tricolour	2013-04-08	2010-01-07	3.25	b	Yes	Goed	no	Geen	Grade 2	3	0	Grade 0	1	0	0	0	0	0	0	0	1	A	Best	P	No
Cavalier King Charles Spaniel	Male	Tricolor	2011-04-28	2010-04-08	1.06	c	Unknown		No	Unknown	Grade 2	3	0	Grade 0	1	0	0	0	0	0	2	0	1	C	Best		Yes	2
Cavalier King Charles Spaniel	Male	Tricolor	2012-10-17	2010-04-08	2.53	c	yes	Good	No	No info provided	Grade 2	3	0	Grade 0	2	0	0	2:C2-C6	0	0	1	0	1	A	Best	M	Yes	2
Cavalier King Charles Spaniel	Female	Blenheim	2011-12-21	2008-04-17	3.68	b	Yes	Good	No	No info provided	Grade 2	3	0	Grade 1	3	0	0	2:C2-C5	1	0	0	0	1	A	Best	Stefanie	No
Cavalier King Charles Spaniel	Female	Blenheim	2014-11-04	2013-06-22	1.37	c	Yes	Good	No	No	Grade 2	2	0	Grade 0	1	0	0	2:C3-C4	0	0	0	0	0	C	Best	M	No
Cavalier King Charles Spaniel			2007-06-29	2005-04-19	2.19	c	Unknown		Unknown	Unknown	Grade 2	3	0	Grade 0	0	0	0	0	0	0	0	0	0	C	Best		No
Cavalier King Charles Spaniel	Female	Blenheim	2015-08-26	2013-01-14	2.62	c	Yes	Yes	no	Unknown	Grade 2	3	0	Grade 0	0	0	0	0	0	0	0	0	1,5 (at the level of C5 a very large artefact)	A	Best	M	No
Cavalier King Charles Spaniel	female (*)	Blenheim (*)	2009-11-25	2008-11-04	1.06	c	Unknown		Unknown	Unknown	Grade 2	3	0	Grade 0	0	0	0	0	0	0	0	0	1	C	Best		No
Cavalier King Charles Spaniel	Female	Ruby	2011-05-13	2010-05-13	1	c	Unknown		No	Unknown	Grade 2	3	0	Grade 0	0		0	0	0	0	0	2	1	C	Best		Yes	2
Cavalier King Charles Spaniel	Female	Ruby	2012-11-16	2010-05-13	2.51	c	yes	Yes	No	No info provided	Grade 2	2	0	Grade 0	1	0	0	0	0	0	0	0	0	A	Best	M	Yes	2
Cavalier King Charles Spaniel	Male	Blenheim	2013-04-04	2012-04-04	1	c	Yes	Good	no	Geen	Grade 2	2	0	Grade 0	2	0	0	2:C2-C5	0	0	1	2	0	C	Best	HAJ	No
Cavalier King Charles Spaniel	Female	Tricolor	2010-08-09	2008-11-17	1.73	c	Unknown		No	Unknown	Grade 2	3	0	Grade 0	0	0	0	0	0	0	0	0	1	C	Best		Yes	2
Cavalier King Charles Spaniel	Female	Tricolor	2011-11-11	2008-11-17	2.98	b	Yes	Good	no	No info provided	Grade 2	3	0	Grade 0	1	0	0	0	0	0	0	0	1	A	Best		Yes	2
Cavalier King Charles Spaniel	Female	Blenheim	2013-04-04	2012-04-04	1	c	Yes	Good	no	Geen	Grade 2	3	0	Grade 0	1	0	0	0	0	0	0	0	0	C	Best	HAJ	Yes	2
Cavalier King Charles Spaniel	Female	Blenheim	2014-10-04	2012-04-04	2.5	c	Yes	Good	No	No	Grade 2	3	0	Grade 0	1	0	0	2:C2-C4	0	0	0	0	1	A	Best	M	Yes	2
Cavalier King Charles Spaniel	Male	Blenheim	2012-03-19	2011-01-30	1.14	c	yes	Good	No	No info provided	Grade 2	2	0	Grade 0	1	0	0	0	0	0	0	0	0	C	Best	N	No
Cavalier King Charles Spaniel	Female	Blenheim	2013-12-12	2011-03-23	2.72	c	Yes	Good	No	No	Grade 2	3	0	Grade 0	2	0	0	0	0	0	0	0	0	A	Best	P	No
Cavalier King Charles Spaniel	Female	Blenheim	2012-02-02	2010-08-01	1.5	c	ja	Goed	No	Geen info vermeld	Grade 2	3	0	Grade 1	3	0	0	2:C2-C5	0.5	0	0	0	0	C	Best	L	Yes	2
Cavalier King Charles Spaniel	Female	Blenheim	2013-08-08	2010-08-01	3.02	b	Yes		No	Geen	Grade 2	2	1	Grade 1	3	1	0	1:C2-C3	1.7	0	0	0	0	A	MCD	M	Yes	2
Cavalier King Charles Spaniel	Male	Blenheim	2015-09-15	2014-05-16	1.33	c	Yes	Yes	No	Unknown	Grade 2	3	2	Grade 0	2	0	0	2:C3-C5	0	0	1	3	0	C	Best	M	No
Cavalier King Charles Spaniel	female (*)	Ruby (*)	2011-08-23	2005-11-09	5.79	a	Unknown		Unknown	Unknown	Grade 2	3	0	Grade 0	0	0	0	0	0	0	0	0	1	A	Best		No
Cavalier King Charles Spaniel	female (*)	Black and tan (*)	2010-12-06	2008-03-03	2.76	c	Unknown		Unknown	Unknown	Grade 2	3	0	Grade 1	3	1	0	1:C2-C3	1.6	0	0	0	1	A	Best		No
Cavalier King Charles Spaniel	Female	Tricolour	2014-10-13	2012-03-31	2.54	c	Yes	Good	No	No	Grade 2	2	0	Grade 2	5	1	0	1:C1-C4	3.5	0	0	0	0	D	Best	M	No
Cavalier King Charles Spaniel	female (*)	Tricolor (*)	2011-03-25	2007-09-26	3.5	b	Unknown		Unknown	Unknown	Grade 2	3	0	Grade 1	3	1	0	1:C3	1	0	0	1	1	A	Best		No
Cavalier King Charles Spaniel	Male	Tricolour	2015-08-03	2013-01-31	2.51	c	Yes	Yes	No	No	Grade 2	2	0	Grade 0	2	0	1	2:C2-C3	0	1	0	0	1.5	A	Best	M	No
Cavalier King Charles Spaniel	Male	Blenheim	2014-07-10	2013-06-12	1.08	c	Yes	Good	No	No	Grade 2	2	0	Grade 1	2	0	0	2:C2-C3	0.8	0	0	0	0	C	Best	M	No
Cavalier King Charles Spaniel	Female	Ruby	2012-11-26	2010-03-22	2.68	c	Yes	Yes	No	Onbekend	Grade 2	2	0	Grade 0	1	0	0	0	0	0	0	0	1	A	Best	P	No
Cavalier King Charles Spaniel	Female	Blenheim	2013-04-23	2011-09-12	1.61	c			No		Grade 2	3	0	Grade 0	1	0	0	2:C2-C5	0	1	0	0	1	C	Best		Yes	2
Cavalier King Charles Spaniel	Female	Blenheim	2014-07-10	2011-09-12	2.83	c	Yes	Good	No	No	Grade 2	3	2	Grade 1	2	0	0	0	0.8	0	0	0	1	A	Best	M	Yes	2
Cavalier King Charles Spaniel	Male	Black and Tan	2012-08-07	2007-11-12	4.74	b	yes	Good	No	No info provided	Grade 2	3	0	Grade 1	3	1	0	1:C3	1.8	0	0	0	1	A	Best	M	No
Cavalier King Charles Spaniel	Female	Blenheim	2012-12-13	2011-09-12	1.25	c	Yes	Yes	No	Onbekend	Grade 2	2	0	Grade 0	1	0	0	0	0	0	0	0	1	C	Best	S	No
Cavalier King Charles Spaniel	Female	Black and Tan	2014-09-18	2011-10-29	2.89	c	Yes	Good	No	No	Grade 2	3	1	Grade 1	3	1	1	1:C3	1.5	0	0	0	1	A	Best	P	No
Cavalier King Charles Spaniel	female (*)	Tricolor (*)	2012-08-07	2008-05-09	4.24	b			Unknown		Grade 2	3	0	Grade 2	6	1	0	1:C3	4.5	0	0	0	1	D	Best		No
Cavalier King Charles Spaniel	Female	Ruby	2013-02-07	2011-03-22	1.88	c	Yes	Yes	No	Onbekend	Grade 2	3	0	Grade 0	1	0	0	2:C2-C4	0	3	0	0	1	C	Dordrecht	V	Yes	2
Cavalier King Charles Spaniel	Female	Ruby	2014-01-20	2011-03-22	2.83	c	Yes	Good	No	No	Grade 2	4	0	Grade 1	3	0	0	2:C2-C4	1.3	2	0	0	0	A	Best	P	Yes	2
Cavalier King Charles Spaniel	Female	Black and Tan	2013-02-07	2011-03-22	1.88	c	Yes	No!	No	Onbekend	Grade 2	3	0	Grade 0	1	0	0	2:C2-C4	0	0	0	0	0	C	Dordrecht	V	Yes	2
Cavalier King Charles Spaniel	Female	Black and Tan	2014-01-20	2011-03-22	2.83	c	Yes	Good	No	No	Grade 2	2	0	Grade 0	0	0	0	0	0	0	0	0	1	A	Best	P	Yes	2
Cavalier King Charles Spaniel	Male	Blenheim	2015-05-21	2014-04-23	1.08	c	Yes	Yes	No	No	Grade 2	2	5	Grade 0	0	0	0	0	0	0	0	0	0	C	Best	M	No
Cavalier King Charles Spaniel	female (*)	Tricolor (*)	2008-10-06	2006-09-19	2.05	c	Unknown		Unknown	Unknown	Grade 2	3	0	Grade 0	0	0	0	0	0	0	2	2	1	C	Best		Yes	2
Cavalier King Charles Spaniel	female (*)	Tricolor (*)	2009-07-16	2006-09-19	2.83	c	Unknown		Unknown	Unknown	Grade 2	3	0	Grade 0	0	0	0	0	0	0	2	2	1	A	Best		Yes	2
Cavalier King Charles Spaniel	Male	Black and Tan	2014-03-03	2011-03-22	2.95	c	Yes	Good	No	No	Grade 2	2	1	Grade 0	1	0	0	2:C1-C5	0	0	0	2	1	A	Best	M	No
Cavalier King Charles Spaniel	Female	Tricolour	2013-04-10	2012-04-03	1.02	c	Yes	Goed	no	Geen	Grade 2	3	0	Grade 0	1	0	0	0	0	0	0	0	0	C	Best	P	Yes	2
Cavalier King Charles Spaniel	Female	Tricolour	2014-10-04	2012-04-03	2.5	c	Yes	Good	No	No	Grade 2	3	1	Grade 0	1	0	0	2:C2-C4	0	0	1	2	1	A	Best	M	Yes	2
Cavalier King Charles Spaniel	Female	Ruby	2015-12-15	2014-07-01	1.46	c	Yes	Yes	no	Unknown	Grade 2	3	0	Grade 0	1	0	0	2:C3-C5	0	0	0	0	0	C	Best	M	No
Cavalier King Charles Spaniel	female (*)	Tricolor (*)	2011-11-02	2008-07-14	3.3	b			Unknown		Grade 2	3	0	Grade 1	3	1	0	1:C3	1.7	0	0	0	1	A	Best		No
Cavalier King Charles Spaniel			2008-01-10	2003-08-30	4.36	b	Unknown		Unknown	Unknown	Grade 2	3	0	Grade 0	0	0	0	2:C2-C4	0	0	3	0	1	A	Best		No
Cavalier King Charles Spaniel	Female	Ruby	2011-05-26	2008-09-17	2.69	c	Yes	Good	No	No info provided	Grade 2	3	0	Grade 2	5	1	0	1:C3	3	0	0	0	1	D	Best	P	No
Cavalier King Charles Spaniel	Female	Ruby	2014-09-18	2012-02-16	2.59	c	Yes	Good	No	No	Grade 2	3	2	Grade 1	3	1	0	1:C3-C4	1.5	0	0	0	0	A	Best	P	No
Cavalier King Charles Spaniel	Female	Blenheim	2011-12-21	2010-09-20	1.25	c	Yes	Good	No	No info provided	Grade 2	3	0	Grade 0	1	0	0	0	0	0	0	0	1	C	Best	Stefanie	Yes	2
Cavalier King Charles Spaniel	Female	Blenheim	2014-02-26	2010-09-20	3.43	b	Yes	Good	No	No	Grade 2	2	1	Grade 0	1	0	0	2:C2-C3	0	0	0	2	0	A	Best	M	Yes	2
Cavalier King Charles Spaniel	Male	Tricolour	2015-10-20	2014-10-16	1.01	c	Yes	Yes	No	Unknown	Grade 2	3	0	Grade 0	1	0	0	2:C2	0	0	0	0	1.5	C	Best	M	No
Cavalier King Charles Spaniel	Male	Blenheim	2014-05-08	2011-09-26	2.62	c	Yes	Good	No	No	Grade 2	3	0	Grade 0	1	0	0	2:C3-C5	0	0	0	0	1	A	Best	M	No
